# Supplementary material for: A simple monoselective C–H oxygenation approach for the synthesis of ursane triterpenoids
Source: Royal Society of Chemistry journal article supplement (doi:10.1039/d3ob00016h), 2023-01-01
Supplement: d3ob00016h1.pdf [file d3ob00016h1.pdf]

## Supplemental Information

### A Simple Monoselective C-H Oxygenation Approach for the Synthesis of Ursane Triterpenoids

Wenyi Mei <sup>a</sup>, Sisi Fan <sup>a</sup>, Yufei Han <sup>a</sup>, Cunjian Shi <sup>a</sup>, Lijie Qiu <sup>a</sup>, Yunheng Shen <sup>b</sup>,  
Zhenjiang Zhao <sup>a\*</sup>, Yufang Xu <sup>a\*</sup>, Honglin Li <sup>a\*</sup>

<sup>a</sup> Shanghai Key Laboratory of New Drug Design, State Key Laboratory of Bioreactor Engineering, School of Pharmacy, East China University of Science and Technology, 130 Meilong Road, Shanghai 200237, China

<sup>b</sup> Department of Phytochemistry, School of Pharmacy, Naval Medical University, 325 Guohe Road, Shanghai 200433, China

#### Corresponding author

Yufang Xu, Email: [yfxu@ecust.edu.cn](mailto:yfxu@ecust.edu.cn). Phone: +86-21-64251399.

Honglin Li, Email: [hlli@ecust.edu.cn](mailto:hlli@ecust.edu.cn). Phone: +86-21-64250213.

Zhenjiang Zhao, E-mail: [zhjzhao@ecust.edu.cn](mailto:zhjzhao@ecust.edu.cn).

#### Contents

|                               |    |
|-------------------------------|----|
| General Information .....     | 2  |
| Experimental procedures ..... | 2  |
| NMR Spectras.....             | 23 |
| References.....               | 51 |

## General Information

All the reactions were carried out under nitrogen or argon atmosphere with anhydrous solvents in flame-dried glassware, unless otherwise noted. All reagents and solvents were used as received from commercial suppliers unless otherwise stated. Reaction progress was monitored by thin layer chromatography (TLC) performed on aluminum plates coated with Kiese gel F254 with 0.2 mm thickness. Visualization was carried out Phosphomolybdic Acid (PMA) and heat as developing agents. Flash column chromatography was performed on silica gel Sili Flash P60 (40-63  $\mu\text{m}$ ).  $^1\text{H}$  and  $^{13}\text{C}$  NMR spectra were recorded using Bruker spectrometers at 300 K with chemical shifts reported as parts per million (ppm) and  $\text{Me}_4\text{Si}$  as the internal standard, residual  $\text{CHCl}_3$  ( $^1\text{H}$  NMR  $\delta = 7.26$  ppm,  $^{13}\text{C}$  NMR  $\delta = 77.16$  ppm),  $\text{CH}_3\text{OH}$  ( $^1\text{H}$  NMR  $\delta = 3.30$  ppm,  $^{13}\text{C}$  NMR  $\delta = 49.00$  ppm) or  $\text{C}_5\text{H}_5\text{N}$  ( $^1\text{H}$  NMR  $\delta = 7.20, 7.57, 8.72$  ppm,  $^{13}\text{C}$  NMR  $\delta = 123.44, 135.43, 149.84$  ppm).  $^1\text{H}$  NMR splitting patterns were designated as broad (b), singlet (s), doublet (d), triplet (t), quartet (q) or combinations thereof, splitting patterns that could not be interpreted were designated as multiplet (m). ESI-MS was run on an Ion Spec Ultra instrument using HP-5989A.

## Experimental procedures

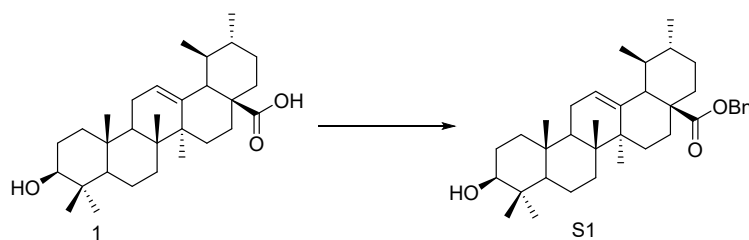

To a solution of ursolic acid (20.00 g, 43.86 mmol) and DMF (100 mL) was added  $\text{K}_2\text{CO}_3$  (12.00 g, 86.82 mmol) and BnBr (11.00 g, 64.33 mmol). The reaction mixture was warmed to 55  $^\circ\text{C}$  and stirred for 8 h. After cooling to room temperature and poured into ice water to give a white precipitate, filtered and dried to give the benzyl ester **S1** (22.00 g, 92%).  $^1\text{H}$  NMR (400 MHz,  $\text{CDCl}_3$ )  $\delta$  7.40 – 7.29 (m, 5H), 5.23 (t,  $J = 3.5$  Hz, 1H), 5.10 (d,  $J = 12.5$  Hz, 1H), 4.98 (d,  $J = 12.5$  Hz, 1H), 3.21 (dd,  $J = 10.8, 4.8$  Hz, 1H), 2.27 (d,  $J = 11.3$  Hz, 1H), 2.06 – 1.96 (m, 1H), 1.90 – 1.82 (m, 2H), 1.82 – 1.76 (m, 1H), 1.76 – 1.64 (m, 3H), 1.63 – 1.57 (m, 3H), 1.52 – 1.42 (m, 4H), 1.40 – 1.25 (m, 6H), 1.07 (s, 3H), 1.03 (dd,  $J = 13.4, 2.6$  Hz, 1H), 0.98 (s, 3H), 0.93 (d,  $J = 6.0$  Hz, 3H), 0.90 (s, 3H), 0.85 (d,  $J = 6.4$  Hz, 3H), 0.78 (s, 3H), 0.71 (d,  $J = 12.3$  Hz, 1H), 0.64 (s, 3H).  $^{13}\text{C}$  NMR (151 MHz,  $\text{CDCl}_3$ )  $\delta$  177.4, 167.1, 138.3, 136.5, 128.5, 128.3, 128.1, 125.7, 66.1, 55.9, 53.1, 48.3, 47.2, 42.3, 40.4, 39.7, 39.2, 39.0, 38.7, 37.1, 36.8, 32.9, 30.8, 28.1, 27.5, 24.4, 23.6, 23.5, 23.5, 21.3, 19.2, 17.3, 17.2, 17.2, 15.2. HRMS (ESI-MS,  $m/z$ )  $[\text{M} + \text{Na}]^+$  calc. for  $\text{C}_{37}\text{H}_{54}\text{O}_3\text{Na}$ : 569.3971, found: 569.3972.

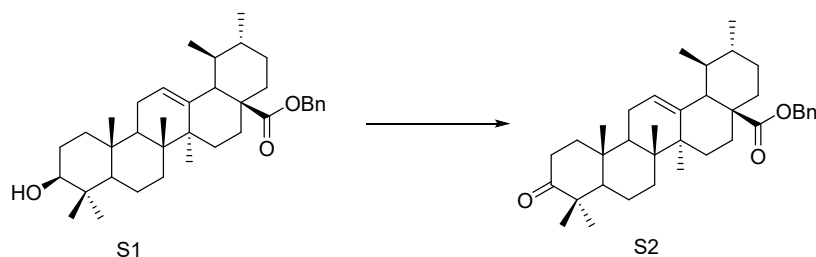

To a solution of benzyl ester **S1** (2.60 g, 4.80 mmol), NaHCO<sub>3</sub> (0.61 g, 7.26 mmol) and DCM (50 mL) was added Dess-Martin periodinane (3.10 g, 7.49 mmol) in batches at 0 °C. The reaction mixture was warmed to room temperature and stirred for 2 h. The reaction mixture was quenched with saturated Na<sub>2</sub>S<sub>2</sub>O<sub>3</sub> and diluted with DCM (300 mL), the organic layer was washed with H<sub>2</sub>O and brine, dried over Na<sub>2</sub>SO<sub>4</sub>, filtered, and concentrated to afford a yellow oil, recrystallization by methanol to give 3-ketone derivative **S2** (2.50 g, 96%) as a white solid. <sup>1</sup>H NMR (400 MHz, CDCl<sub>3</sub>) δ 7.38 – 7.28 (m, 5H), 5.25 (t, *J* = 3.5 Hz, 1H), 5.11 (d, *J* = 12.5 Hz, 1H), 4.99 (d, *J* = 12.5 Hz, 1H), 2.53 (dd, *J* = 10.9, 7.3 Hz, 1H), 2.37 (dd, *J* = 6.9, 3.7 Hz, 1H), 2.28 (d, *J* = 11.3 Hz, 1H), 2.05 – 1.96 (m, 1H), 1.92 (d, *J* = 3.4 Hz, 1H), 1.92 – 1.85 (m, 2H), 1.80 (dt, *J* = 12.0, 6.0 Hz, 1H), 1.76 – 1.67 (m, 2H), 1.66 – 1.57 (m, 2H), 1.53 (dd, *J* = 19.0, 6.3 Hz, 2H), 1.46 (dd, *J* = 6.2, 2.7 Hz, 2H), 1.45 – 1.39 (m, 2H), 1.36 (dd, *J* = 14.0, 4.5 Hz, 2H), 1.32 – 1.28 (m, 2H), 1.28 – 1.22 (m, 1H), 1.08 (s, 6H), 1.03 (d, *J* = 7.1 Hz, 6H), 0.93 (d, *J* = 6.1 Hz, 3H), 0.85 (d, *J* = 6.4 Hz, 3H), 0.68 (s, 3H). <sup>13</sup>C NMR (151 MHz, CDCl<sub>3</sub>) δ 217.9, 177.4, 138.4, 136.5, 128.5, 128.3, 128.1, 125.6, 66.1, 55.4, 53.1, 48.3, 47.5, 46.9, 42.3, 39.6, 39.5, 39.3, 39.0, 36.8, 36.7, 34.3, 32.7, 30.8, 28.1, 26.7, 24.4, 23.6, 23.6, 21.3, 19.7, 17.1, 17.1, 15.4. HRMS (ESI-MS, *m/z*) [M + Na]<sup>+</sup> calc. for C<sub>37</sub>H<sub>52</sub>O<sub>3</sub>Na: 567.3814, found: 567.3813.

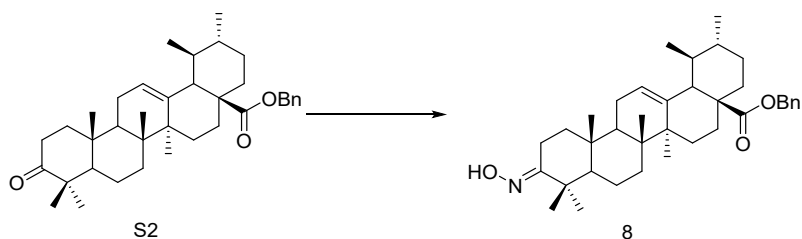

To a solution of the 3-ketone **S2** (1.00 g, 1.77 mmol) in pyridine (15 mL), H<sub>2</sub>NOH•HCl (0.19 g, 2.73 mmol) was added. The solution was stirred at 50 °C for 30 min. Pyridine were removed by evaporation in vacuo, the residue was acidified with 1 mol/L HCl (20 mL) and extracted with DCM, the organic layer was washed with H<sub>2</sub>O and brine, dried over Na<sub>2</sub>SO<sub>4</sub>, filtered, and concentrated in vacuo to afford **8** (0.98 g, 95%) as a white solid without further purification. <sup>1</sup>H NMR (400 MHz, DMSO-*d*<sub>6</sub>) δ 10.29 (s, 1H), 7.41 – 7.27 (m, 5H), 5.15 (t, *J* = 3.5 Hz, 1H), 5.05 (d, *J* = 12.5 Hz, 1H),

4.96 (d,  $J = 12.5$  Hz, 1H), 2.89 (ddd,  $J = 15.6, 5.4, 3.2$  Hz, 1H), 2.18 (d,  $J = 11.3$  Hz, 1H), 2.14 – 1.95 (m, 2H), 1.92 – 1.77 (m, 2H), 1.76 – 1.70 (m, 1H), 1.70 – 1.55 (m, 4H), 1.55 – 1.39 (m, 5H), 1.39 – 1.20 (m, 5H), 1.08 (s, 3H), 1.03 (s, 3H), 0.97 (s, 4H), 0.93 (s, 4H), 0.90 (d,  $J = 4.8$  Hz, 3H), 0.86 – 0.83 (m, 2H), 0.81 (d,  $J = 6.4$  Hz, 3H), 0.58 (s, 3H).  $^{13}\text{C}$  NMR (151 MHz,  $\text{CDCl}_3$ )  $\delta$  177.4, 167.6, 138.3, 136.5, 128.6, 128.3, 128.1, 125.7, 66.1, 60.6, 55.9, 53.1, 48.3, 47.2, 42.3, 40.4, 39.7, 39.2, 39.0, 38.7, 37.1, 36.8, 32.9, 30.8, 29.8, 28.1, 27.5, 24.4, 23.6, 23.5, 23.5, 21.3, 19.2, 17.3, 17.2, 17.2, 15.2, 14.3. HRMS (ESI-MS,  $m/z$ )  $[\text{M} + \text{H}]^+$  calc. for  $\text{C}_{37}\text{H}_{54}\text{NO}_3$ : 560.4104, found: 560.4107.

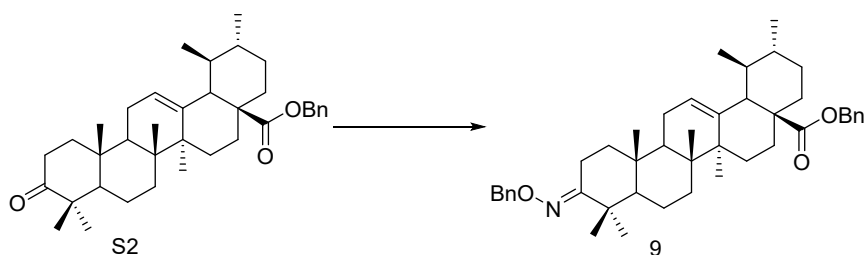

Following the procedure for preparation of 8 afforded 9 (2.0 g, 90%) as a white solid.  $^1\text{H}$  NMR (400 MHz,  $\text{CDCl}_3$ )  $\delta$  7.40 – 7.27 (m, 10H), 5.24 (t,  $J = 3.7$  Hz, 1H), 5.11 (d,  $J = 12.5$  Hz, 1H), 5.06 (s, 2H), 4.98 (d,  $J = 12.4$  Hz, 1H), 2.98 (ddd,  $J = 15.7, 5.6, 3.5$  Hz, 1H), 2.27 (d,  $J = 11.3$  Hz, 1H), 2.19 (ddd,  $J = 15.6, 12.2, 6.0$  Hz, 1H), 2.00 (dt,  $J = 13.2, 7.0$  Hz, 1H), 1.90 – 1.84 (m, 2H), 1.81 (dd,  $J = 13.6, 4.7$  Hz, 1H), 1.76 – 1.63 (m, 4H), 1.63 – 1.56 (m, 2H), 1.55 – 1.43 (m, 4H), 1.42 – 1.22 (m, 6H), 1.15 (s, 3H), 1.12 – 1.07 (m, 1H), 1.06 (s, 3H), 1.04 (s, 3H), 1.00 (s, 2H), 0.96 (s, 3H), 0.94 (d,  $J = 6.1$  Hz, 3H), 0.85 (d,  $J = 6.4$  Hz, 3H), 0.67 (s, 3H).  $^{13}\text{C}$  NMR (151 MHz,  $\text{CDCl}_3$ )  $\delta$  177.4, 166.6, 138.7, 138.3, 136.5, 128.5, 128.3, 128.3, 128.3, 128.1, 127.6, 125.8, 75.4, 66.1, 55.8, 53.1, 48.3, 47.1, 42.3, 40.2, 39.7, 39.2, 39.0, 38.7, 37.0, 36.8, 32.9, 30.8, 30.8, 28.1, 27.7, 24.4, 23.7, 23.6, 23.5, 21.3, 19.2, 18.2, 17.2, 17.1, 15.2. HRMS (ESI-MS,  $m/z$ )  $[\text{M} + \text{H}]^+$  calc. for  $\text{C}_{44}\text{H}_{60}\text{NO}_3$ : 650.4573, found: 650.4572.

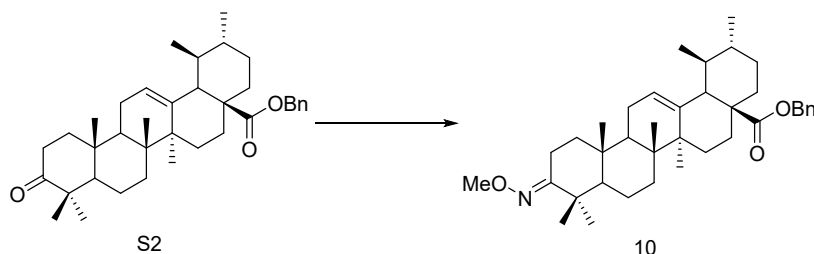

Following the procedure for preparation of 8 afforded 10 (19.80 g, 94%) as a white solid.  $^1\text{H}$  NMR (400 MHz,  $\text{CDCl}_3$ )  $\delta$  7.39 – 7.27 (m, 5H), 5.24 (t,  $J = 3.7$  Hz, 1H), 5.10 (d,  $J = 12.5$  Hz, 1H), 4.98 (d,  $J = 12.5$  Hz, 1H), 3.82 (s, 3H), 2.93 (ddd,  $J = 15.7, 5.6,$

3.4 Hz, 1H), 2.26 (d,  $J = 11.3$  Hz, 1H), 2.15 (ddd,  $J = 15.8, 12.4, 6.0$  Hz, 1H), 2.04 – 1.95 (m, 1H), 1.92 – 1.85 (m, 2H), 1.80 (dd,  $J = 13.9, 4.7$  Hz, 1H), 1.77 – 1.66 (m, 5H), 1.62 (dd,  $J = 13.3, 4.2$  Hz, 1H), 1.59 – 1.43 (m, 4H), 1.43 – 1.26 (m, 4H), 1.15 (s, 3H), 1.11 – 1.07 (m, 1H), 1.05 (s, 3H), 1.04 (s, 3H), 1.01 (s, 1H), 0.98 (s, 3H), 0.93 (d,  $J = 6.0$  Hz, 3H), 0.84 (d,  $J = 6.4$  Hz, 3H), 0.67 (s, 3H).  $^{13}\text{C}$  NMR (151 MHz,  $\text{CDCl}_3$ )  $\delta$  177.4, 166.1, 138.3, 136.5, 128.6, 128.3, 128.1, 125.8, 66.1, 61.2, 55.9, 53.1, 48.3, 47.2, 42.3, 40.0, 39.7, 39.2, 39.0, 38.8, 37.0, 36.8, 32.9, 30.8, 28.1, 27.6, 24.4, 23.7, 23.6, 23.5, 21.3, 19.2, 17.8, 17.2, 17.1, 15.2. HRMS (ESI-MS,  $m/z$ )  $[\text{M} + \text{Na}]^+$  calc. for  $\text{C}_{38}\text{H}_{56}\text{ON}_3$ : 574.4260, found: 574.4259.

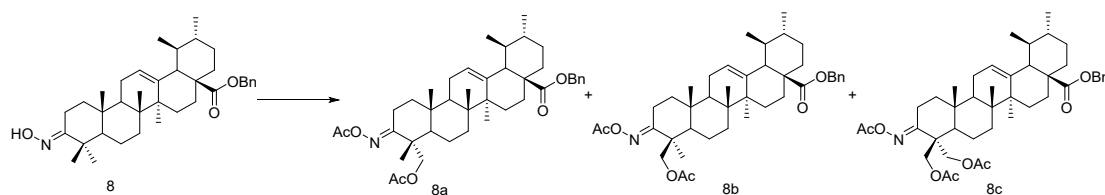

Oxime **8** (12 g, 21.5 mmol) was suspended in  $\text{Ac}_2\text{O}$  (50 mL) and  $\text{AcOH}$  (50 mL) and stirred for 1.5 h at 50 °C. Then,  $\text{Pd}(\text{OAc})_2$  (0.72 g, 3.21 mmol) and PIDA (9 g, 27.86 mmol) was added and the reaction mixture was stirred for 8 h at 50 °C. The reaction mixture was cooled to room temperature and concentrated in vacuo, the residue was extracted with DCM, the organic layer was washed with  $\text{H}_2\text{O}$  and brine, dried over  $\text{Na}_2\text{SO}_4$ , filtered, and concentrated in vacuo. Purification by column chromatography on silica gel (petroleum :  $\text{EtOAc} = 8 : 1$ ) to afforded **8a-b** (7.21 g, 51%) and **8c** (1.50 g, 10%) as a pale-yellow solid. Major isomer **8a**.  $^1\text{H}$  NMR (400 MHz,  $\text{DMSO}-d_6$ )  $\delta$  7.41 – 7.29 (m, 5H), 5.16 (q,  $J = 6.3, 4.8$  Hz, 1H), 5.05 (d,  $J = 12.5$  Hz, 1H), 4.96 (d,  $J = 12.5$  Hz, 1H), 4.13 (d,  $J = 11.0$  Hz, 1H), 4.00 (d,  $J = 11.0$  Hz, 1H), 2.72 – 2.60 (m, 1H), 2.59 – 2.52 (m, 1H), 2.25 (d,  $J = 4.8$  Hz, 1H), 2.23 – 2.14 (m, 2H), 2.11 (d,  $J = 1.7$  Hz, 3H), 2.02 (dd,  $J = 13.1, 4.1$  Hz, 1H), 1.97 (s, 3H), 1.95 (s, 1H), 1.92 – 1.75 (m, 2H), 1.75 – 1.63 (m, 3H), 1.60 (d,  $J = 13.0$  Hz, 3H), 1.55 – 1.48 (m, 2H), 1.48 – 1.29 (m, 8H), 1.29 – 1.11 (m, 6H), 1.07 (s, 3H), 1.04 (s, 3H), 1.02 (d,  $J = 6.5$  Hz, 2H), 0.91 (s, 3H), 0.89 (s, 3H), 0.84 (dd,  $J = 6.8, 2.6$  Hz, 1H), 0.83 – 0.78 (m, 3H), 0.58 (d,  $J = 6.0$  Hz, 3H).  $^{13}\text{C}$  NMR (151 MHz,  $\text{CDCl}_3$ )  $\delta$  177.3, 171.0, 170.6, 169.8, 138.3, 136.3, 128.4, 128.2, 128.0, 125.4, 68.3, 66.0, 53.0, 48.4, 48.2, 48.1, 46.6, 43.8, 42.2, 39.5, 39.4, 39.1, 38.8, 38.8, 37.2, 36.6, 36.4, 32.3, 30.7, 27.9, 24.2, 23.4, 23.4, 21.1, 20.6, 20.4, 20.0, 19.4, 19.3, 17.0, 15.5. HRMS (ESI-MS,  $m/z$ )  $[\text{M} + \text{Na}]^+$  calc. for  $\text{C}_{41}\text{H}_{57}\text{NNaO}_6$ : 682.4084, found: 682.4083. **8c**  $^1\text{H}$  NMR (600 MHz,  $\text{DMSO}-d_6$ )  $\delta$  7.39 – 7.31 (m, 5H), 5.16 (t,  $J = 3.6$  Hz, 1H), 5.05 (d,  $J = 12.6$  Hz, 1H), 4.96 (d,  $J = 12.5$  Hz, 1H), 4.62 (d,  $J = 11.8$  Hz, 1H), 4.37 (d,  $J = 11.4$  Hz, 1H), 4.28 (d,  $J = 11.4$  Hz, 1H), 4.01 – 3.97 (m,

1H), 2.86 (dd,  $J = 5.7, 3.0$  Hz, 1H), 2.41 – 2.31 (m, 1H), 2.21 – 2.17 (m, 1H), 2.11 (s, 3H), 2.02 (dd,  $J = 13.3, 4.5$  Hz, 1H), 1.98 (s, 3H), 1.95 (s, 3H), 1.92 – 1.85 (m, 1H), 1.84 – 1.78 (m, 1H), 1.78 – 1.66 (m, 3H), 1.63 – 1.57 (m, 3H), 1.57 – 1.48 (m, 4H), 1.47 – 1.42 (m, 2H), 1.38 (t,  $J = 10.7$  Hz, 4H), 1.31 – 1.20 (m, 3H), 1.08 (dq,  $J = 13.4, 6.7, 6.1$  Hz, 2H), 1.04 (s, 3H), 0.98 (s, 3H), 0.95 (d,  $J = 7.5$  Hz, 1H), 0.91 (d,  $J = 6.0$  Hz, 3H), 0.88 – 0.83 (m, 1H), 0.81 (d,  $J = 6.4$  Hz, 3H), 0.58 (s, 3H).  $^{13}\text{C}$  NMR (151 MHz, DMSO- $d_6$ )  $\delta$  176.0, 170.1, 167.0, 168.5, 166.3, 137.8, 136.2, 128.4, 127.9, 127.9, 124.8, 65.3, 63.3, 62.5, 52.6, 49.0, 47.9, 47.5, 46.3, 41.6, 40.1, 38.9, 38.4, 38.3, 36.8, 36.2, 35.8, 32.3, 30.0, 27.3, 23.8, 23.1, 23.1, 20.9, 20.6, 20.5, 19.6, 19.6, 18.4, 16.9, 16.6, 14.9. HRMS (ESI-MS,  $m/z$ )  $[\text{M} + \text{H}]^+$  calc. for  $\text{C}_{43}\text{H}_{60}\text{NO}_8$ : 718.4319, found: 718.4346.

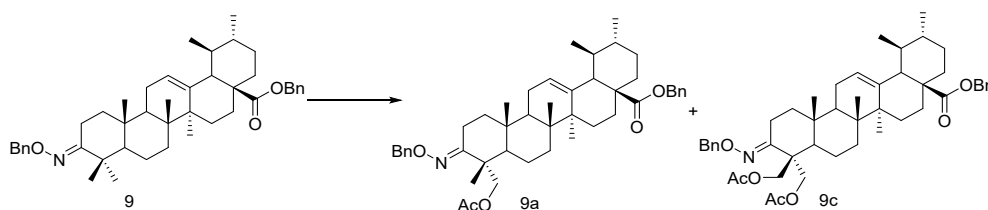

Following the procedure for preparation of **8a-c**, C–H oxidation of **9** with  $\text{Pd}(\text{OAc})_2$  /PIDA gave **9a** and **9c** as a white solid with 11.5% and 15.2% yields, respectively. **9a**  $^1\text{H}$  NMR (400 MHz,  $\text{CDCl}_3$ )  $\delta$  7.33 (tt,  $J = 6.9, 3.7$  Hz, 10H), 5.25 (d,  $J = 3.8$  Hz, 1H), 5.10 (d,  $J = 12.5$  Hz, 1H), 5.05 (s, 2H), 4.98 (d,  $J = 12.4$  Hz, 1H), 4.15 (d,  $J = 10.7$  Hz, 1H), 4.00 (d,  $J = 10.7$  Hz, 1H), 2.82 (ddd,  $J = 17.3, 6.7, 2.8$  Hz, 1H), 2.35 (td,  $J = 11.2, 10.6, 5.8$  Hz, 1H), 2.27 (d,  $J = 11.4$  Hz, 1H), 2.00 (dd,  $J = 15.2, 10.8$  Hz, 1H), 1.92 (s, 4H), 1.88 (dd,  $J = 11.1, 3.4$  Hz, 2H), 1.83 – 1.66 (m, 5H), 1.66 – 1.55 (m, 7H), 1.50 (td,  $J = 11.2, 5.1$  Hz, 3H), 1.45 – 1.22 (m, 10H), 1.10 (d,  $J = 6.6$  Hz, 2H), 1.06 (s, 3H), 1.04 (s, 3H), 0.93 (d,  $J = 4.1$  Hz, 6H), 0.85 (d,  $J = 6.4$  Hz, 3H), 0.67 (s, 3H).  $^{13}\text{C}$  NMR (151 MHz,  $\text{CDCl}_3$ )  $\delta$  177.4, 171.2, 162.0, 138.8, 138.3, 136.49, 128.6, 128.3, 128.2, 128.1, 127.6, 125.8, 75.6, 68.9, 66.1, 53.2, 48.4, 48.3, 46.6, 42.8, 42.3, 39.6, 39.3, 39.0, 37.1, 36.7, 36.5, 32.6, 30.8, 29.9, 28.0, 24.4, 23.5, 21.3, 21.1, 20.1, 19.3, 19.2, 17.2, 17.1, 15.1. HRMS (ESI-MS,  $m/z$ )  $[\text{M} + \text{H}]^+$  calc. for  $\text{C}_{46}\text{H}_{62}\text{NO}_5$ : 708.4628, found: 702.4626. **9c**  $^1\text{H}$  NMR (400 MHz,  $\text{CDCl}_3$ )  $\delta$  7.35 (h,  $J = 5.7, 4.5$  Hz, 11H), 5.27 (d,  $J = 9.7$  Hz, 1H), 5.18 – 5.11 (m, 1H), 5.06 (d,  $J = 4.8$  Hz, 2H), 5.05 – 4.97 (m, 1H), 4.61 (dd,  $J = 13.3, 9.4$  Hz, 1H), 4.54 – 4.44 (m, 1H), 4.19 (dd,  $J = 13.0, 9.0$  Hz, 1H), 3.95 (dd,  $J = 13.1, 9.4$  Hz, 1H), 3.03 (d,  $J = 16.9$  Hz, 1H), 2.26 (dt,  $J = 18.9, 11.0$  Hz, 2H), 2.10 – 1.99 (m, 1H), 1.96 (d,  $J = 4.1$  Hz, 3H), 1.94 (dd,  $J = 4.9, 3.0$  Hz, 2H), 1.90 (d,  $J = 4.0$  Hz, 3H), 1.88 – 1.84 (m, 1H), 1.83 – 1.69 (m, 4H), 1.51 (s, 3H), 1.47 – 1.23 (m, 7H), 1.12 (d,  $J = 8.1$  Hz, 1H), 1.08 (d,  $J = 5.8$  Hz, 3H), 1.04 (d,  $J = 5.8$  Hz, 3H), 0.93 (d,  $J = 4.1$  Hz, 6H), 0.85 (d,  $J = 6.4$  Hz, 3H), 0.67 (s, 3H).

= 4.5 Hz, 3H), 1.01 (d,  $J = 4.1$  Hz, 1H), 0.96 (t,  $J = 8.1$  Hz, 4H), 0.88 (d,  $J = 6.6$  Hz, 3H), 0.70 – 0.62 (m, 3H).  $^{13}\text{C}$  NMR (151 MHz,  $\text{CDCl}_3$ )  $\delta$  177.4, 171.0, 170.9, 157.5, 138.7, 138.3, 136.5, 128.6, 128.4, 128.3, 128.2, 128.1, 127.6, 125.6, 75.8, 66.2, 64.9, 64.0, 53.1, 49.7, 48.3, 47.1, 47.1, 42.2, 39.5, 39.2, 39.0, 37.4, 36.7, 36.4, 33.0, 30.8, 29.9, 28.0, 24.3, 23.6, 23.5, 21.3, 21.1, 20.9, 19.2, 18.8, 17.1, 17.1, 15.4. HRMS (ESI-MS,  $m/z$ )  $[\text{M} + \text{H}]^+$  calc. for  $\text{C}_{48}\text{H}_{64}\text{NO}_7$ : 766.4683, found: 766.4681.

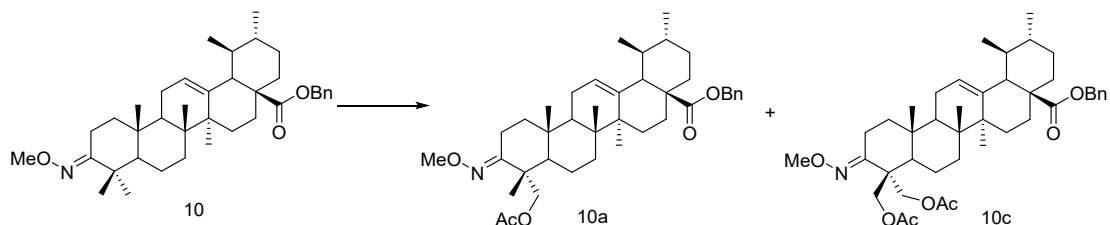

Following the procedure for preparation of **8a-c**, C–H oxidation of **10** with  $\text{Pd}(\text{OAc})_2/\text{PIDA}$  gave **10a** and **10c** as a white solid with 18.2% and 9.2% yields, respectively. **10a**  $^1\text{H}$  NMR (400 MHz,  $\text{CDCl}_3$ )  $\delta$  7.34 (d,  $J = 5.6$  Hz, 5H), 5.25 (t,  $J = 3.7$  Hz, 1H), 5.10 (d,  $J = 12.4$  Hz, 1H), 4.98 (d,  $J = 12.5$  Hz, 1H), 4.14 (d,  $J = 10.7$  Hz, 1H), 4.06 (d,  $J = 10.7$  Hz, 1H), 3.79 (s, 3H), 2.73 (ddd,  $J = 17.2, 6.8, 2.9$  Hz, 1H), 2.37 – 2.23 (m, 2H), 2.00 (d,  $J = 4.9$  Hz, 1H), 1.96 (d,  $J = 7.0$  Hz, 1H), 1.93 – 1.84 (m, 2H), 1.84 – 1.66 (m, 5H), 1.61 (td,  $J = 13.1, 4.0$  Hz, 2H), 1.56 – 1.48 (m, 2H), 1.48 – 1.43 (m, 1H), 1.43 – 1.35 (m, 4H), 1.35 – 1.23 (m, 5H), 1.17 – 1.07 (m, 2H), 1.06 (d,  $J = 2.3$  Hz, 6H), 1.00 (d,  $J = 12.8$  Hz, 2H), 0.94 (s, 3H), 0.93 (d,  $J = 6.1$  Hz, 3H), 0.85 (d,  $J = 6.4$  Hz, 3H), 0.67 (s, 3H).  $^{13}\text{C}$  NMR (101 MHz,  $\text{CDCl}_3$ )  $\delta$  177.4, 171.1, 161.4, 138.3, 136.5, 128.5, 128.3, 128.1, 125.8, 69.0, 66.1, 61.5, 53.2, 48.5, 48.3, 46.6, 42.6, 42.3, 39.6, 39.2, 39.0, 37.1, 36.7, 36.5, 32.6, 30.8, 28.0, 24.4, 23.5, 21.3, 21.1, 20.0, 19.4, 18.9, 17.2, 17.1, 15.1. HRMS (ESI-MS,  $m/z$ )  $[\text{M} + \text{H}]^+$  calc. for  $\text{C}_{40}\text{H}_{58}\text{NO}_5$ : 632.4315, found: 632.4317. **10c**  $^1\text{H}$  NMR (400 MHz,  $\text{DMSO}-d_6$ )  $\delta$  7.34 (q,  $J = 7.3, 6.7$  Hz, 5H), 5.15 (d,  $J = 3.9$  Hz, 1H), 5.04 (d,  $J = 12.5$  Hz, 1H), 4.95 (d,  $J = 12.5$  Hz, 1H), 4.56 (d,  $J = 11.6$  Hz, 1H), 4.30 (d,  $J = 11.1$  Hz, 1H), 4.22 (d,  $J = 11.1$  Hz, 1H), 3.91 (d,  $J = 11.6$  Hz, 1H), 3.70 (s, 3H), 3.17 (d,  $J = 5.2$  Hz, 2H), 2.85 – 2.72 (m, 1H), 2.18 (d,  $J = 11.1$  Hz, 2H), 2.14 – 1.99 (m, 4H), 1.98 (s, 3H), 1.96 (s, 3H), 1.88 (d,  $J = 5.3$  Hz, 1H), 1.80 (d,  $J = 11.5$  Hz, 1H), 1.76 – 1.65 (m, 3H), 1.60 (d,  $J = 13.1$  Hz, 5H), 1.54 – 1.20 (m, 14H), 1.03 (s, 4H), 0.96 (s, 4H), 0.91 (d,  $J = 4.7$  Hz, 5H), 0.81 (d,  $J = 6.3$  Hz, 3H), 0.58 (s, 3H).  $^{13}\text{C}$  NMR (151 MHz,  $\text{DMSO}-d_6$ )  $\delta$  176.1, 170.0, 156.9, 137.8, 137.1, 136.2, 130.7, 128.4, 127.9, 127.9, 127.7, 124.9, 94.9, 65.3, 63.9, 62.9, 61.2, 52.6, 49.0, 47.5, 46.7, 46.3, 41.6, 40.1, 38.9, 38.4, 38.3, 36.6, 36.2, 35.7, 32.4, 30.0, 27.3, 23.8, 23.1, 20.9, 20.7, 20.6, 18.4, 18.1, 16.9, 16.7, 14.7. HRMS (ESI-MS,  $m/z$ )  $[\text{M} + \text{H}]^+$  calc. for  $\text{C}_{42}\text{H}_{60}\text{NO}_7$ : 690.4370, found: 690.4371.

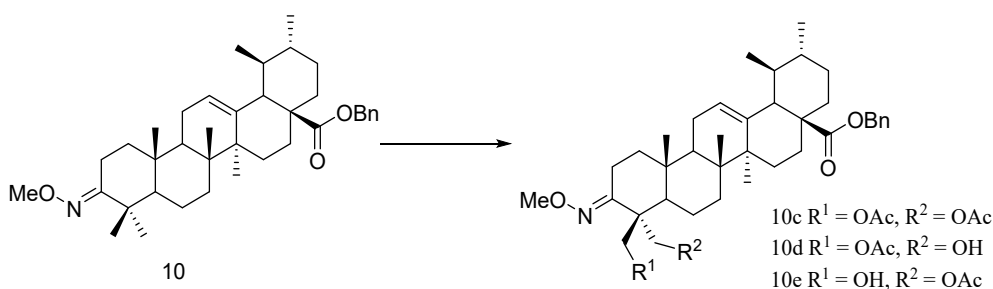

To a solution of the oxime **10** (1.0 g, 1.74 mmol) in AcOH (6 mL), Pd(OAc)<sub>2</sub> (59 mg, 0.26 mmol) and PIDA (953 mg, 2.96 mmol) was added and the reaction mixture was stirred for 8 h at 50 °C. The reaction mixture was cooled to room temperature and concentrated in vacuo, the residue was extracted with DCM, the organic layer was washed with H<sub>2</sub>O and brine, dried over Na<sub>2</sub>SO<sub>4</sub>, filtered, and concentrated in vacuo. Purification by column chromatography on silica gel (petroleum : EtOAc = 3 : 1) to afforded **10c-e** (0.15 g, 0.28 g and 0.26 g) as a pale-yellow solid with 12.3%, 23.1 and 24.6% yields, respectively. **10d** <sup>1</sup>H NMR (600 MHz, DMSO-*d*<sub>6</sub>) δ 7.32 (dp, *J* = 12.2, 7.2 Hz, 5H), 5.16 (d, *J* = 3.9 Hz, 1H), 5.05 (d, *J* = 12.6 Hz, 1H), 4.94 (d, *J* = 12.6 Hz, 1H), 4.43 (t, *J* = 5.9 Hz, 1H), 4.38 (d, *J* = 11.4 Hz, 1H), 3.94 (d, *J* = 11.4 Hz, 1H), 3.72 (s, 3H), 3.70 (d, *J* = 5.5 Hz, 1H), 3.37 (dd, *J* = 10.8, 6.4 Hz, 1H), 2.63 (dd, *J* = 16.6, 6.0 Hz, 1H), 2.20 (dd, *J* = 16.7, 11.3 Hz, 2H), 2.06 – 1.96 (m, 1H), 1.93 (s, 3H), 1.88 (t, *J* = 5.2 Hz, 1H), 1.82 – 1.69 (m, 2H), 1.69 – 1.57 (m, 5H), 1.57 – 1.39 (m, 5H), 1.39 – 1.24 (m, 3H), 1.21 (d, *J* = 12.7 Hz, 2H), 1.04 (s, 3H), 1.01 (dd, *J* = 12.8, 4.4 Hz, 2H), 0.91 (d, *J* = 4.6 Hz, 6H), 0.81 (d, *J* = 6.3 Hz, 3H), 0.60 (s, 3H). <sup>13</sup>C NMR (151 MHz, DMSO-*d*<sub>6</sub>) δ 176.1, 170.1, 158.2, 137.9, 137.1, 136.2, 130.7, 128.4, 127.9, 127.7, 125.1, 65.3, 63.9, 61.0, 52.6, 48.0, 47.9, 47.5, 45.7, 41.7, 40.1, 38.9, 38.40, 38.3, 36.2, 36.1, 35.5, 32.3, 30.0, 27.3, 23.8, 23.2, 23.2, 20.9, 20.7, 18.9, 18.6, 16.9, 16.7, 14.6. HRMS (ESI-MS, *m/z*) [*M* + *H*]<sup>+</sup> calc. for C<sub>40</sub>H<sub>58</sub>NO<sub>6</sub>: 648.4264, found: 648.4265. **10e** <sup>1</sup>H NMR (400 MHz, DMSO-*d*<sub>6</sub>) δ 7.38 – 7.27 (m, 6H), 5.15 (t, *J* = 3.6 Hz, 1H), 5.04 (d, *J* = 12.5 Hz, 1H), 4.95 (d, *J* = 12.5 Hz, 1H), 4.47 (s, 1H), 4.39 (d, *J* = 11.2 Hz, 1H), 4.15 (d, *J* = 11.2 Hz, 1H), 3.71 (s, 3H), 3.63 (d, *J* = 11.3 Hz, 1H), 3.49 (d, *J* = 11.5 Hz, 1H), 2.87 (dt, *J* = 13.9, 3.8 Hz, 1H), 2.24 – 2.13 (m, 2H), 2.09 – 2.01 (m, 1H), 1.99 (s, 3H), 1.94 – 1.83 (m, 2H), 1.83 – 1.75 (m, 1H), 1.69 (td, *J* = 13.4, 3.5 Hz, 3H), 1.59 (dd, *J* = 13.0, 3.9 Hz, 3H), 1.55 – 1.42 (m, 5H), 1.41 – 1.31 (m, 5H), 1.24 (d, *J* = 9.4 Hz, 4H), 1.02 (s, 3H), 0.98 (d, *J* = 4.5 Hz, 2H), 0.96 – 0.84 (m, 9H), 0.80 (d, *J* = 6.4 Hz, 4H), 0.57 (s, 3H). <sup>13</sup>C NMR (151 MHz, DMSO-*d*<sub>6</sub>) δ 176.1, 170.2, 158.6, 137.8, 136.2, 128.4, 127.9, 127.9, 125.0, 65.3, 64.3, 62.1, 60.9, 59.8, 52.6, 49.1, 48.4, 47.5, 46.6, 41.5, 40.1, 39.0, 38.4, 38.3, 37.5, 36.2, 35.9, 32.6, 31.1, 30.0, 29.8, 27.3, 23.8, 23.1,



23.0, 20.9, 20.8, 18.7, 18.0, 16.9, 16.6, 14.9, 14.1. HRMS (ESI-MS,  $m/z$ )  $[M + H]^+$  calc. for  $C_{40}H_{58}NO_6$ : 648.4264, found: 648.4263.

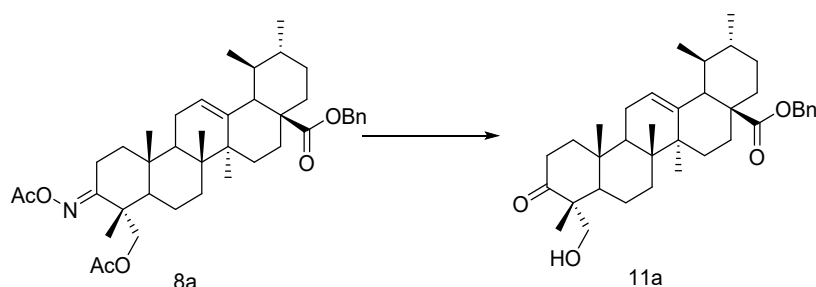

To a solution Oxime **8a** (8.2 g, 12.6 mmol) in MeOH (126 mL),  $K_2CO_3$  (870 mg, 6.3 mmol) was added and the mixture was stirred for 1.5 h at 60 °C. Then, AcOH (720  $\mu$ L, 12.6 mmol) was added. The mixture was stirred until gas evolution decreased. Then, a solution of  $CuSO_4 \cdot 5H_2O$  (15.7g, 62.8 mmol) in water (126 mL) and THF (126 mL) was added. The mixture was stirred at 60 °C for 9 h. After the reaction mixture was cooled to room temperature and extracted with DCM (3 x 500 mL), the organic layer was washed  $H_2O$  and brine, dried over  $Na_2SO_4$ , and concentrated in vacuo. Purification by column chromatography on silica gel (petroleum : EtOAc = 5 : 1) afforded **11a** (4.2 g, 59%) as a white solid.  $^1H$  NMR (400 MHz,  $DMSO-d_6$ )  $\delta$  7.42 – 7.27 (m, 5H), 5.18 (t,  $J = 3.5$  Hz, 1H), 5.05 (d,  $J = 12.5$  Hz, 1H), 4.96 (d,  $J = 12.5$  Hz, 1H), 4.83 (t,  $J = 5.4$  Hz, 1H), 3.18 (dd,  $J = 10.3, 5.1$  Hz, 1H), 2.32 (dd,  $J = 9.0, 5.9$  Hz, 2H), 2.20 (d,  $J = 11.2$  Hz, 1H), 2.01 (td,  $J = 13.2, 4.1$  Hz, 1H), 1.91 (td,  $J = 9.8, 7.9, 4.0$  Hz, 2H), 1.78 (tdd,  $J = 27.4, 14.5, 8.0$  Hz, 4H), 1.60 (td,  $J = 11.4, 4.4$  Hz, 5H), 1.56 – 1.47 (m, 3H), 1.50 – 1.41 (m, 3H), 1.39 (s, 4H), 1.35 – 1.19 (m, 9H), 1.08 (s, 4H), 1.05 (d,  $J = 12.9$  Hz, 4H), 0.99 – 0.92 (m, 2H), 0.93 (d,  $J = 7.1$  Hz, 5H), 0.85 (s, 8H), 0.86 – 0.79 (m, 9H), 0.78 (s, 4H), 0.61 (s, 3H).  $^{13}C$  NMR (151 MHz,  $DMSO-d_6$ )  $\delta$  216.2, 176.1, 137.8, 136.2, 128.4, 127.9, 127.9, 125.2, 67.0, 65.4, 52.7, 51.5, 47.5, 45.9, 45.4, 41.8, 40.1, 39.0, 38.4, 38.4, 37.1, 36.2, 35.6, 35.5, 31.8, 27.4, 23.8, 23.2, 23.1, 20.9, 19.1, 17.3, 16.9, 16.6, 15.1. HRMS (ESI-MS,  $m/z$ )  $[M + Na]^+$  calc. for  $C_{37}H_{52}O_3Na$ : 583.3763, found: 583.3762.

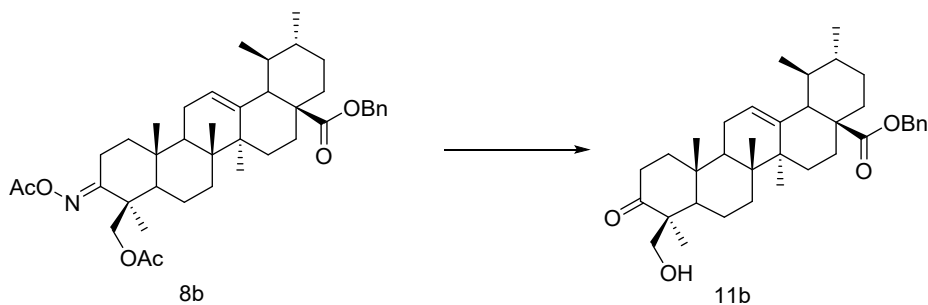

Oxime **8b** (2.0 g, 3.1 mmol) was dissolved in MeOH (31 mL) and  $K_2CO_3$  (210

mg, 1.5 mmol) was added and the reaction mixture was stirred for 1.5 h at 60 °C. Then, AcOH (180  $\mu$ L, 3.1 mmol) was added. The reaction mixture was stirred until gas evolution decreased. Then, a solution of CuSO<sub>4</sub>•5H<sub>2</sub>O (3.9 g, 15.4 mmol) in water (31 mL) and THF (31 mL) was added. The reaction mixture was stirred at 60 °C for 9 h. After the reaction mixture was cooled to room temperature and extracted with DCM (3 x 100 mL), the organic layer was washed with H<sub>2</sub>O and brine, dried over Na<sub>2</sub>SO<sub>4</sub>, filtered, and concentrated in vacuo. Purification by column chromatography on silica gel (petroleum : EtOAc = 5 : 1) afforded **11b** (0.20 g, 12%) as a white solid. <sup>1</sup>H NMR (400 MHz, DMSO-*d*<sub>6</sub>)  $\delta$  7.39 – 7.31 (m, 6H), 5.15 (t, *J* = 3.9 Hz, 1H), 5.05 (d, *J* = 12.5 Hz, 1H), 4.96 (d, *J* = 12.5 Hz, 1H), 4.45 (d, *J* = 5.8 Hz, 1H), 3.84 (dd, *J* = 11.0, 4.4 Hz, 1H), 3.33 (s, 1H), 2.69 (td, *J* = 14.3, 6.1 Hz, 1H), 2.29 – 2.13 (m, 2H), 2.11 – 1.96 (m, 3H), 1.95 – 1.80 (m, 3H), 1.72 (dd, *J* = 16.0, 11.2 Hz, 2H), 1.60 (d, *J* = 13.2 Hz, 3H), 1.56 – 1.37 (m, 8H), 1.34 (s, 3H), 1.30 (s, 6H), 1.26 (s, 7H), 1.23 (s, 5H), 1.21 – 1.12 (m, 4H), 1.08 (s, 4H), 1.03 (s, 4H), 1.00 (s, 4H), 0.91 (s, 5H), 0.88 – 0.85 (m, 1H), 0.81 (d, *J* = 6.3 Hz, 3H), 0.58 (s, 3H). <sup>13</sup>C NMR (151 MHz, DMSO-*d*<sub>6</sub>)  $\delta$  213.7, 176.1, 137.9, 136.2, 128.4, 127.9, 124.8, 65.3, 63.8, 56.9, 54.1, 52.5, 47.4, 46.5, 43.7, 41.6, 40.1, 39.1, 38.4, 38.3, 36.3, 36.2, 35.8, 34.8, 32.8, 30.0, 27.4, 23.5, 23.2, 23.2, 20.9, 20.0, 19.2, 16.9, 16.9, 16.6, 15.3, 14.8. HRMS (ESI-MS, *m/z*) [M + Na]<sup>+</sup> calc. for C<sub>37</sub>H<sub>52</sub>O<sub>3</sub>Na: 583.3763, found: 583.3762.

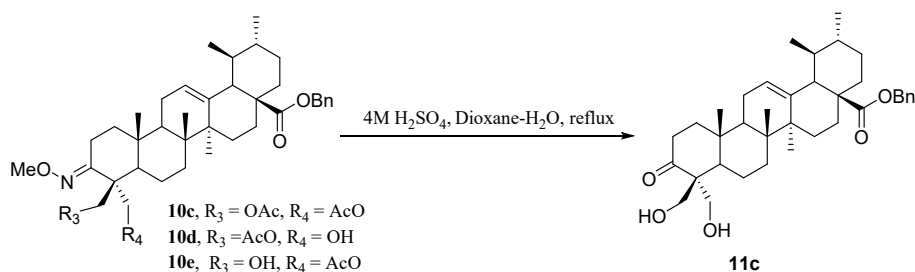

To a solution of the oxime **10d-e** (100 mg, 0.16 mmol) in dioxane (5 mL) and H<sub>2</sub>O (5 mL), 4M H<sub>2</sub>SO<sub>4</sub> was added and the mixture was stirred at 60 °C for 0.5 h. Then, the mixture was stirred at 80 °C for 1.5 h. After the reaction mixture was cooled to room temperature and extracted with DCM (3 x 500 mL), the organic layer was washed H<sub>2</sub>O and brine, dried over Na<sub>2</sub>SO<sub>4</sub>, and concentrated in vacuo. Purification by column chromatography on silica gel (petroleum : EtOAc = 2 : 1) afforded **11c** (65 mg, 71%) as a white solid. <sup>1</sup>H NMR (400 MHz, DMSO-*d*<sub>6</sub>)  $\delta$  7.41 – 7.29 (m, 5H), 5.17 (t, *J* = 3.6 Hz, 1H), 5.05 (d, *J* = 12.5 Hz, 1H), 4.96 (d, *J* = 12.6 Hz, 1H), 4.48 (t, *J* = 5.4 Hz, 1H), 4.32 (t, *J* = 5.5 Hz, 1H), 3.74 (dd, *J* = 10.5, 5.3 Hz, 1H), 3.59 (dd, *J* = 11.2, 5.3 Hz, 1H), 3.41 (dd, *J* = 11.2, 5.7 Hz, 1H), 3.21 (dd, *J* = 10.5, 5.6 Hz, 1H), 2.42 (ddd, *J* = 16.7, 12.2, 7.2 Hz, 1H), 2.24 – 2.11 (m, 3H), 2.08 – 1.94 (m, 2H), 1.92 (t, *J* = 4.0 Hz, 1H),

1.88 – 1.66 (m, 4H), 1.66 – 1.52 (m, 4H), 1.47 (dd,  $J = 18.2, 12.9$  Hz, 4H), 1.41 – 1.18 (m, 7H), 1.06 (s, 3H), 1.04 – 0.99 (m, 1H), 0.97 (s, 3H), 0.91 (d,  $J = 5.1$  Hz, 3H), 0.82 (d,  $J = 6.4$  Hz, 3H), 0.60 (s, 3H).  $^{13}\text{C}$  NMR (151 MHz,  $\text{DMSO-}d_6$ )  $\delta$  213.4, 176.1, 137.9, 136.2, 128.4, 128.0, 127.9, 125.1, 65.4, 62.9, 61.7, 57.7, 52.6, 47.7, 47.5, 45.8, 41.7, 40.1, 39.0, 38.4, 38.3, 37.6, 36.2, 35.8, 35.5, 32.4, 30.0, 27.4, 23.8, 23.3, 21.0, 18.8, 17.0, 16.7, 15.0. HRMS (ESI-MS,  $m/z$ )  $[\text{M} + \text{Na}]^+$  calc. for  $\text{C}_{37}\text{H}_{52}\text{O}_5\text{Na}$ : 599.3707, found: 599.3711.

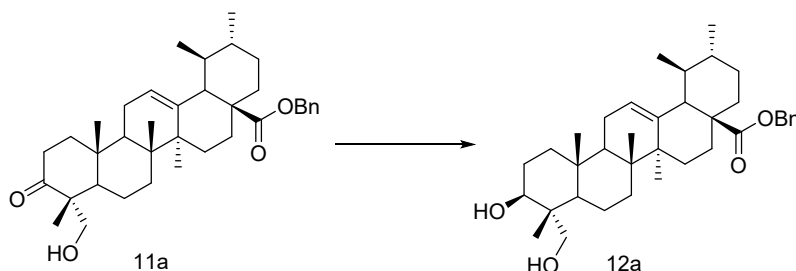

Compound **11a** (3.0 g, 5.4 mmol) was dissolved in MeOH (30 mL).  $\text{NaBH}_4$  (240 mg, 6.4 mmol) was added in 0 °C. The reaction solution was stirred for 2 h at room temperature. The reaction solution was quenched by saturated  $\text{NH}_4\text{Cl}$  and extracted with EA (3 x 100 mL), the organic layer was washed with  $\text{H}_2\text{O}$  and brine, dried over  $\text{Na}_2\text{SO}_4$ , and concentrated in vacuo. Purification by column chromatography on silica gel (petroleum : EtOAc = 3 : 1) afforded **12a** (2.2 g, 74%) as a white solid.  $^1\text{H}$  NMR (600 MHz,  $\text{MeOD-}d_4$ )  $\delta$  5.23 (d,  $J = 3.7$  Hz, 1H), 3.61 (d,  $J = 11.6, 4.9$  Hz, 1H), 3.53 (d,  $J = 10.9$  Hz, 1H), 3.29 (d, overlapped, 1H), 2.20 (d,  $J = 11.3$  Hz, 1H), 2.04 (d,  $J = 4.3$  Hz, 1H), 1.92 (dd,  $J = 10.4, 4.0$  Hz, 3H), 1.65 (d,  $J = 11.5$  Hz, 9H), 1.54 – 1.41 (m, 3H), 1.37 (d,  $J = 11.2$  Hz, 4H), 1.30 (d,  $J = 9.7$  Hz, 8H), 1.27 (s, 3H), 1.15 (d,  $J = 11.4$  Hz, 2H), 1.13 (s, 3H), 1.09 (dt,  $J = 13.6, 3.4$  Hz, 1H), 1.01 (d,  $J = 10.5$  Hz, 1H), 0.99 (s, 3H), 0.96 (d,  $J = 5.6$  Hz, 3H), 0.91 (d,  $J = 6.2$  Hz, 1H), 0.89 (d,  $J = 6.3$  Hz, 3H), 0.85 (s, 3H), 0.71 (s, 3H).  $^{13}\text{C}$  NMR (151 MHz,  $\text{MeOD-}d_4$ )  $\delta$  181.6, 139.7, 126.9, 73.9, 67.4, 54.4, 49.4, 49.3, 49.1, 49.0, 48.9, 48.7, 48.6, 43.3, 43.3, 40.7, 40.4, 39.7, 38.1, 37.9, 33.8, 32.2, 31.8, 30.8, 30.8, 30.1, 29.2, 27.5, 25.3, 24.4, 24.1, 21.6, 19.1, 17.8, 17.7, 16.4, 12.8. HRMS (ESI-MS,  $m/z$ )  $[\text{M} + \text{Na}]^+$  calc. for  $\text{C}_{37}\text{H}_{52}\text{O}_3\text{Na}$ : 585.3920, found: 585.3917.

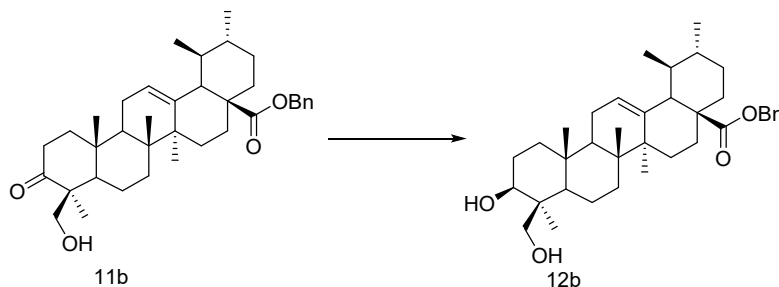

Following the procedure for preparation of **12a**, reduction of **11b** with NaBH<sub>4</sub> gave **12b** as a white solid (75% yield). <sup>1</sup>H NMR (600 MHz, DMSO-*d*<sub>6</sub>) δ 7.38 – 7.28 (m, 5H), 5.13 (t, *J* = 3.7 Hz, 1H), 5.03 (d, *J* = 12.5 Hz, 1H), 4.95 (s, 1H), 4.93 (d, *J* = 6.8 Hz, 1H), 4.05 (dd, *J* = 7.5, 2.9 Hz, 1H), 3.81 (dd, *J* = 11.0, 3.0 Hz, 1H), 3.24 (dd, *J* = 11.0, 7.5 Hz, 1H), 3.15 (dt, *J* = 11.6, 4.6 Hz, 1H), 2.17 (d, *J* = 11.3 Hz, 1H), 1.98 (dt, *J* = 13.4, 6.7 Hz, 1H), 1.84 (dt, *J* = 18.2, 5.5 Hz, 1H), 1.71 (d, *J* = 12.4, 3.9 Hz, 2H), 1.61 – 1.57 (m, 2H), 1.53 (dd, *J* = 13.5, 4.4 Hz, 2H), 1.51 – 1.48 (m, 2H), 1.42 (td, *J* = 11.9, 4.9 Hz, 2H), 1.35 (d, *J* = 6.5 Hz, 2H), 1.30 – 1.25 (m, 2H), 1.22 (d, *J* = 4.6 Hz, 2H), 1.20 – 1.10 (m, 2H), 1.05 (s, 3H), 1.02 (s, 3H), 0.90 (s, 3H), 0.81 (d, *J* = 6.9 Hz, 6H), 0.51 (s, 3H). <sup>13</sup>C NMR (151 MHz, DMSO-*d*<sub>6</sub>) δ 176.5, 138.2, 136.7, 128.8, 128.4, 125.5, 79.1, 65.8, 63.5, 55.8, 53.0, 47.9, 47.5, 42.6, 42.0, 41.3, 40.5, 38.9, 38.8, 38.6, 36.7, 36.7, 33.5, 32.0, 30.5, 29.9, 29.0, 27.8, 27.7, 24.3, 23.7, 23.5, 23.4, 23.0, 21.4, 20.4, 19.8, 19.7, 19.0, 17.4, 17.0, 16.0, 11.7. HRMS (ESI-MS, *m/z*) [M + Na]<sup>+</sup> calc. for C<sub>37</sub>H<sub>52</sub>O<sub>3</sub>Na: 585.3920, found: 585.3925.

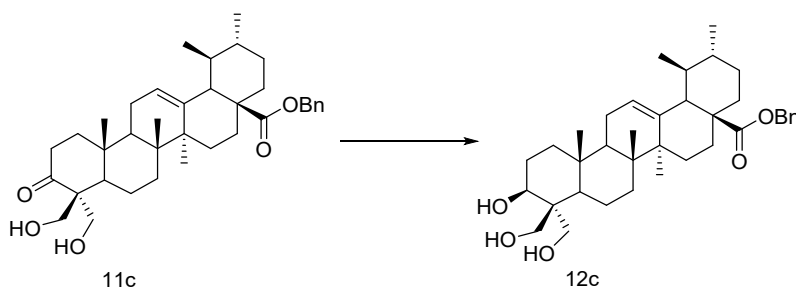

Following the procedure for preparation of **12a**, reduction of **11c** with NaBH<sub>4</sub> gave **12c** as a white solid (70%). <sup>1</sup>H NMR (600 MHz, CDCl<sub>3</sub>) δ 7.37 – 7.27 (m, 5H), 5.22 (t, *J* = 3.7 Hz, 1H), 5.09 (d, *J* = 12.4 Hz, 1H), 4.97 (d, *J* = 12.4 Hz, 1H), 4.32 (d, *J* = 11.7 Hz, 1H), 4.16 (d, *J* = 11.3 Hz, 1H), 3.74 (dt, *J* = 30.9, 12.1 Hz, 3H), 2.25 (dd, *J* = 11.3, 1.7 Hz, 1H), 1.99 (td, *J* = 13.4, 12.9, 4.5 Hz, 1H), 1.89 (dd, *J* = 6.3, 4.3 Hz, 1H), 1.80 (ddd, *J* = 20.9, 11.0, 4.4 Hz, 2H), 1.73 (dt, *J* = 14.6, 5.1 Hz, 3H), 1.70 – 1.65 (m, 2H), 1.65 – 1.61 (m, 1H), 1.60 (d, *J* = 4.3 Hz, 1H), 1.59 – 1.53 (m, 1H), 1.47 (dq, *J* = 10.3, 5.9, 4.9 Hz, 2H), 1.42 (dd, *J* = 12.8, 4.1 Hz, 1H), 1.30 (dd, *J* = 9.3, 6.4 Hz, 6H), 1.05 (s, 3H), 1.03 – 0.99 (m, 1H), 0.99 – 0.95 (m, 1H), 0.93 (d, *J* = 6.3 Hz, 3H), 0.90 – 0.86 (m, 2H), 0.85 (s, 3H), 0.84 (d, *J* = 6.4 Hz, 3H), 0.59 (s, 3H). <sup>13</sup>C NMR (151 MHz, CDCl<sub>3</sub>) δ 177.4, 138.2, 136.5, 128.5, 128.3, 128.1, 125.5, 78.0, 71.2, 64.0, 53.0, 51.7, 48.2, 47.7, 45.9, 42.1, 39.6, 39.2, 39.0, 38.4, 36.7, 36.7, 33.2, 30.8, 29.8, 28.0, 26.9, 24.3, 23.7, 23.6, 21.3, 18.9, 17.1, 17.0, 15.8. HRMS (ESI-MS, *m/z*) [M + Na]<sup>+</sup> calc. for C<sub>37</sub>H<sub>54</sub>O<sub>5</sub>Na: 601.3869, found: 601.3871.

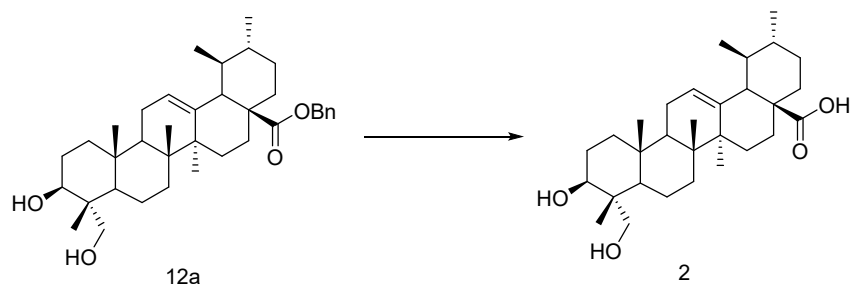

Compound **12a** (0.50 g, 0.88 mmol) was dissolved in THF (20 mL). 10% Pd/C (50 mg) was added. The reaction mixture was stirred overnight at room temperature under H<sub>2</sub> at atmospheric pressure. The reaction mixture was filtered through Celite and washed with THF; the organic layer was concentrated in vacuo. Purification by column chromatography on silica gel (DCM : MeOH = 20 : 1) afforded **2** (0.41 g, 99%) as a white solid. <sup>1</sup>H NMR (600 MHz, DMSO-*d*<sub>6</sub>) δ 11.93 (s, 1H), 5.13 (t, *J* = 3.6 Hz, 1H), 4.40 (s, 1H), 4.15 (s, 1H), 3.44 (dd, *J* = 11.4, 5.2 Hz, 1H), 3.33 (s, 1H), 3.07 (d, *J* = 10.5 Hz, 1H), 2.11 (d, *J* = 11.3 Hz, 1H), 1.92 (qd, *J* = 12.1, 10.9, 3.4 Hz, 1H), 1.88 – 1.75 (m, 3H), 1.65 – 1.35 (m, 10H), 1.36 – 1.15 (m, 4H), 1.11 (d, *J* = 11.4 Hz, 1H), 1.04 (s, 3H), 1.02 – 0.96 (m, 1H), 0.91 (d, *J* = 5.3 Hz, 3H), 0.89 (s, 3H), 0.82 (d, *J* = 6.4 Hz, 3H), 0.75 (s, 3H), 0.54 (s, 3H). <sup>13</sup>C NMR (151 MHz, MeOD-*d*<sub>4</sub>) δ 181.8, 139.9, 127.1, 74.1, 67.6, 54.6, 43.5, 43.5, 41.0, 40.6, 39.9, 38.3, 38.1, 34.0, 32.4, 32.0, 31.0, 31.0, 30.3, 29.4, 27.7, 25.5, 24.6, 24.4, 21.8, 19.3, 18.1, 17.9, 16.6, 13.0. HRMS (ESI-MS, *m/z*) [M + Na]<sup>+</sup> calc. for C<sub>30</sub>H<sub>47</sub>O<sub>4</sub>Na: 495.3450, found: 495.3448. The NMR spectrograms are almost same with that of reported isolated natural product <sup>1</sup>.

Table S1. Comparison of <sup>13</sup>C NMR data of isolated and herein prepared 3β, 23-dihydroxyurs-12-en-28-oic acid

| Carbon No. | Synthetic<br>δ <sub>c</sub> (ppm) | Natural<br>δ <sub>c</sub> (ppm) | Err (Natural- Synthetic)<br>Δδ <sub>c</sub> (ppm) |
|------------|-----------------------------------|---------------------------------|---------------------------------------------------|
| 1          | 38.8                              | 38.8                            | 0                                                 |
| 2          | 27.6                              | 27.6                            | 0                                                 |
| 3          | 73.3                              | 73.5                            | 0.2                                               |
| 4          | 42.4                              | 42.4                            | 0                                                 |
| 5          | 48.0                              | 48.0                            | 0                                                 |
| 6          | 18.5                              | 18.5                            | 0                                                 |
| 7          | 33.2                              | 33.2                            | 0                                                 |
| 8          | 39.9                              | 39.9                            | 0                                                 |
| 9          | 48.0                              | 48.0                            | 0                                                 |
| 10         | 37.0                              | 37.0                            | 0                                                 |
| 11         | 23.5                              | 23.6                            | 0.1                                               |
| 12         | 125.6                             | 125.6                           | 0                                                 |
| 13         | 139.2                             | 139.2                           | 0                                                 |
| 14         | 42.8                              | 42.7                            | -0.1                                              |
| 15         | 28.6                              | 28.6                            | 0                                                 |
| 16         | 24.8                              | 24.8                            | 0                                                 |
| 17         | 48.4                              | 48.6                            | 0.2                                               |

|    |       |       |      |
|----|-------|-------|------|
| 18 | 53.5  | 53.5  | 0    |
| 19 | 39.4  | 39.4  | 0    |
| 20 | 39.3  | 39.3  | 0    |
| 21 | 31.0  | 31.0  | 0    |
| 22 | 37.4  | 37.3  | -0.1 |
| 23 | 67.8  | 68.1  | 0.3  |
| 24 | 13.1  | 13.0  | -0.1 |
| 25 | 16.0  | 16.0  | 0    |
| 26 | 17.4  | 17.4  | 0    |
| 27 | 23.8  | 23.8  | 0    |
| 28 | 179.8 | 179.7 | -0.1 |
| 29 | 17.4  | 17.4  | 0    |
| 30 | 21.3  | 21.2  | -0.1 |

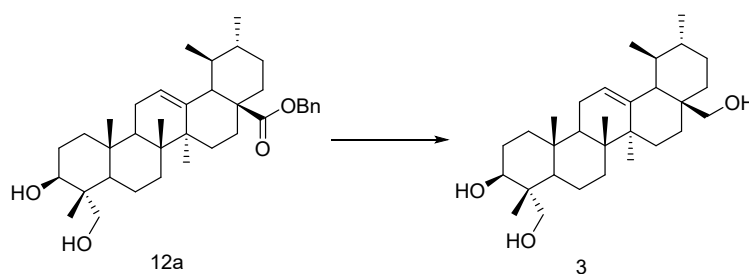

To a solution of **12a** (200 mg, 0.36 mmol) in dry THF (10 mL). LiAlH<sub>4</sub> (21 mg, 0.54 mmol) was added at 0°C. The reaction mixture was stirred at 65 °C for 1.5 h under N<sub>2</sub> atmosphere. At this point, the LiAlH<sub>4</sub> was quenched with MeOH and water was added, and then the mixture was extracted with EtOAc. The combined organic layers were washed with brine, dried over Na<sub>2</sub>SO<sub>4</sub>, filtered, and concentrated in vacuo. Purification by column chromatography on silica gel (DCM : MeOH = 30 : 1) afforded **3** (140 mg, 86% yield) as white solid. <sup>1</sup>H NMR (400 MHz, Pyridine-*d*<sub>5</sub>) δ 4.26 – 4.20 (m, 2H), 4.08 (q, *J* = 7.1 Hz, 1H), 3.94 (d, *J* = 10.6 Hz, 1H), 3.75 (d, *J* = 10.4 Hz, 1H), 3.50 (d, *J* = 10.6 Hz, 1H), 2.08 (td, *J* = 13.0, 12.6, 4.1 Hz, 1H), 2.03 – 1.98 (m, 2H), 1.97 – 1.92 (m, 3H), 1.76 – 1.70 (m, 3H), 1.69 – 1.61 (m, 3H), 1.57 – 1.51 (m, 3H), 1.46 – 1.36 (m, 2H), 1.34 – 1.25 (m, 2H), 1.19 (s, 3H), 1.10 (s, 3H), 1.06 (s, 3H), 1.03 (s, 3H), 0.98 – 0.95 (m, 6H). <sup>13</sup>C NMR (151 MHz, Pyridine-*d*<sub>5</sub>) δ 139.4, 124.8, 73.1, 68.9, 67.6, 54.4, 48.2, 47.9, 42.7, 42.2, 40.1, 39.6, 39.5, 38.8, 38.5, 36.8, 36.0, 32.7, 31.0, 27.5, 26.3, 23.6, 23.5, 23.4, 21.4, 18.3, 17.5, 16.8, 16.1, 12.9. HRMS (ESI-MS, *m/z*) [M + Na]<sup>+</sup> calc. for C<sub>30</sub>H<sub>49</sub>O<sub>3</sub>Na: 481.3658, found: 481.3655. The NMR spectrograms are almost same with that of reported isolated natural product <sup>2</sup>.

Table S2. Comparison of <sup>13</sup>C NMR data of isolated and herein prepared 3β,23,28-Trihydroxy-12-ursene [2].

| Carbon No. | Synthetic<br>$\delta_c$ (ppm) | Natural<br>$\delta_c$ (ppm) | Err (Natural- Synthetic)<br>$\Delta\delta_c$ (ppm) |
|------------|-------------------------------|-----------------------------|----------------------------------------------------|
| 1          | 39.4                          | 39.3                        | -0.1                                               |
| 2          | 28.1                          | 27.9                        | -0.2                                               |
| 3          | 73.7                          | 73.7                        | 0                                                  |
| 4          | 40.7                          | 40.6                        | -0.1                                               |
| 5          | 48.8                          | 48.7                        | -0.1                                               |
| 6          | 18.9                          | 18.8                        | -0.1                                               |
| 7          | 33.3                          | 33.2                        | -0.1                                               |
| 8          | 39.1                          | 38.9                        | -0.2                                               |
| 9          | 48.5                          | 48.4                        | -0.1                                               |
| 10         | 37.3                          | 37.2                        | -0.1                                               |
| 11         | 24.0                          | 23.9                        | -0.1                                               |
| 12         | 125.4                         | 125.3                       | -0.1                                               |
| 13         | 140.0                         | 140.0                       | 0                                                  |
| 14         | 42.7                          | 42.6                        | -0.1                                               |
| 15         | 26.9                          | 26.8                        | -0.1                                               |
| 16         | 24.2                          | 24.0                        | -0.2                                               |
| 17         | 43.3                          | 43.1                        | -0.2                                               |
| 18         | 55.0                          | 54.9                        | -0.1                                               |
| 19         | 40.1                          | 40.0                        | -0.1                                               |
| 20         | 40.2                          | 40.1                        | -0.1                                               |
| 21         | 31.6                          | 31.5                        | -0.1                                               |
| 22         | 36.6                          | 36.4                        | -0.2                                               |
| 23         | 68.2                          | 68.2                        | 0                                                  |
| 24         | 13.5                          | 13.4                        | -0.1                                               |
| 25         | 16.7                          | 16.0                        | -0.7                                               |
| 26         | 17.4                          | 17.3                        | -0.1                                               |
| 27         | 23.9                          | 23.8                        | -0.1                                               |
| 28         | 69.5                          | 69.4                        | -0.1                                               |
| 29         | 18.1                          | 18.0                        | -0.1                                               |
| 30         | 22.0                          | 21.8                        | -0.2                                               |

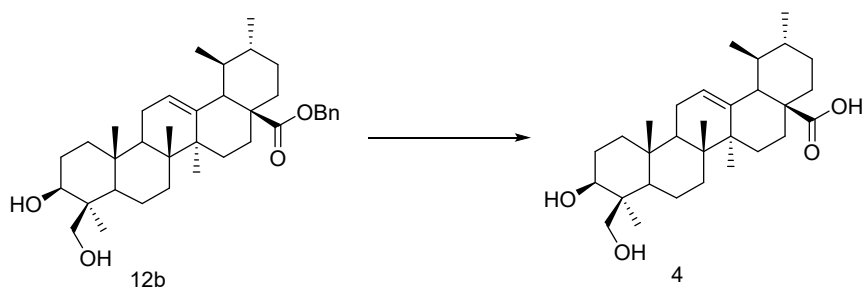

Following the procedure for preparation of **2**, hydrogenolysis of **12b** with Pd/C-H<sub>2</sub> gave **4** as a white solid (91% yield). <sup>1</sup>H NMR (600 MHz, Pyridine-*d*<sub>5</sub>) δ 5.50 (t, *J* = 3.7 Hz, 1H), 4.52 (s, 1H), 3.70 – 3.66 (m, 2H), 2.68 (d, *J* = 11.3 Hz, 1H), 2.41 – 2.33 (m, 1H), 2.13 (td, *J* = 13.1, 4.2 Hz, 1H), 2.05 – 2.01 (m, 2H), 1.98 (dt, *J* = 17.8, 3.6 Hz, 3H), 1.94 – 1.89 (m, 2H), 1.69 (s, 1H), 1.64 (dd, *J* = 11.2, 6.5 Hz, 1H), 1.60 (s, 2H), 1.58 (s, 3H), 1.49 (dt, *J* = 14.3, 4.2 Hz, 2H), 1.43 – 1.37 (m, 2H), 1.25 (s, 3H), 1.21 (dq, *J* = 13.6, 2.5 Hz, 1H), 1.03 (d, *J* = 5.8 Hz, 6H), 0.98 (d, *J* = 6.3 Hz, 4H), 0.89 (s, 3H). <sup>13</sup>C NMR (151 MHz, Pyridine-*d*<sub>5</sub>) δ 179.8, 139.2, 125.5, 80.1, 64.5, 56.3, 53.5, 48.0, 48.0, 43.1, 42.4, 39.9, 39.4, 39.3, 38.8, 37.4, 37.0, 33.8, 31.0, 28.6, 28.4, 24.8, 23.8, 23.8, 23.6, 21.4, 19.0, 17.5, 17.2, 16.1. HRMS (ESI-MS, *m/z*) [M + Na]<sup>+</sup> calc. for C<sub>30</sub>H<sub>47</sub>O<sub>4</sub>Na: 495.3450, found: 495.3449. The NMR spectrograms are almost same with that of reported isolated natural product<sup>3</sup>.

Table S3. Comparison of <sup>13</sup>C NMR data of isolated and herein prepared 3β, 24-dihydroxyurs-12-en-28-oic acid

| Carbon No. | Synthetic<br>δ <sub>c</sub> (ppm) | Natural<br>δ <sub>c</sub> (ppm) | Err (Natural- Synthetic)<br>Δδ <sub>c</sub> (ppm) |
|------------|-----------------------------------|---------------------------------|---------------------------------------------------|
| 1          | 38.8                              | 38.9                            | 0.1                                               |
| 2          | 28.6                              | 28.7                            | 0.1                                               |
| 3          | 80.1                              | 80.2                            | 0.1                                               |
| 4          | 43.1                              | 43.2                            | 0.1                                               |
| 5          | 56.3                              | 56.4                            | 0.1                                               |
| 6          | 19.0                              | 19.1                            | 0.1                                               |
| 7          | 33.8                              | 32.9                            | -0.9                                              |
| 8          | 39.9                              | 40.0                            | 0.1                                               |
| 9          | 48.0                              | 48.1                            | 0.1                                               |
| 10         | 36.9                              | 37.0                            | 0.1                                               |
| 11         | 23.8                              | 23.8                            | 0.1                                               |
| 12         | 125.4                             | 125.5                           | 0.1                                               |
| 13         | 139.1                             | 139.2                           | 0.1                                               |
| 14         | 42.3                              | 42.2                            | -0.1                                              |
| 15         | 28.3                              | 28.4                            | 0.1                                               |
| 16         | 24.8                              | 24.9                            | 0.1                                               |
| 17         | 48.0                              | 48.2                            | 0.2                                               |
| 18         | 53.4                              | 53.5                            | 0.1                                               |
| 19         | 39.3                              | 39.4                            | 0.1                                               |
| 20         | 39.4                              | 39.5                            | 0.1                                               |
| 21         | 31.0                              | 31.1                            | 0.1                                               |



|    |       |       |      |
|----|-------|-------|------|
| 22 | 37.3  | 37.4  | 0.1  |
| 23 | 23.6  | 22.9  | -0.7 |
| 24 | 64.5  | 64.5  | 0    |
| 25 | 16.0  | 16.1  | 0.1  |
| 26 | 17.2  | 17.3  | 0.1  |
| 27 | 23.6  | 23.6  | 0    |
| 28 | 179.8 | 179.9 | 0.1  |
| 29 | 17.5  | 17.5  | 0    |
| 30 | 21.3  | 21.4  | 0.1  |

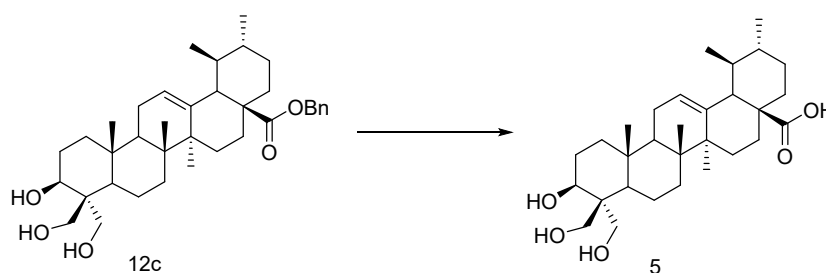

Following the procedure for preparation of **2**, hydrogenolysis of **12c** with Pd/C-H<sub>2</sub> gave **5** as a white solid (91% yield). <sup>1</sup>H NMR (600 MHz, MeOD-*d*<sub>4</sub>) δ 5.22 (t, *J* = 3.6 Hz, 1H), 4.12 (d, *J* = 11.5 Hz, 1H), 4.06 (d, *J* = 11.4 Hz, 1H), 3.75 (dd, *J* = 11.8, 4.6 Hz, 1H), 3.65 (d, *J* = 11.3 Hz, 1H), 3.54 (d, *J* = 11.6 Hz, 1H), 2.20 (dd, *J* = 11.4, 1.9 Hz, 1H), 2.04 (td, *J* = 13.5, 4.6 Hz, 1H), 1.92 (tdd, *J* = 18.6, 12.3, 5.6 Hz, 3H), 1.83 – 1.75 (m, 1H), 1.74 – 1.55 (m, 9H), 1.51 (dt, *J* = 13.3, 3.5 Hz, 1H), 1.12 (s, 3H), 1.08 (ddd, *J* = 13.8, 4.5, 2.6 Hz, 1H), 1.06 – 0.99 (m, 1H), 0.99 – 0.94 (m, 7H), 0.89 (t, *J* = 6.8 Hz, 4H), 0.83 (s, 3H). <sup>13</sup>C NMR (151 MHz, MeOD-*d*<sub>4</sub>) δ 181.6, 139.7, 126.7, 74.8, 63.7, 63.2, 54.3, 49.1, 48.9, 48.7, 47.2, 43.2, 40.7, 40.4, 40.4, 39.5, 38.1, 37.6, 34.2, 31.8, 29.2, 28.0, 25.3, 24.6, 24.1, 21.6, 19.7, 17.7, 17.7, 16.4. HRMS (ESI-MS, *m/z*) [M + Na]<sup>+</sup> calc. for C<sub>30</sub>H<sub>48</sub>O<sub>5</sub>Na: 511.3399, found: 511.3397. The NMR spectrograms are almost same with that of reported isolated natural product <sup>4</sup>.

Table S4. Comparison of <sup>13</sup>C NMR data of isolated and herein prepared 3β, 23, 24-trihydroxyurs-12-en-28-oic acid

| Carbon No. | Synthetic δ <sub>c</sub> (ppm) | Natural δ <sub>c</sub> (ppm) | Err (Natural- Synthetic) Δδ <sub>c</sub> (ppm) |
|------------|--------------------------------|------------------------------|------------------------------------------------|
| 1          | 39.5                           | 39.5                         | 0                                              |
| 2          | 28.0                           | 28.0                         | 0                                              |
| 3          | 74.8                           | 74.8                         | 0                                              |
| 4          | 47.2                           | 47.2                         | 0                                              |
| 5          | 49.1                           | 49.0                         | 0.1                                            |
| 6          | 19.7                           | 19.7                         | 0                                              |
| 7          | 34.1                           | 34.2                         | 0.1                                            |

|    |       |       |      |
|----|-------|-------|------|
| 8  | 40.7  | 40.8  | 0.1  |
| 9  | 48.7  | 48.8  | 0.1  |
| 10 | 37.6  | 37.6  | 0    |
| 11 | 24.6  | 25.0  | 0.4  |
| 12 | 126.7 | 126.7 | 0    |
| 13 | 139.7 | 139.8 | 0.1  |
| 14 | 43.3  | 43.3  | 0    |
| 15 | 29.2  | 29.2  | 0    |
| 16 | 25.3  | 25.4  | 0.1  |
| 17 | 48.9  | 48.9  | 0    |
| 18 | 54.3  | 54.3  | 0    |
| 19 | 40.4  | 40.4  | 0    |
| 20 | 40.4  | 40.2  | -0.2 |
| 21 | 31.8  | 31.6  | -0.2 |
| 22 | 38.1  | 38.2  | 0.1  |
| 23 | 63.2  | 63.4  | 0.2  |
| 24 | 63.7  | 63.7  | 0    |
| 25 | 16.4  | 16.4  | 0    |
| 26 | 17.7  | 17.7  | 0    |
| 27 | 24.1  | 24.1  | 0    |
| 28 | 181.6 | 182.0 | 0.4  |
| 29 | 17.7  | 17.6  | -0.1 |
| 30 | 21.6  | 21.6  | 0    |

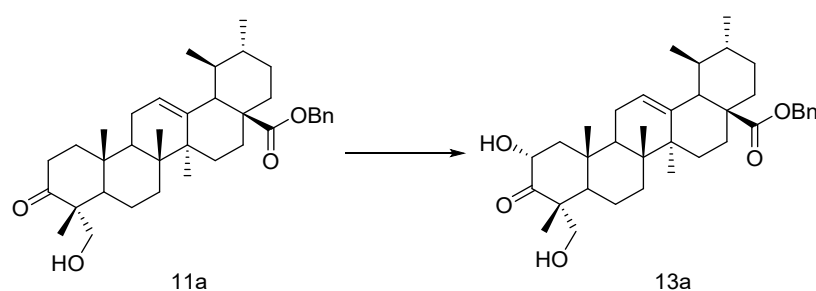

Compound **11a** (1.0 g, 1.8 mmol) was dissolved in MeOH-DCM (30 mL, V / V = 1 : 1), m-CPBA (620 mg, 2.7 mmol) and concentrated H<sub>2</sub>SO<sub>4</sub> (cat.) was added at 0 °C. Then, the reaction mixture was stirred for 12 h at room temperature in darkness. Excess NaHSO<sub>3</sub> was added to the reaction mixture and stirred for 0.5 h. After most organic solvents were removed by evaporation in vacuo, the residue was extracted with DCM (3 x 50 mL), the organic layer was washed with H<sub>2</sub>O and brine, dried over Na<sub>2</sub>SO<sub>4</sub>, and concentrated in vacuo. Purification by column chromatography on silica gel (petroleum : EtOAc = 5 : 1) afforded **13a** (0.78 g, 76%) as white solid. <sup>1</sup>H NMR (400 MHz, DMSO-*d*<sub>6</sub>) δ 7.46 – 7.27 (m, 5H), 5.17 (s, 1H), 5.05 (d, *J* = 12.5 Hz, 1H), 4.96 (dd, *J* = 12.5, 7.0 Hz, 1H), 4.73 (d, *J* = 4.6 Hz, 1H), 4.48 (t, *J* = 5.4 Hz, 1H), 4.35 – 4.26 (m, 1H), 3.69 (dd, *J* = 10.8, 5.2 Hz, 1H), 3.09 (dd, *J* = 10.8, 5.5 Hz, 1H), 2.19 (d, *J* = 11.2 Hz, 1H), 2.11 (dd, *J* = 12.4, 6.5 Hz, 1H), 2.02 (dd, *J* = 13.7, 9.3 Hz, 2H), 1.94 – 1.88 (m, 1H),

1.74 (d,  $J = 9.4$  Hz, 2H), 1.64 – 1.57 (m, 2H), 1.55 (d,  $J = 12.2$  Hz, 2H), 1.52 – 1.41 (m, 3H), 1.37 (d,  $J = 13.2$  Hz, 2H), 1.32 (d,  $J = 7.9$  Hz, 2H), 1.26 – 1.20 (m, 2H), 1.15 (s, 3H), 1.04 (s, 3H), 0.92 (s, 3H), 0.82 (s,  $J = 6.4$  Hz, 3H), 0.81 (s,  $J = 7.1$  Hz, 3H), 0.61 (s, 3H).  $^{13}\text{C}$  NMR (151 MHz,  $\text{DMSO-}d_6$ )  $\delta$  213.8, 176.1, 138.0, 136.2, 128.4, 127.9, 124.9, 68.6, 65.3, 63.4, 52.5, 51.9, 47.6, 47.4, 47.3, 46.4, 41.7, 40.1, 38.4, 38.3, 36.5, 36.2, 31.9, 30.0, 27.3, 23.8, 23.3, 23.0, 21.0, 18.1, 17.4, 17.0, 16.9, 16.0. HRMS (ESI-MS,  $m/z$ )  $[\text{M} + \text{Na}]^+$  calc. for  $\text{C}_{37}\text{H}_{51}\text{O}_5\text{Na}$ : 599.3712, found: 599.3713.

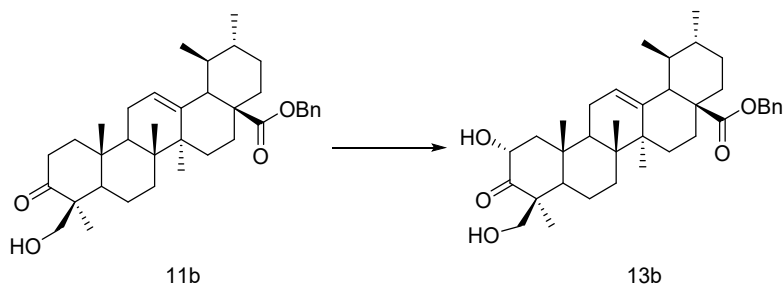

Following the procedure for preparation of **13a**, hydroxylation of **11b** with *m*-CPBA gave **13b** as a white solid (66% yield).  $^1\text{H}$  NMR (400 MHz,  $\text{DMSO-}d_6$ )  $\delta$  7.43 – 7.29 (m, 5H), 5.14 (d,  $J = 3.8$  Hz, 1H), 5.04 (d,  $J = 12.6$  Hz, 1H), 4.96 (d,  $J = 12.6$  Hz, 1H), 4.58 (t,  $J = 6.4$  Hz, 2H), 4.47 (dt,  $J = 12.0, 5.7$  Hz, 1H), 3.90 (dd,  $J = 11.2, 4.5$  Hz, 1H), 3.30 (s, 1H), 2.22 – 2.09 (m, 2H), 1.99 (dt,  $J = 13.2, 6.7$  Hz, 1H), 1.87 (q,  $J = 4.2, 3.7$  Hz, 2H), 1.71 (dt,  $J = 17.0, 8.7$  Hz, 1H), 1.58 (t,  $J = 8.4$  Hz, 2H), 1.54 – 1.37 (m, 6H), 1.35 – 1.27 (m, 2H), 1.26 – 1.20 (m, 2H), 1.17 (s, 3H), 1.06 (s, 3H), 1.01 (s, 3H), 0.91 (s, 3H), 0.80 (d,  $J = 6.4$  Hz, 3H), 0.56 (s, 3H).  $^{13}\text{C}$  NMR (151 MHz,  $\text{DMSO-}d_6$ )  $\delta$  214.0, 176.5, 138.3, 136.7, 131.1, 129.3, 128.3, 125.1, 69.5, 65.8, 64.5, 58.1, 55.1, 52.9, 50.5, 47.8, 47.2, 42.0, 40.5, 38.8, 38.7, 37.6, 36.6, 33.2, 30.4, 27.8, 24.2, 23.7, 21.4, 20.1, 19.6, 17.4, 17.1, 17.0. HRMS (ESI-MS,  $m/z$ )  $[\text{M} + \text{Na}]^+$  calc. for  $\text{C}_{37}\text{H}_{51}\text{O}_5\text{Na}$ : 599.3712, found: 599.3713.

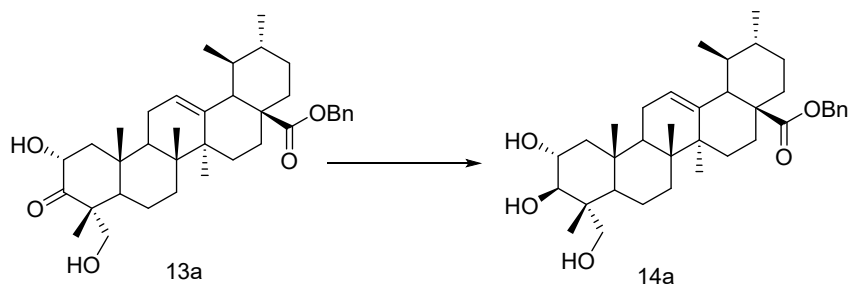

Following the procedure for preparation of **11a**, reduction of **13a** with  $\text{NaBH}_4$  gave **14a** as a white solid (88% yield).  $^1\text{H}$  NMR (400 MHz,  $\text{DMSO-}d_6$ )  $\delta$  7.40 (h,  $J = 7.4$  Hz, 5H), 5.22 (d,  $J = 3.6$  Hz, 1H), 5.10 (d,  $J = 12.5$  Hz, 1H), 5.01 (d,  $J = 12.5$  Hz, 1H), 4.47 (s, 1H), 4.28 (s, 1H), 4.24 (s, 1H), 3.54 (q,  $J = 7.6, 5.2$  Hz, 1H), 3.36 (d,  $J = 10.4$  Hz, 1H), 3.23 (d,  $J = 9.4$  Hz, 1H), 3.09 (d,  $J = 10.5$  Hz, 1H), 2.24 (d,  $J = 11.2$  Hz,

1H), 2.06 (dt,  $J = 13.1, 6.8$  Hz, 1H), 1.84 (d,  $J = 8.6$  Hz, 4H), 1.70 – 1.61 (m, 2H), 1.54 (m, 4H), 1.47 – 1.28 (m, 4H), 1.23 (q,  $J = 13.0, 11.0$  Hz, 3H), 1.11 (s, 3H), 1.05 (d,  $J = 14.1$  Hz, 2H), 0.98 (s, 3H), 0.96 (s, 3H), 0.88 (d,  $J = 6.4$  Hz, 3H), 0.79 (t,  $J = 12.0$  Hz, 1H), 0.61 (s, 3H), 0.59 (s, 3H).  $^{13}\text{C}$  NMR (151 MHz,  $\text{CDCl}_3$ )  $\delta$  177.4, 138.3, 136.5, 128.6, 128.3, 128.1, 125.5, 80.5, 70.5, 68.9, 66.1, 53.0, 49.1, 48.2, 47.6, 46.4, 42.2, 39.6, 39.2, 39.0, 38.3, 36.7, 32.8, 30.8, 28.0, 24.3, 23.8, 23.4, 21.3, 18.4, 17.3, 17.2, 13.0. HRMS (ESI-MS,  $m/z$ )  $[\text{M} + \text{Na}]^+$  calc. for  $\text{C}_{37}\text{H}_{54}\text{O}_5\text{Na}$ : 601.3869, found: 601.3871.

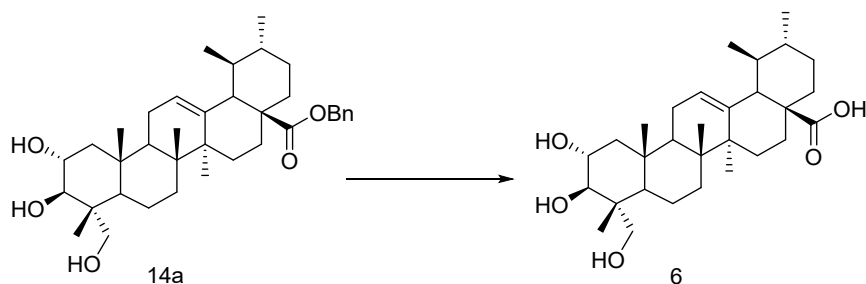

Compound **14a** (0.40 g, 0.68 mmol) was dissolved in THF (10 mL). 10% Pd/C (40 mg) was added. The reaction mixture was stirred overnight at room temperature under  $\text{H}_2$  at atmospheric pressure. The reaction mixture was filtered through Celite and washed with THF; the organic layer was concentrated in vacuo. Purification by column chromatography on silica gel ( $\text{CH}_2\text{Cl}_2 : \text{MeOH} = 15 : 1$ ) afforded **6** (324 mg, 96% yield) as white solid.  $^1\text{H}$  NMR (600 MHz,  $\text{DMSO}-d_6$ )  $\delta$  11.88 (s, 1H), 5.14 (t,  $J = 3.4$  Hz, 1H), 4.39 (s, 1H), 4.21 (d,  $J = 11.4$  Hz, 1H), 4.15 (s, 1H), 3.48 (t,  $J = 7.8$  Hz, 1H), 3.29 (d,  $J = 4.2$  Hz, 1H), 3.17 (d,  $J = 9.4$  Hz, 1H), 3.03 (dd,  $J = 10.4, 3.6$  Hz, 1H), 2.11 (d,  $J = 11.3$  Hz, 1H), 1.93 (td,  $J = 13.3, 4.1$  Hz, 1H), 1.89 – 1.84 (m, 2H), 1.82 – 1.74 (m, 2H), 1.57 (dd,  $J = 9.7, 3.2$  Hz, 1H), 1.54 – 1.51 (m, 2H), 1.49 (d,  $J = 7.8$  Hz, 2H), 1.44 – 1.37 (m, 2H), 1.32 – 1.26 (m, 2H), 1.25 – 1.22 (m, 2H), 1.19 (d,  $J = 11.5$  Hz, 2H), 1.04 (s, 3H), 0.93 (s, 3H), 0.91 (s, 3H), 0.82 (s,  $J = 6.4$  Hz, 3H), 0.74 (s,  $J = 4.6$  Hz, 3H), 0.54 (s, 3H).  $^{13}\text{C}$  NMR (151 MHz, Pyridine- $d_5$ )  $\delta$  179.9, 139.1, 125.3, 77.9, 68.6, 66.2, 53.3, 47.8, 47.8, 47.7, 47.6, 43.4, 42.3, 39.8, 39.2, 39.2, 38.1, 37.2, 32.9, 30.9, 28.4, 24.7, 23.7, 23.5, 21.2, 18.3, 17.3, 17.3, 17.3, 14.2. HRMS (ESI-MS,  $m/z$ )  $[\text{M} + \text{Na}]^+$  calc. for  $\text{C}_{30}\text{H}_{48}\text{O}_5\text{Na}$ : 511.3399, found: 511.3398. The NMR spectrograms are almost same with that of reported isolated natural product <sup>5</sup>.

Table S5. Comparison of  $^{13}\text{C}$  NMR data of isolated and herein prepared asiatic acid

| Carbon No. | Synthetic $\delta_c$ (ppm) | Natural $\delta_c$ (ppm) | Err (Natural- Synthetic) $\Delta\delta_c$ (ppm) |
|------------|----------------------------|--------------------------|-------------------------------------------------|
| 1          | 47.8                       | 47.8                     | 0                                               |
| 2          | 66.3                       | 66.5                     | 0.2                                             |

|    |       |       |     |
|----|-------|-------|-----|
| 3  | 78.1  | 78.2  | 0.1 |
| 4  | 43.6  | 43.6  | 0   |
| 5  | 48.0  | 48.0  | 0   |
| 6  | 18.4  | 18.5  | 0.1 |
| 7  | 33.1  | 33.1  | 0   |
| 8  | 39.9  | 40.0  | 0.1 |
| 9  | 47.8  | 47.8  | 0   |
| 10 | 38.2  | 38.3  | 0.1 |
| 11 | 23.8  | 23.8  | 0   |
| 12 | 125.5 | 125.5 | 0   |
| 13 | 139.2 | 139.3 | 0.1 |
| 14 | 42.5  | 42.5  | 0   |
| 15 | 28.6  | 28.6  | 0   |
| 16 | 24.8  | 24.8  | 0   |
| 17 | 47.9  | 48.0  | 0.1 |
| 18 | 53.4  | 53.5  | 0.1 |
| 19 | 39.4  | 39.4  | 0   |
| 20 | 39.3  | 39.3  | 0   |
| 21 | 31.0  | 31.0  | 0   |
| 22 | 37.4  | 37.4  | 0   |
| 23 | 68.8  | 68.9  | 0.1 |
| 24 | 14.3  | 14.3  | 0   |
| 25 | 17.5  | 17.5  | 0   |
| 26 | 17.4  | 17.4  | 0   |
| 27 | 23.7  | 23.7  | 0   |
| 28 | 179.9 | 179.9 | 0   |
| 29 | 17.4  | 17.4  | 0   |
| 30 | 21.3  | 21.3  | 0   |

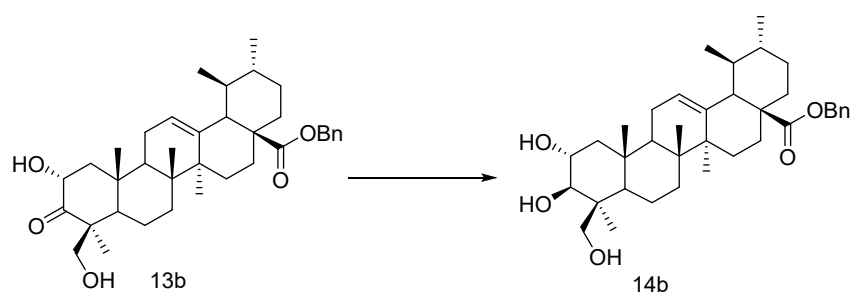

Following the procedure for preparation of **11a**, reduction of **13b** with  $\text{NaBH}_4$  gave **14b** as a white solid (85% yield), which was used directly in the next step without further purification.

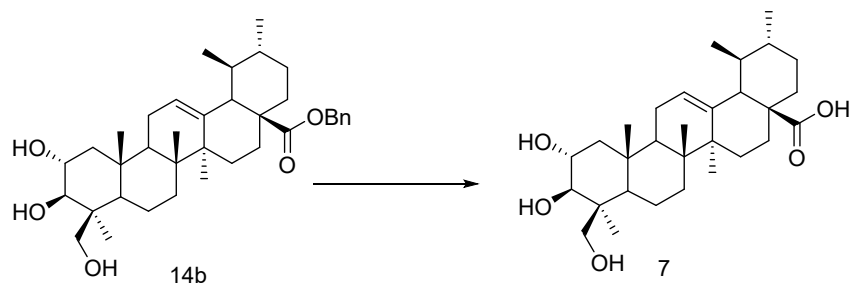

Following the procedure for preparation of **6**, hydrogenolysis of **14b** with Pd/C-H<sub>2</sub> gave **7** as a white solid (99% yield). <sup>1</sup>H NMR (600 MHz, Pyridine-*d*<sub>5</sub>) δ 5.47 (t, *J* = 3.6 Hz, 1H), 4.47 (d, *J* = 10.9 Hz, 1H), 4.32 (ddd, *J* = 11.2, 9.4, 4.4 Hz, 1H), 3.73 (d, *J* = 11.0 Hz, 1H), 3.59 (d, *J* = 9.4 Hz, 1H), 2.64 (d, *J* = 13.0 Hz, 1H), 2.32 (td, *J* = 13.6, 5.0 Hz, 1H), 2.27 (dd, *J* = 12.6, 4.4 Hz, 1H), 2.13 (td, *J* = 13.3, 4.5 Hz, 1H), 2.09 – 1.91 (m, 5H), 1.76 (dd, *J* = 11.3, 6.3 Hz, 1H), 1.71 (dd, *J* = 10.2, 6.5 Hz, 1H), 1.61 (s, 3H), 1.59 – 1.53 (m, 1H), 1.53 – 1.45 (m, 3H), 1.45 – 1.34 (m, 3H), 1.30 (td, *J* = 13.3, 3.8 Hz, 4H), 1.22 (s, 3H), 1.20 – 1.14 (m, 2H), 1.04 (s, 1H), 1.03 (s, 3H), 1.00 (d, *J* = 6.2 Hz, 6H), 0.96 (d, *J* = 6.3 Hz, 3H). <sup>13</sup>C NMR (151 MHz, Pyridine-*d*<sub>5</sub>) δ 179.8, 139.2, 125.4, 85.6, 68.6, 65.6, 56.4, 53.4, 48.1, 47.9, 47.9, 43.9, 42.4, 39.9, 39.4, 39.3, 38.2, 37.4, 33.8, 31.0, 28.5, 24.8, 24.1, 23.9, 23.8, 21.3, 19.2, 17.4, 17.3, 17.2. HRMS (ESI-MS, *m/z*) [M + Na]<sup>+</sup> calc. for C<sub>30</sub>H<sub>47</sub>O<sub>5</sub>Na: 511.3399, found: 511.3400. The NMR spectrograms are almost same with that of reported isolated natural product <sup>5</sup>.

Table S6. Comparison of <sup>13</sup>C NMR data of isolated and herein prepared 2α, 3β, 24-trihydroxyurs-12-en-28-oic acid

| Carbon No. | Synthetic<br>δ <sub>c</sub> (ppm) | Natural<br>δ <sub>c</sub> (ppm) | Err (Natural- Synthetic)<br>Δδ <sub>c</sub> (ppm) |
|------------|-----------------------------------|---------------------------------|---------------------------------------------------|
| 1          | 47.8                              | 47.9                            | 0.1                                               |
| 2          | 68.6                              | 68.7                            | 0.1                                               |
| 3          | 85.6                              | 85.8                            | 0.2                                               |
| 4          | 43.9                              | 44.0                            | 0.1                                               |
| 5          | 56.4                              | 56.5                            | 0.1                                               |
| 6          | 19.2                              | 19.3                            | 0.1                                               |
| 7          | 33.8                              | 33.9                            | 0.1                                               |
| 8          | 39.9                              | 40.1                            | 0.2                                               |
| 9          | 48.1                              | 48.2                            | 0.1                                               |
| 10         | 38.2                              | 38.3                            | 0.1                                               |
| 11         | 23.9                              | 24.0                            | 0.1                                               |
| 12         | 125.4                             | 125.5                           | 0.1                                               |
| 13         | 139.2                             | 139.3                           | 0.1                                               |
| 14         | 42.4                              | 42.5                            | 0.1                                               |

|    |       |       |     |
|----|-------|-------|-----|
| 15 | 28.5  | 28.7  | 0.2 |
| 16 | 24.8  | 24.9  | 0.1 |
| 17 | 47.9  | 48.1  | 0.2 |
| 18 | 53.4  | 53.6  | 0.2 |
| 19 | 39.3  | 39.4  | 0.1 |
| 20 | 39.4  | 39.5  | 0.1 |
| 21 | 31.0  | 31.1  | 0.1 |
| 22 | 37.4  | 37.4  | 0   |
| 23 | 24.1  | 24.2  | 0.1 |
| 24 | 65.6  | 65.7  | 0.1 |
| 25 | 17.4  | 17.5  | 0.1 |
| 26 | 17.3  | 17.4  | 0.1 |
| 27 | 23.8  | 23.9  | 0.1 |
| 28 | 179.8 | 179.9 | 0.1 |
| 29 | 17.2  | 17.4  | 0.2 |
| 30 | 21.3  | 21.4  | 0.1 |

## $^1\text{H}$ and $^{13}\text{C}$ NMR spectra

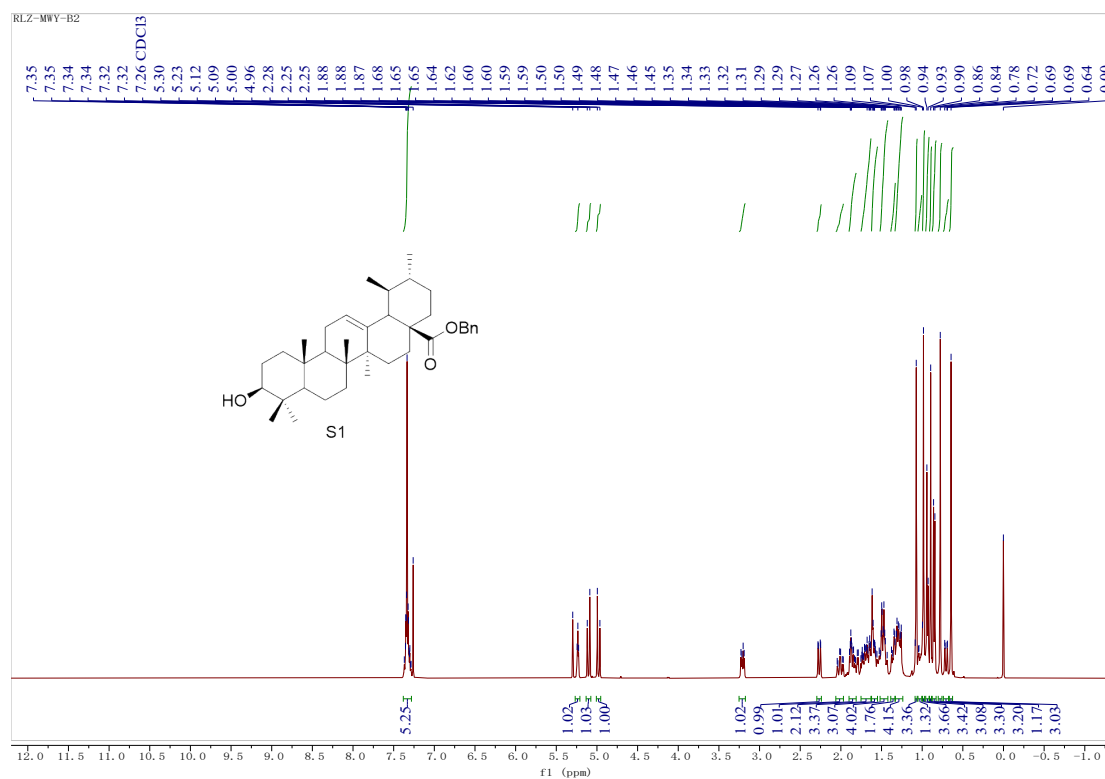

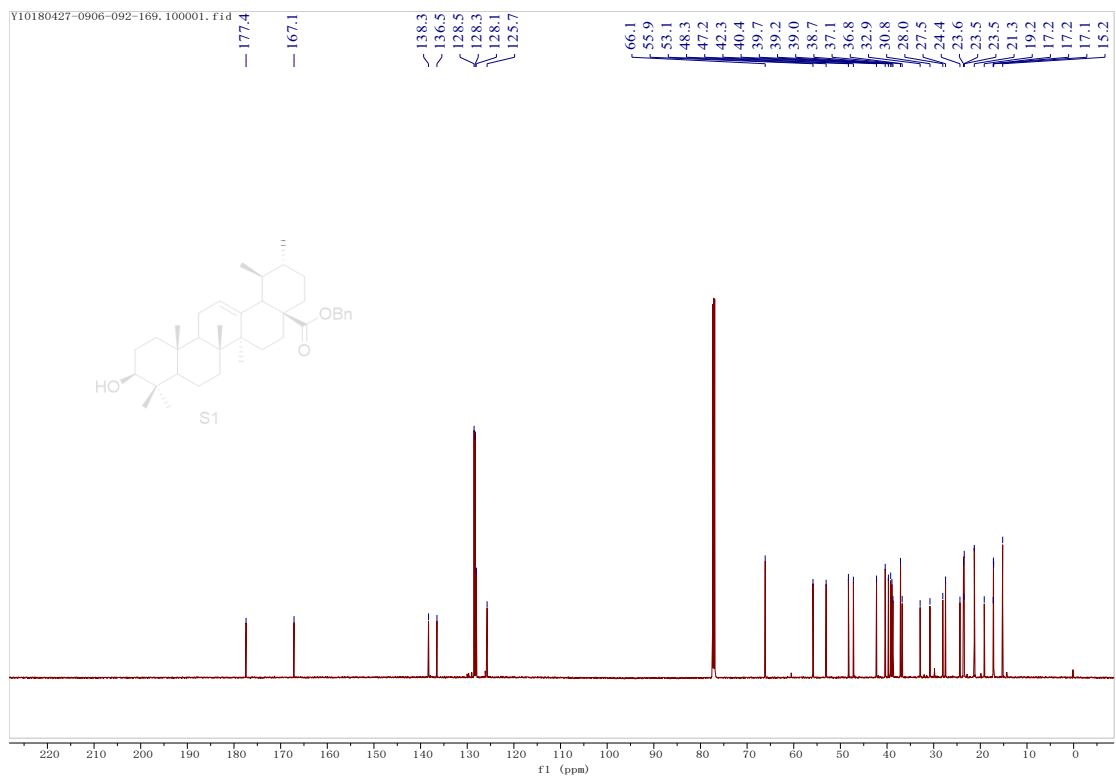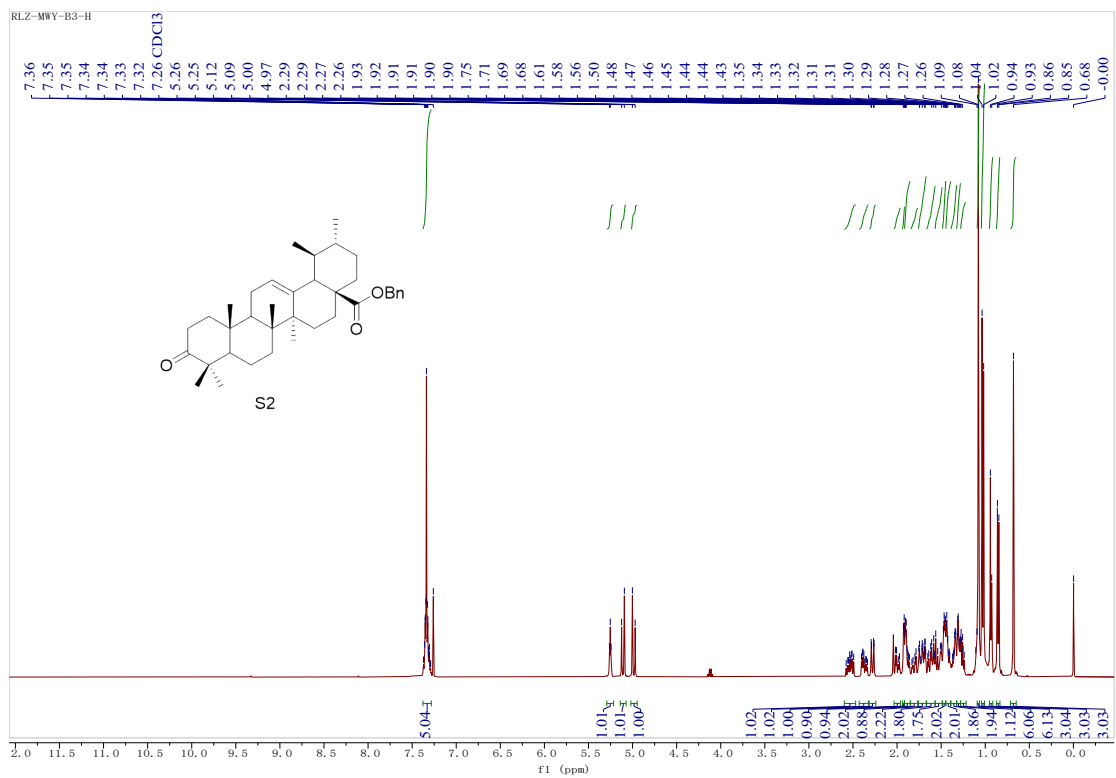



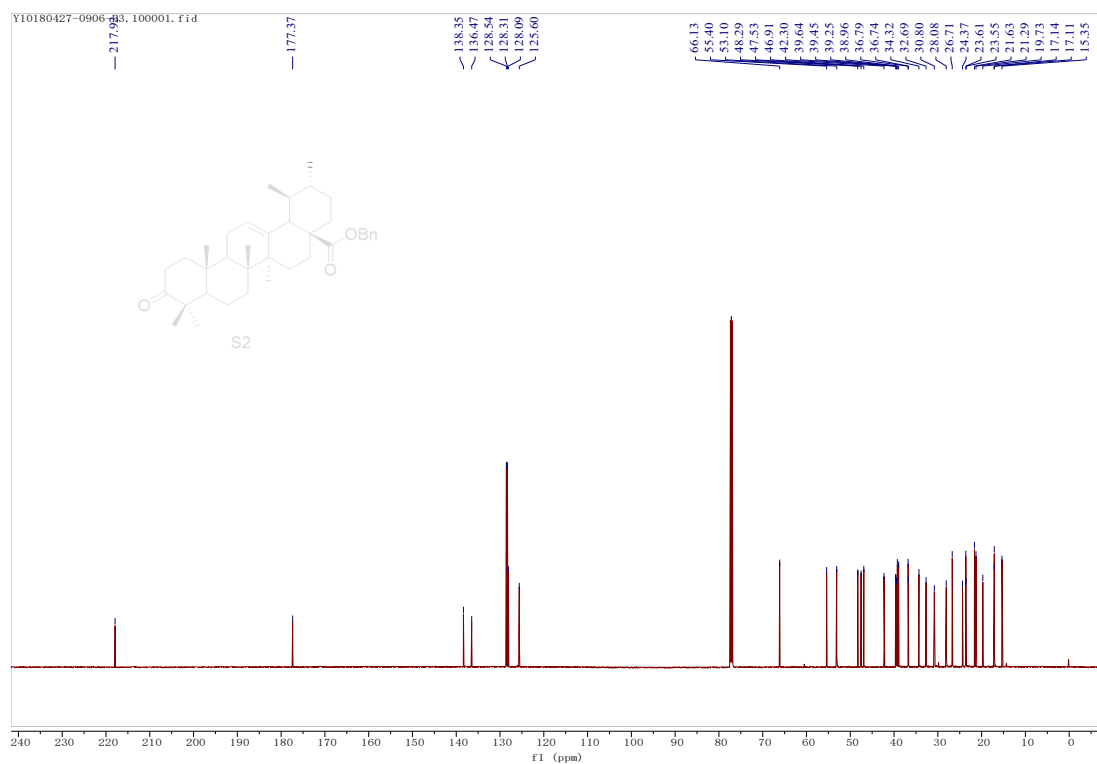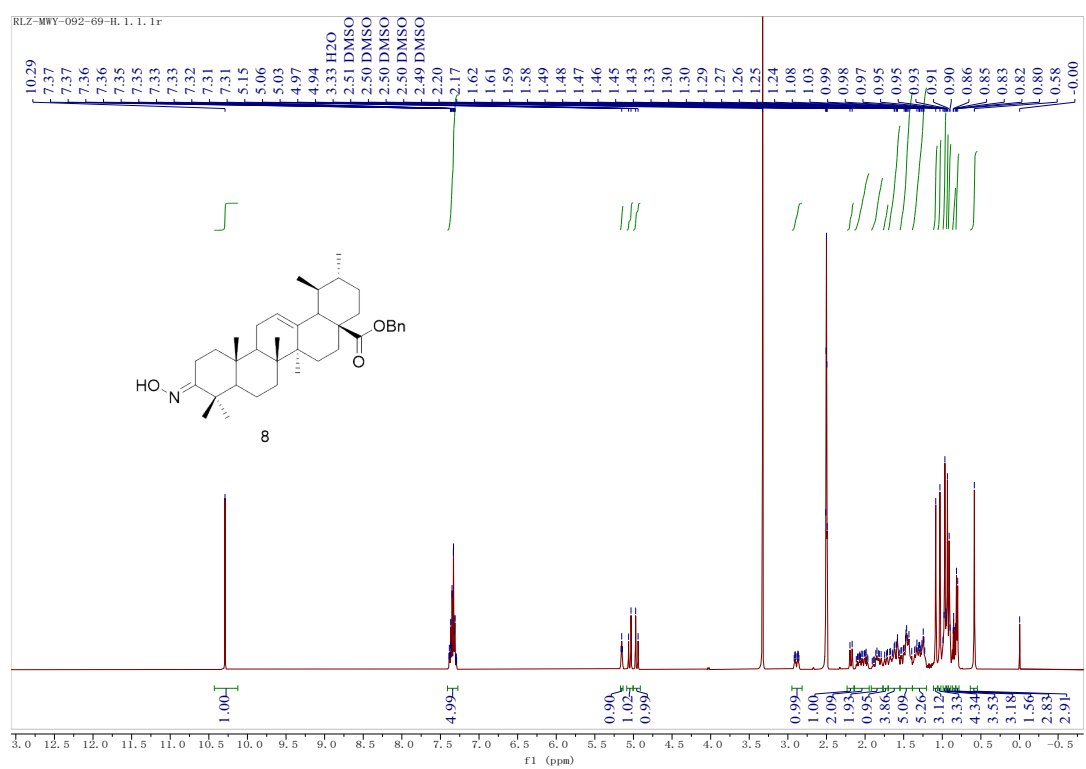

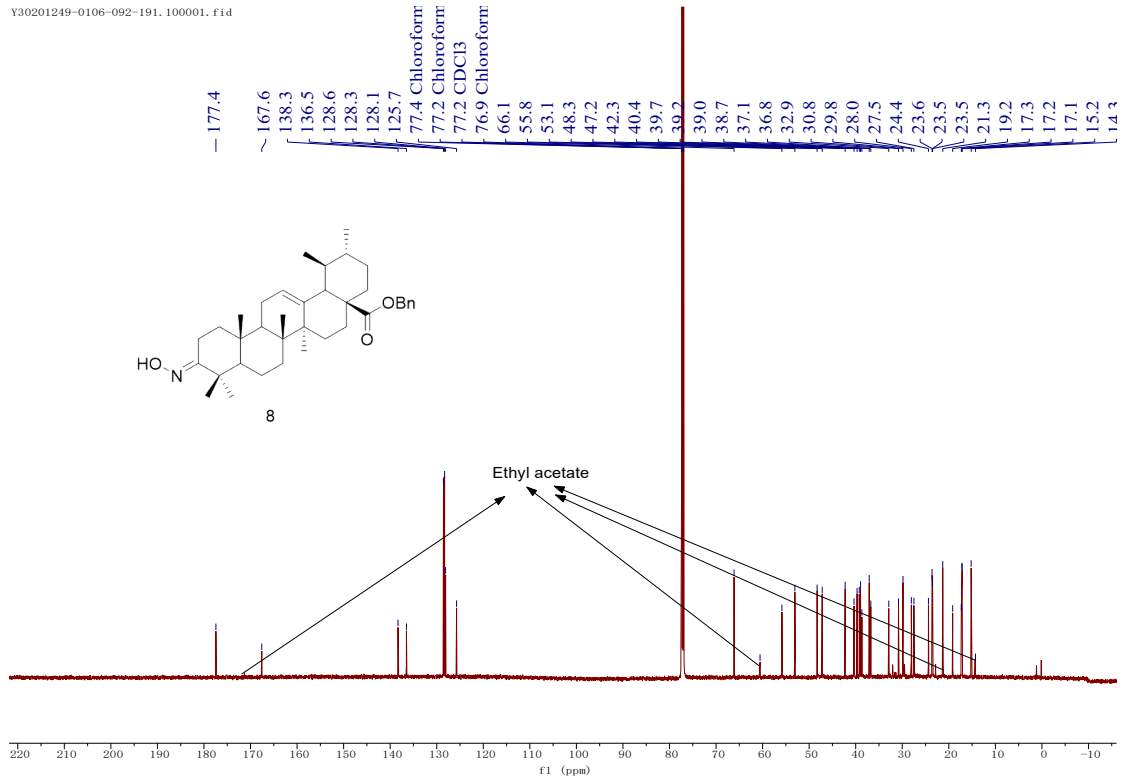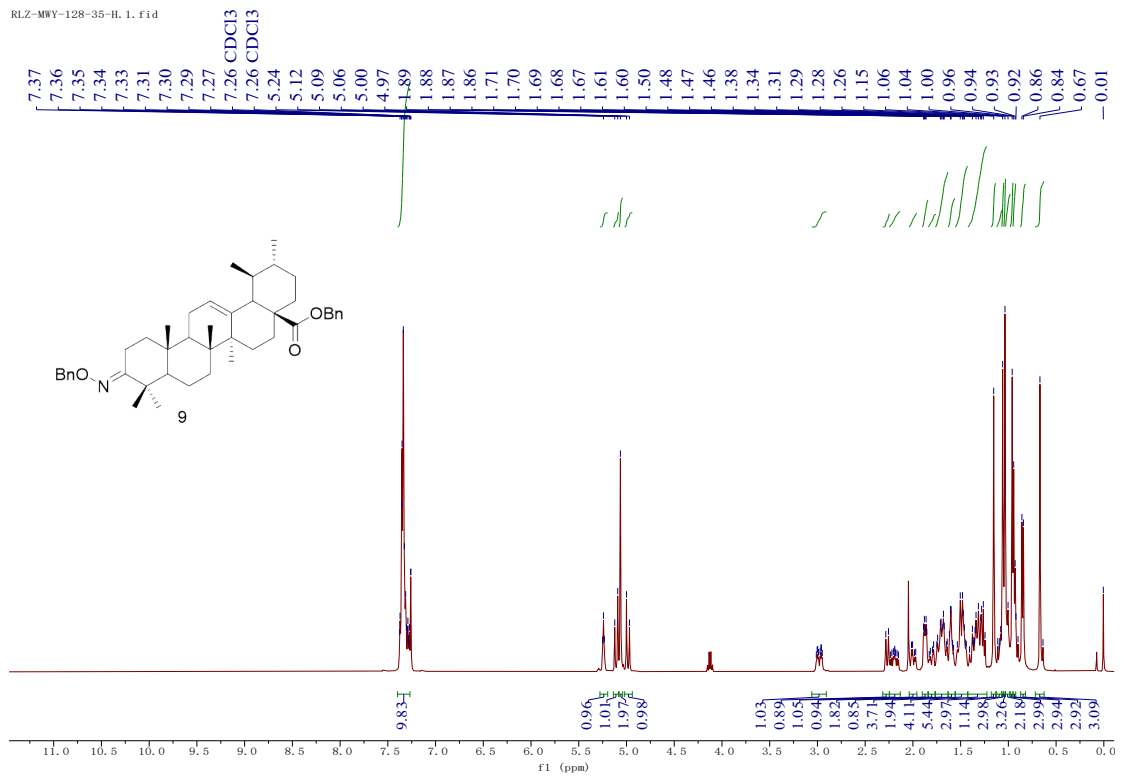

Y10180427-1025-128-35, 100001, f1.d

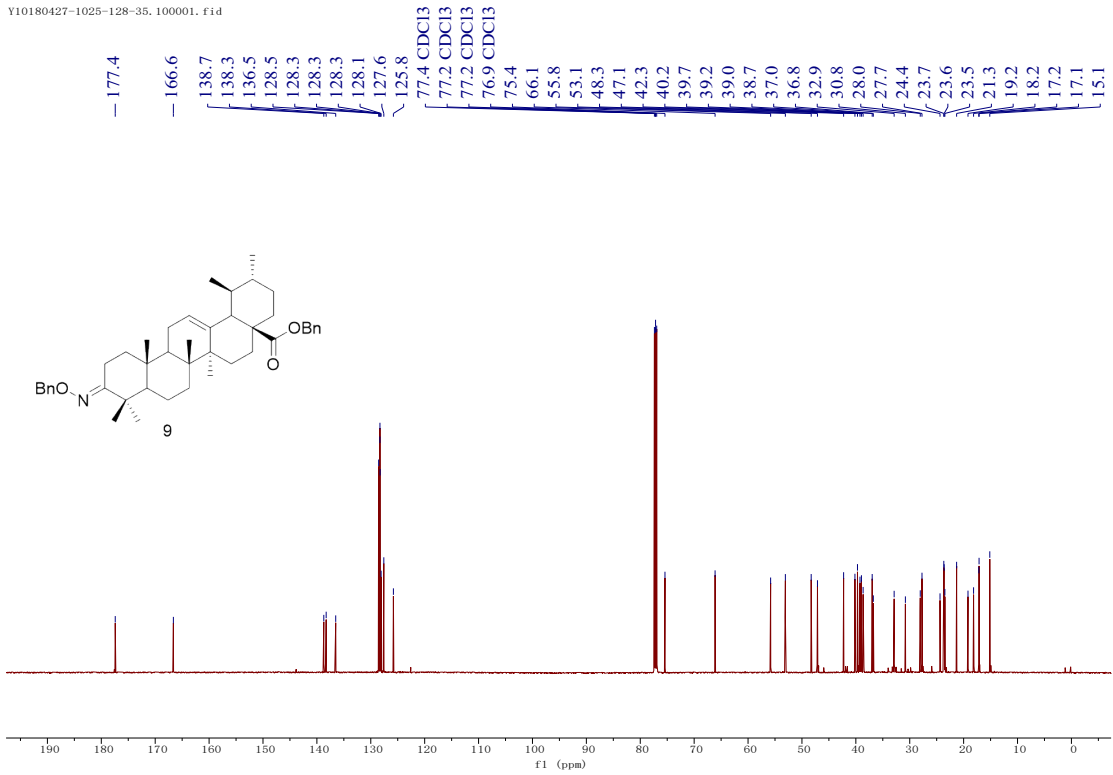

Y10180427-0825-090-5, 1, f1.d

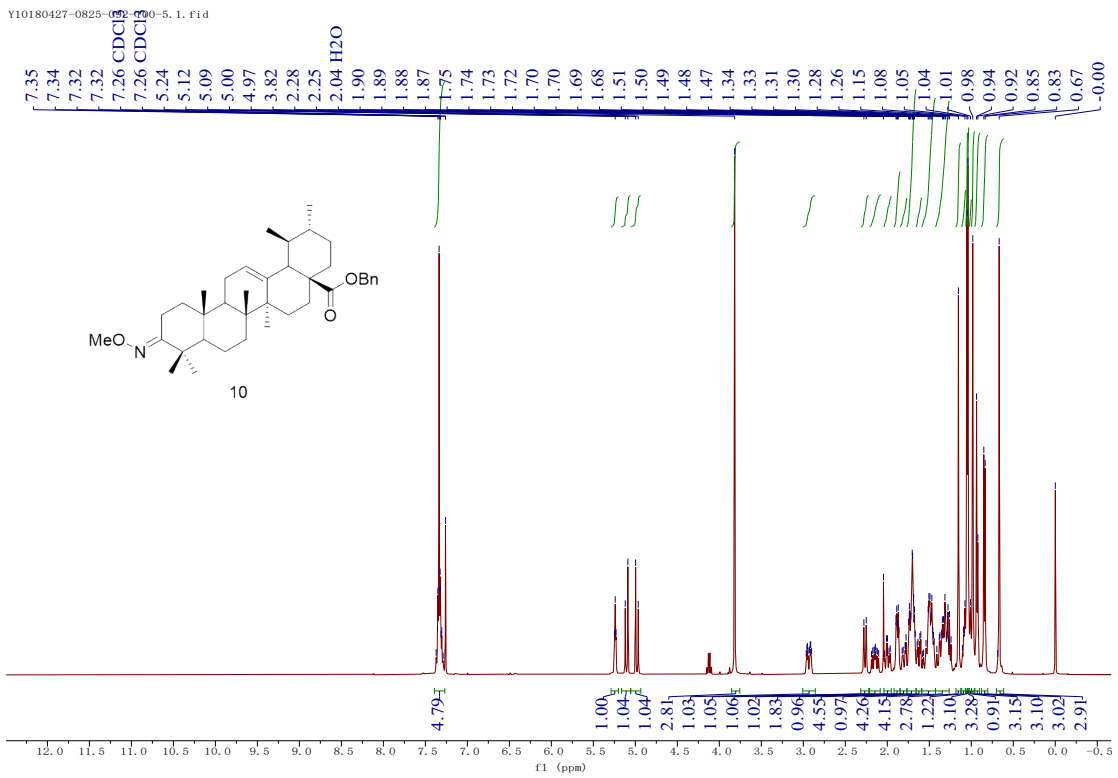

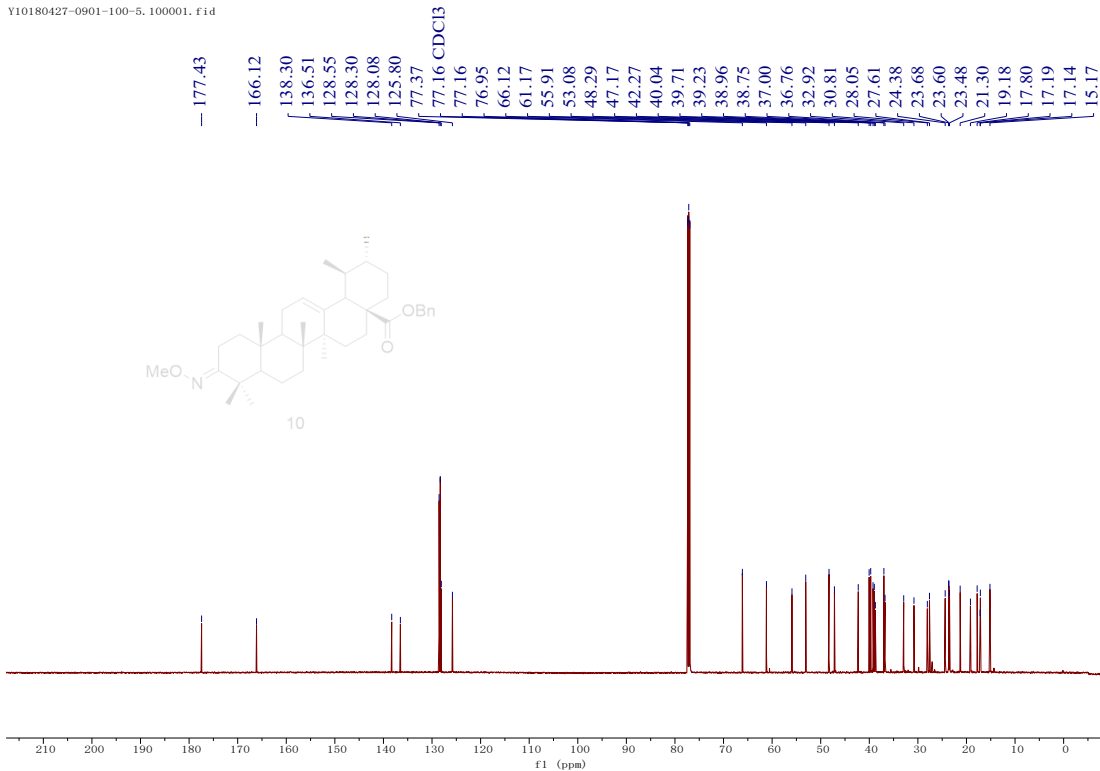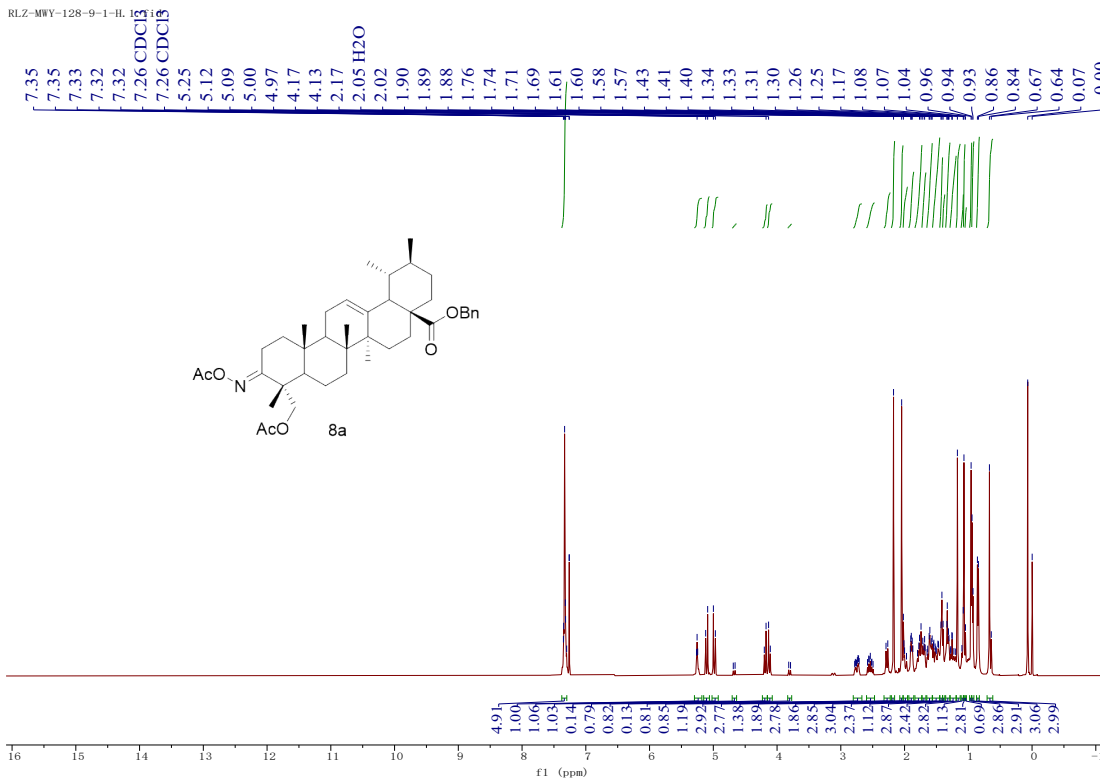

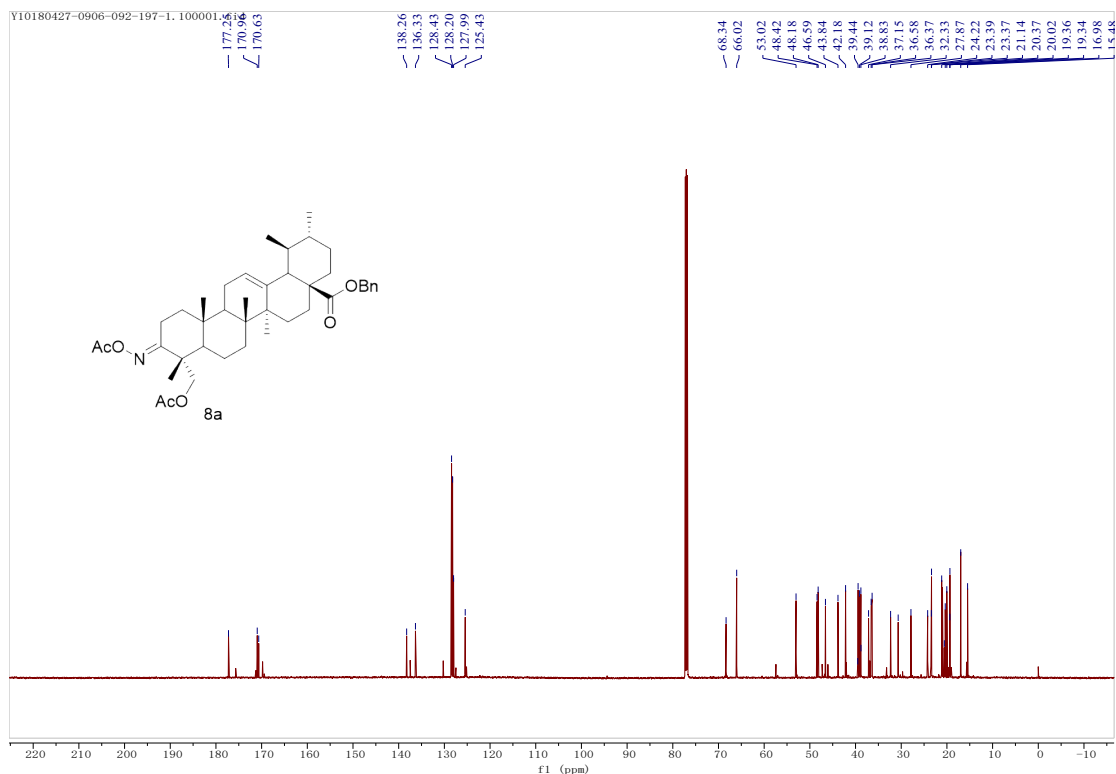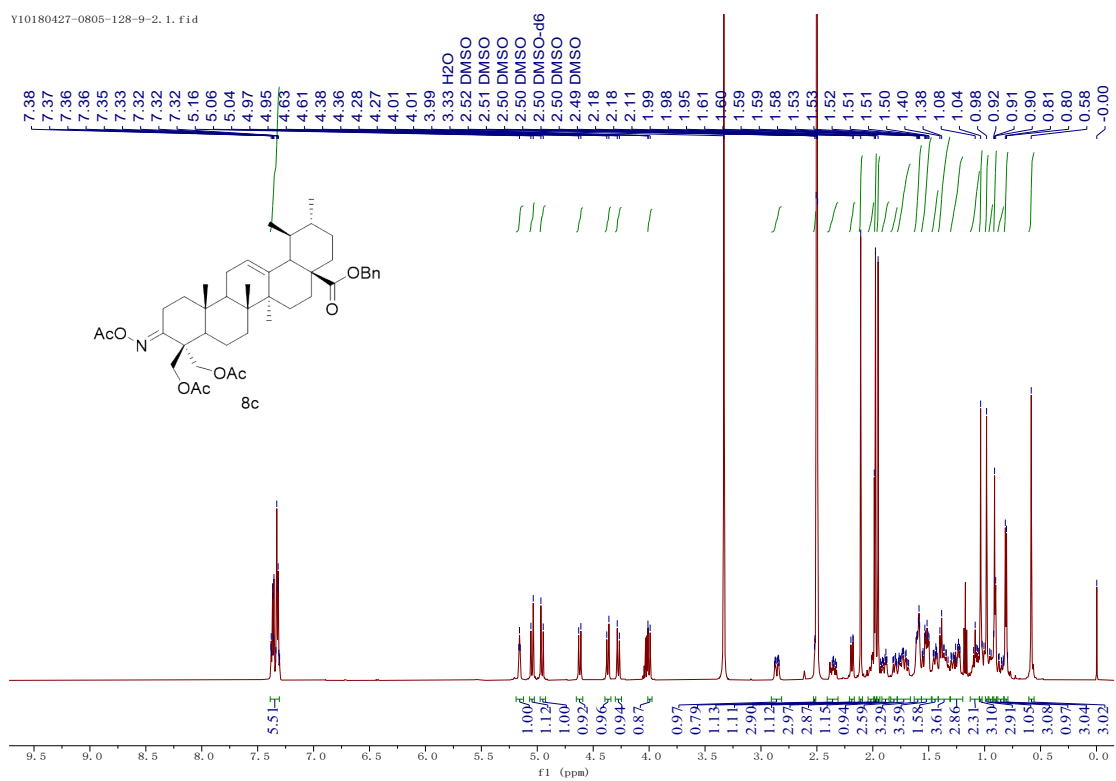

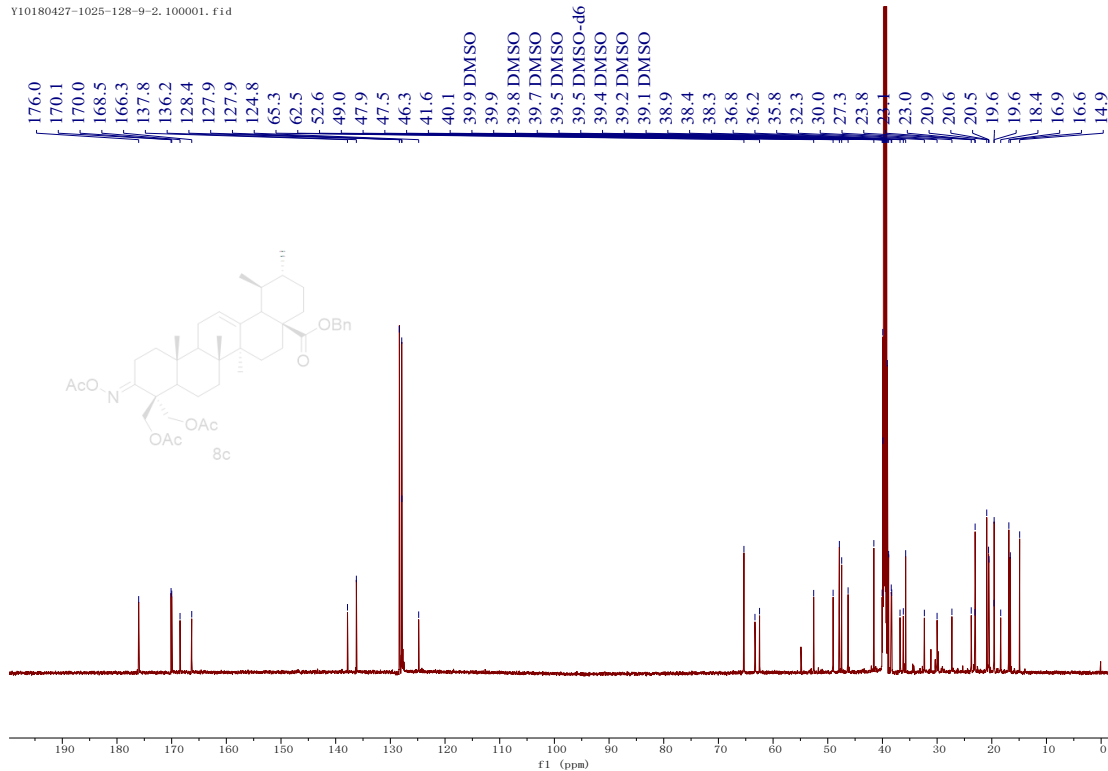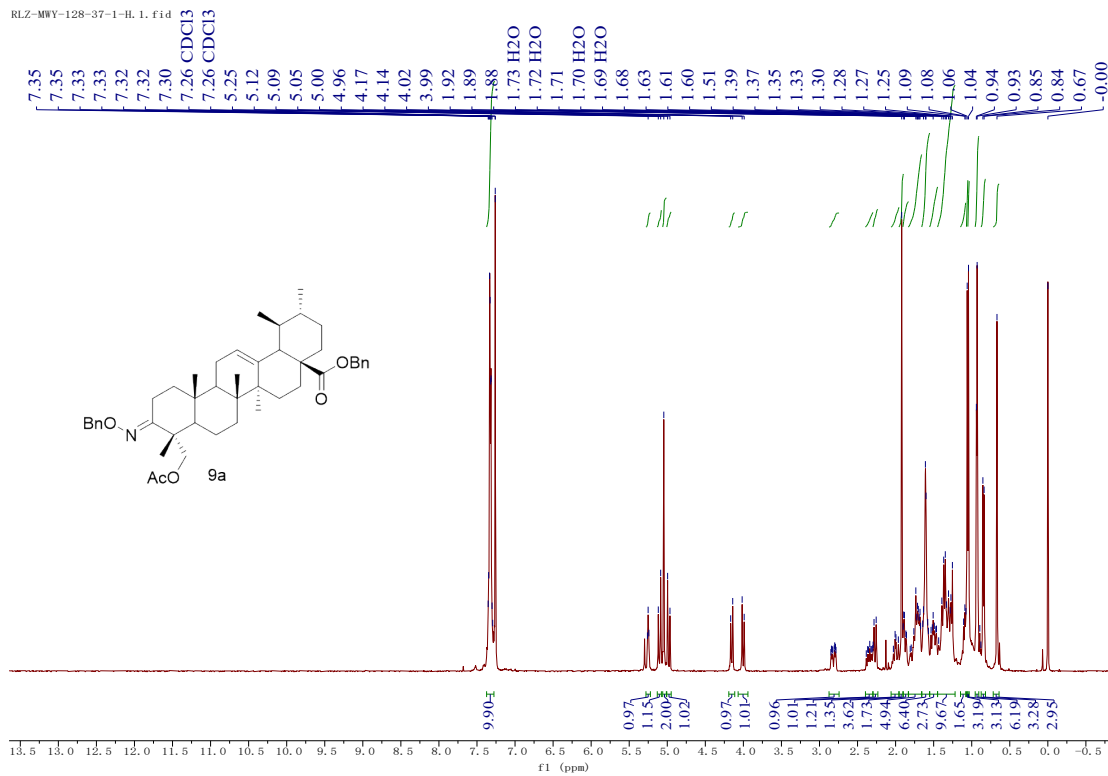

Y10180427-0902-128-37-1.100001.fid

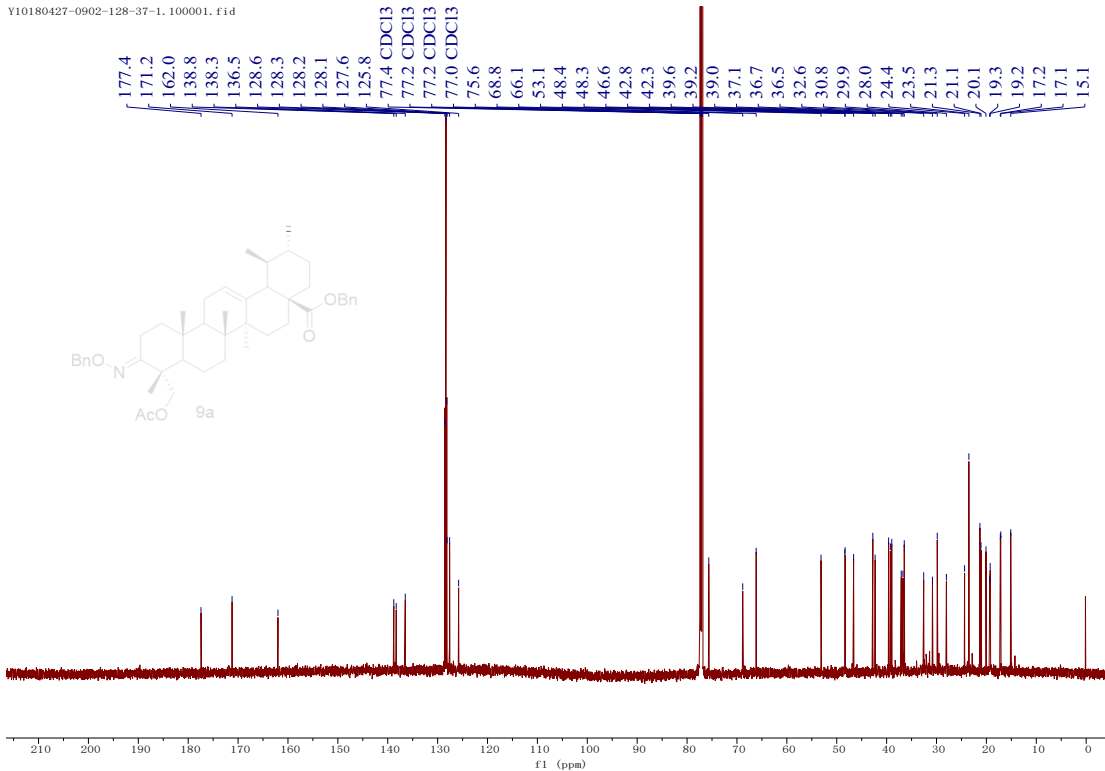

RLZ-MWY-128-37-2-H.fid

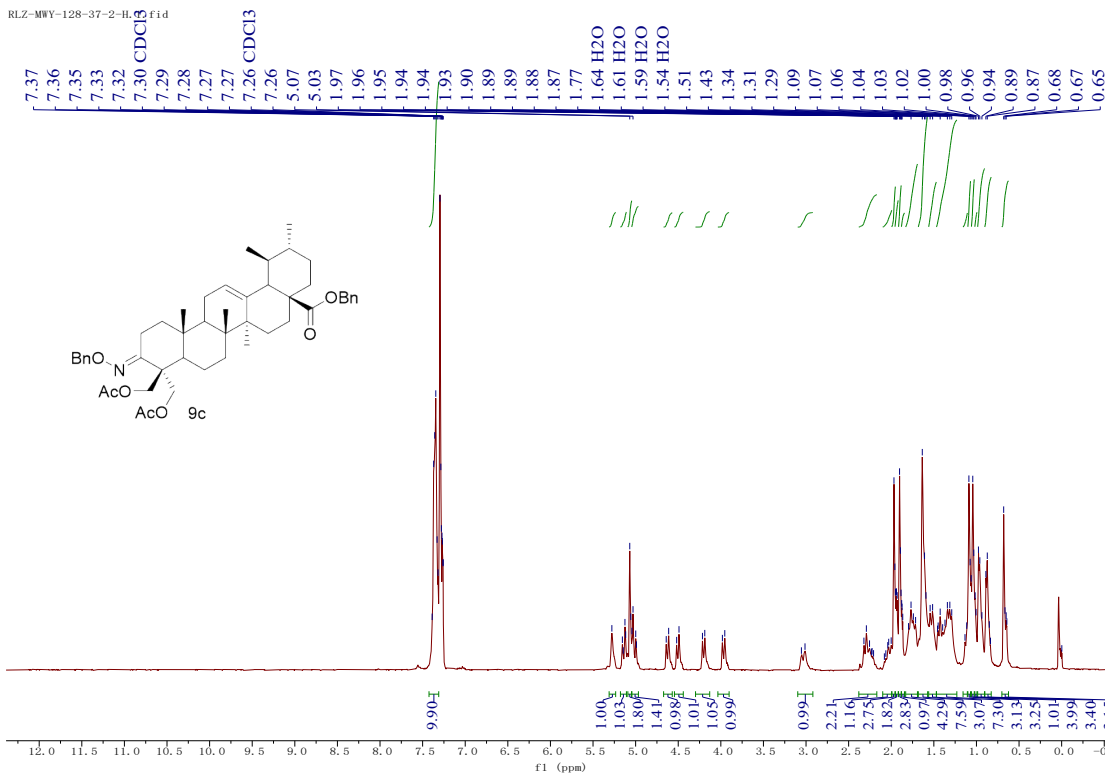

Y10180427-0902-128-37-2. 100001. f1d

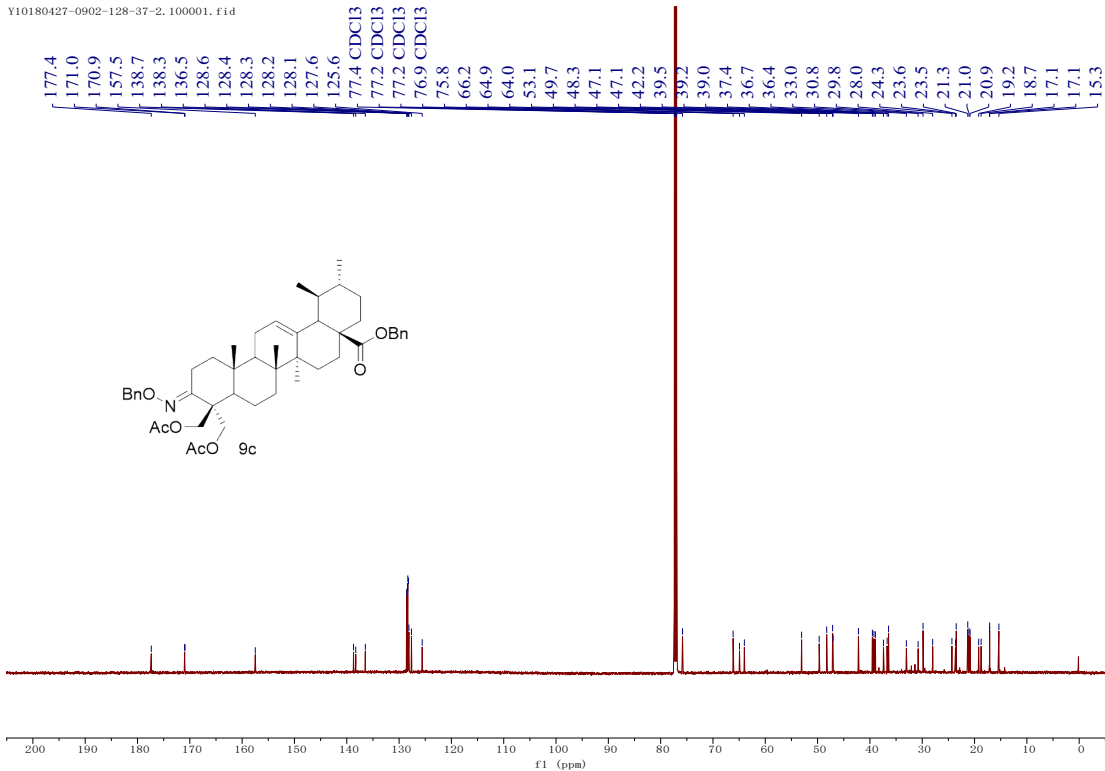

RLZ-MWY-128-29-H. 1. f1d

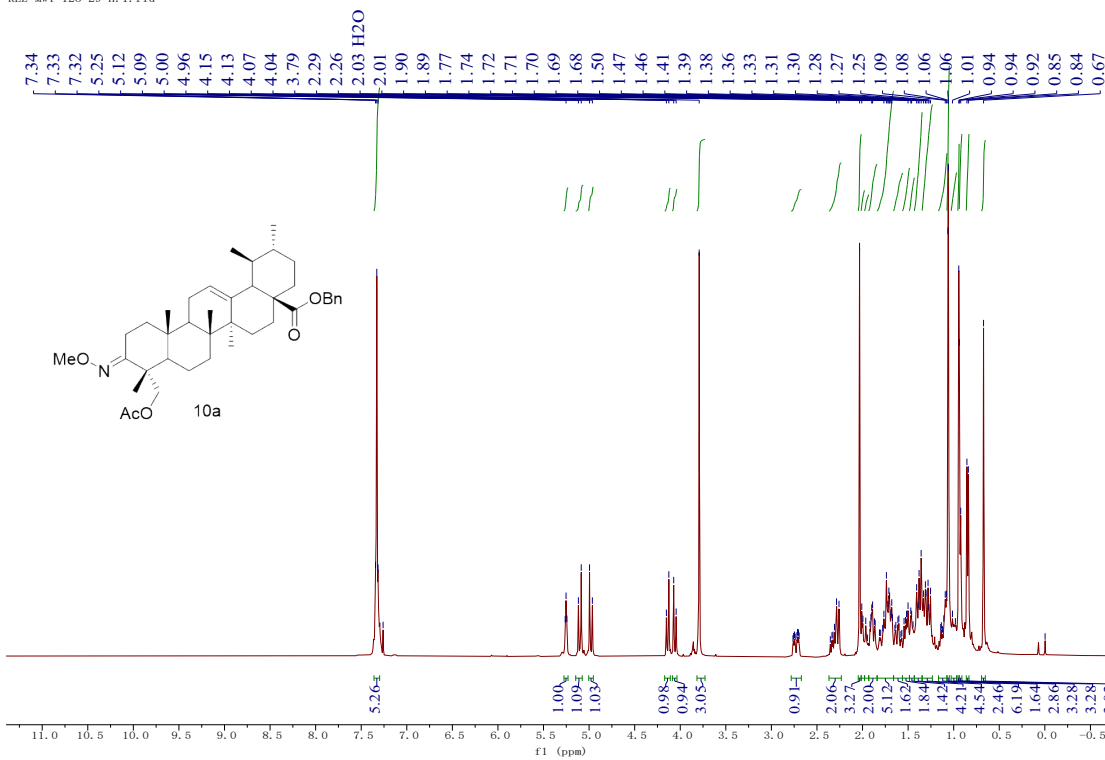



RLZ-MFY-128-29-C.1.fid

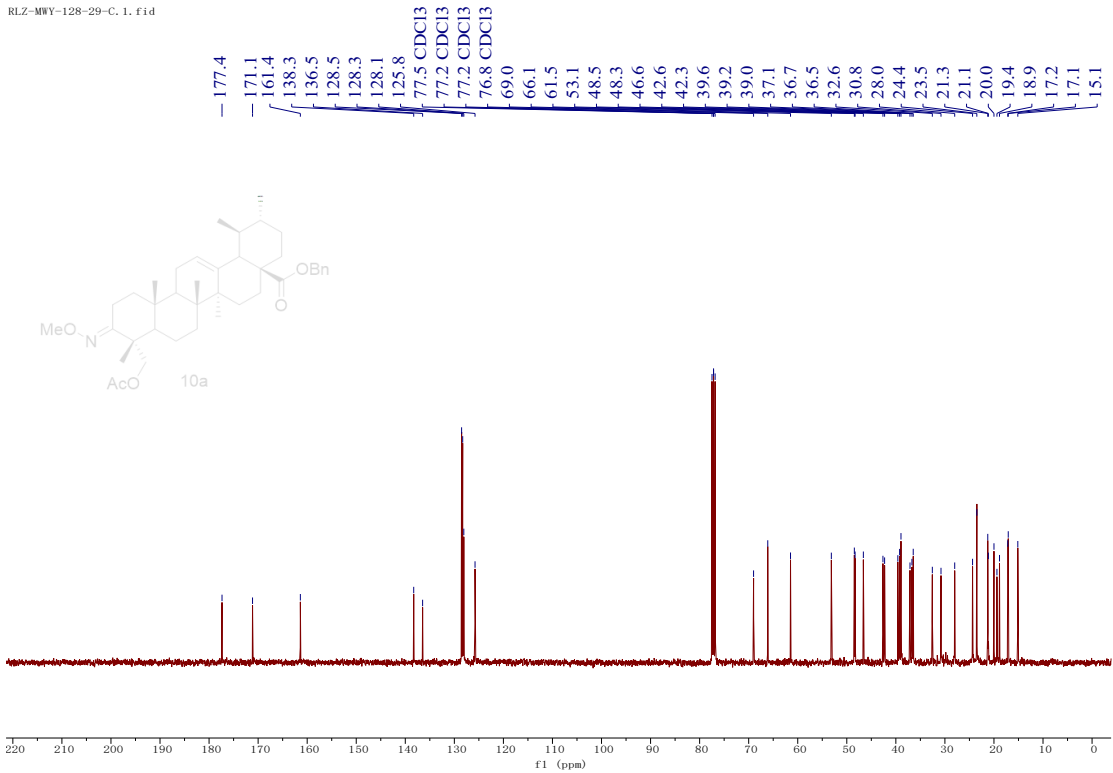

Y10180427-0827-100-7-1.1.fid

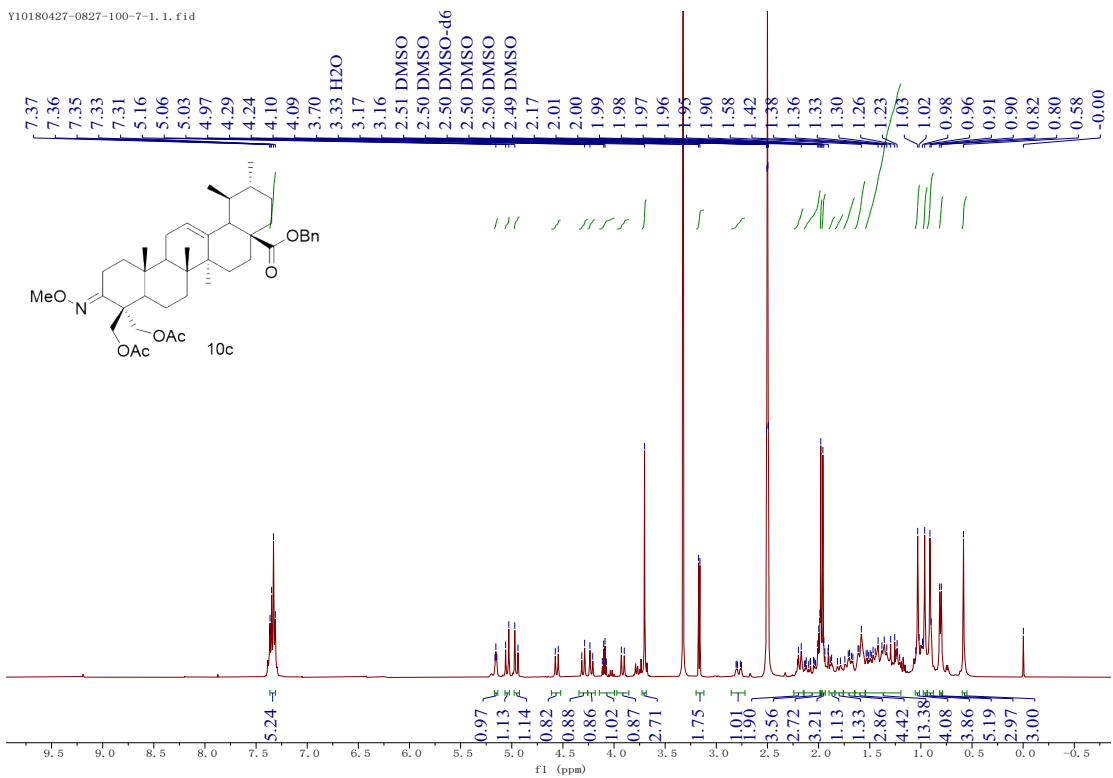

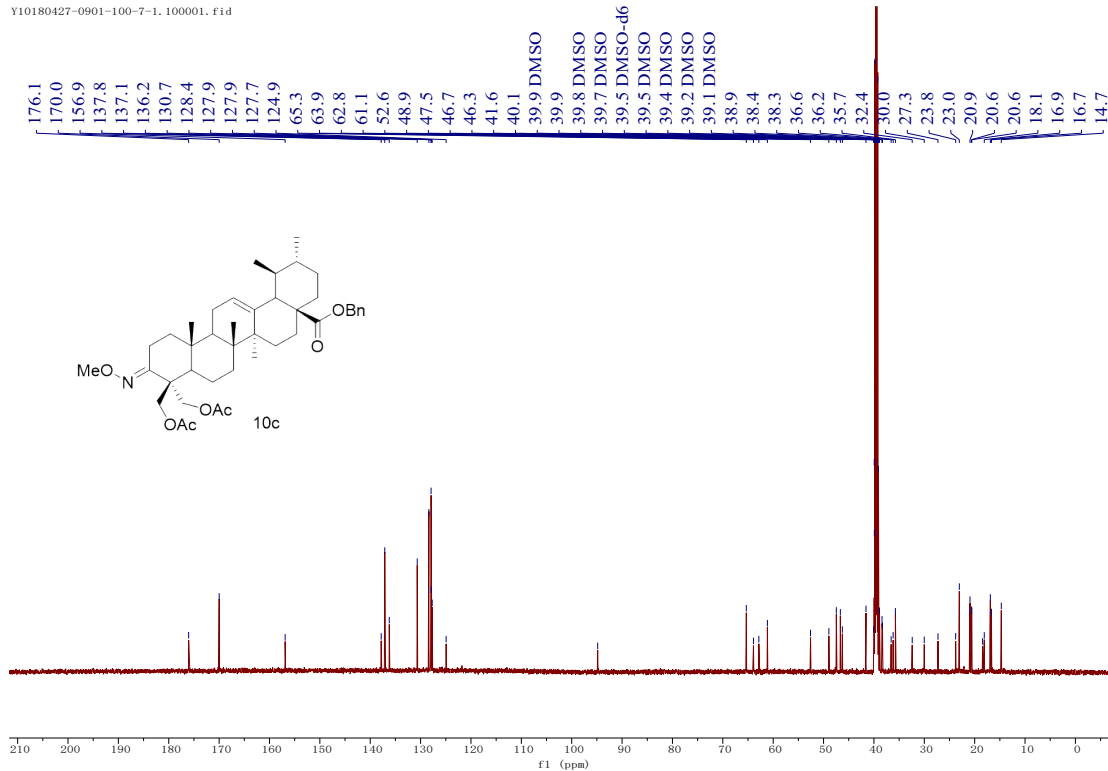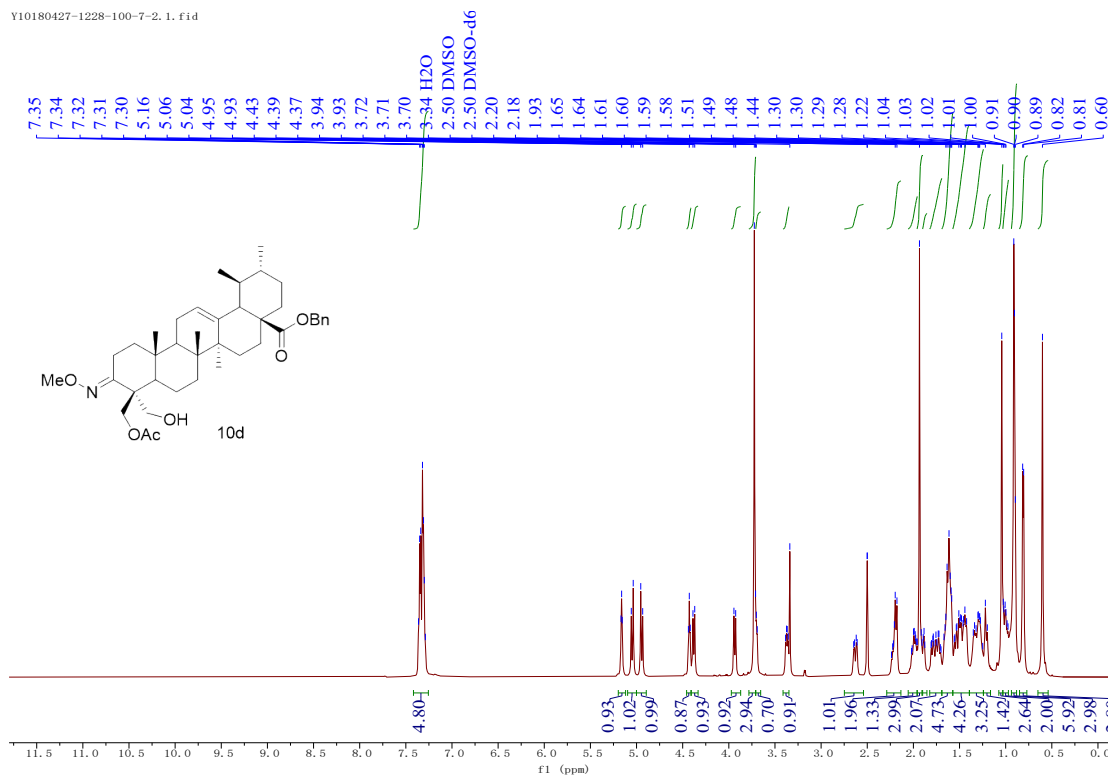

Y10180427-0901-100-7-2. 100001. F1d

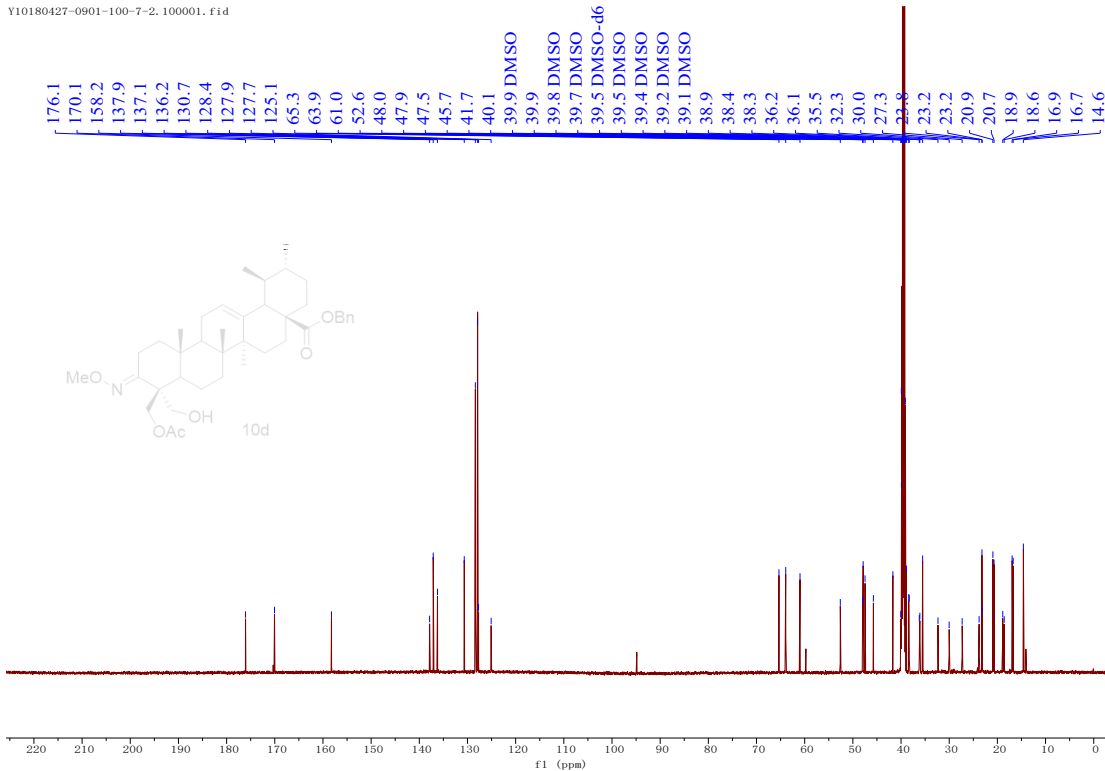

Y10180427-0827-100-7-3. 1. F1d

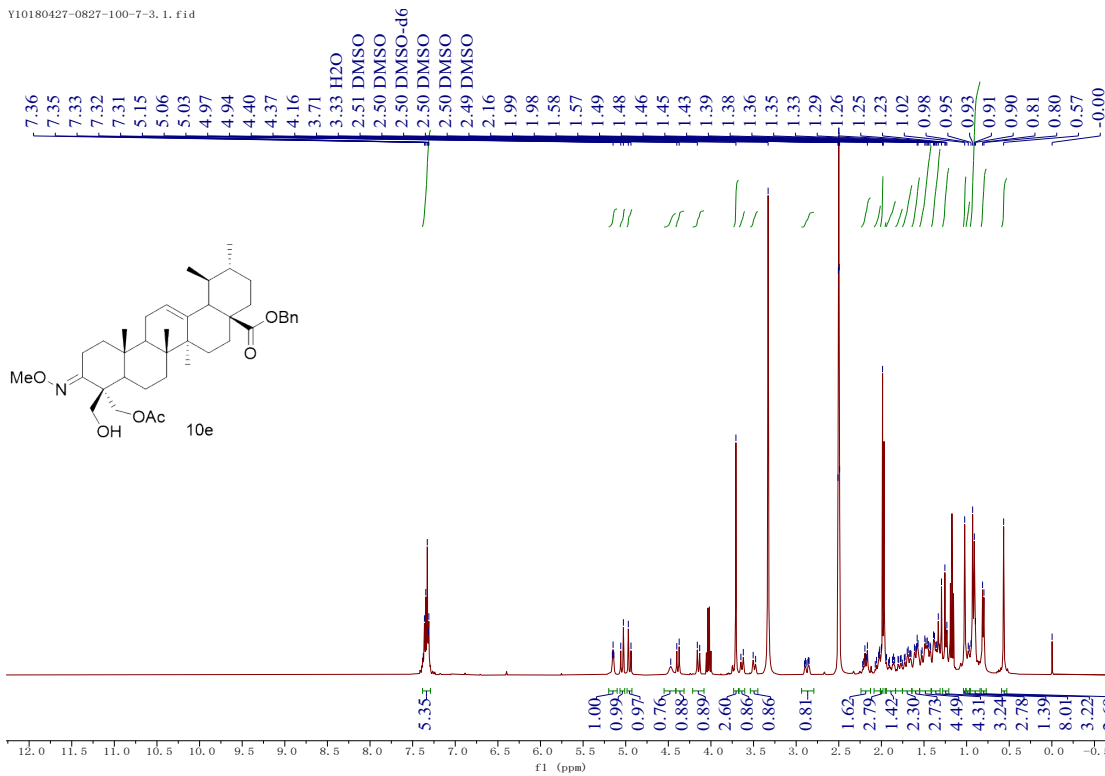

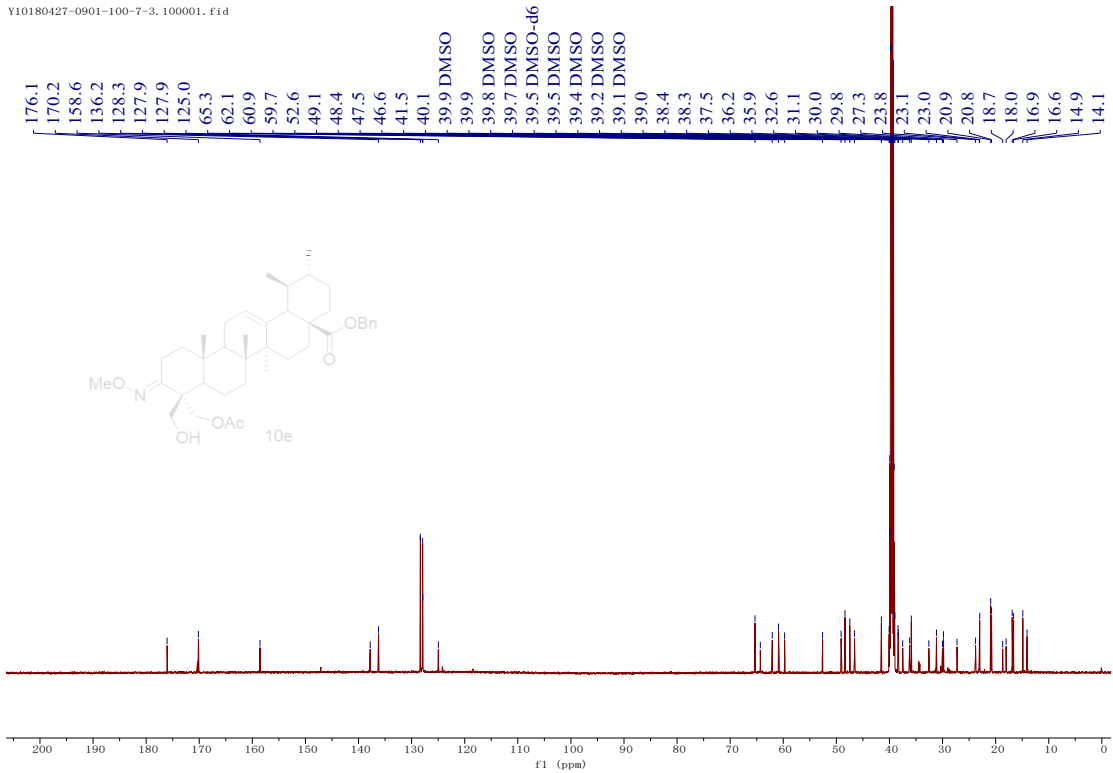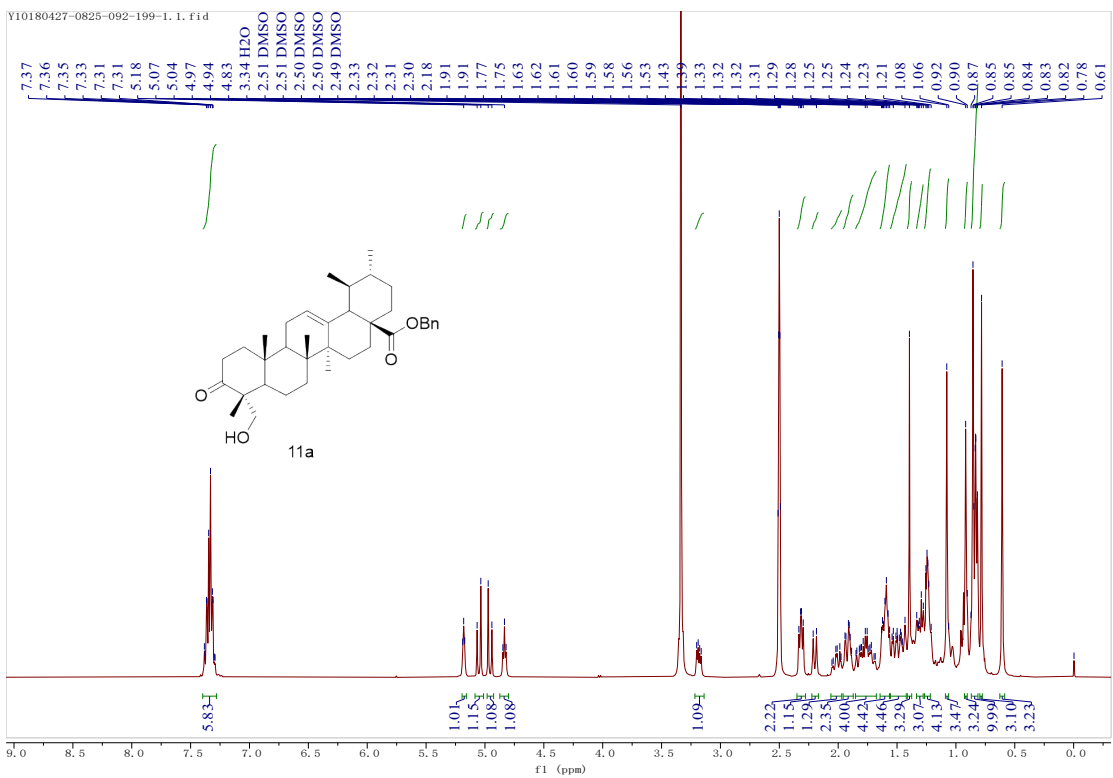

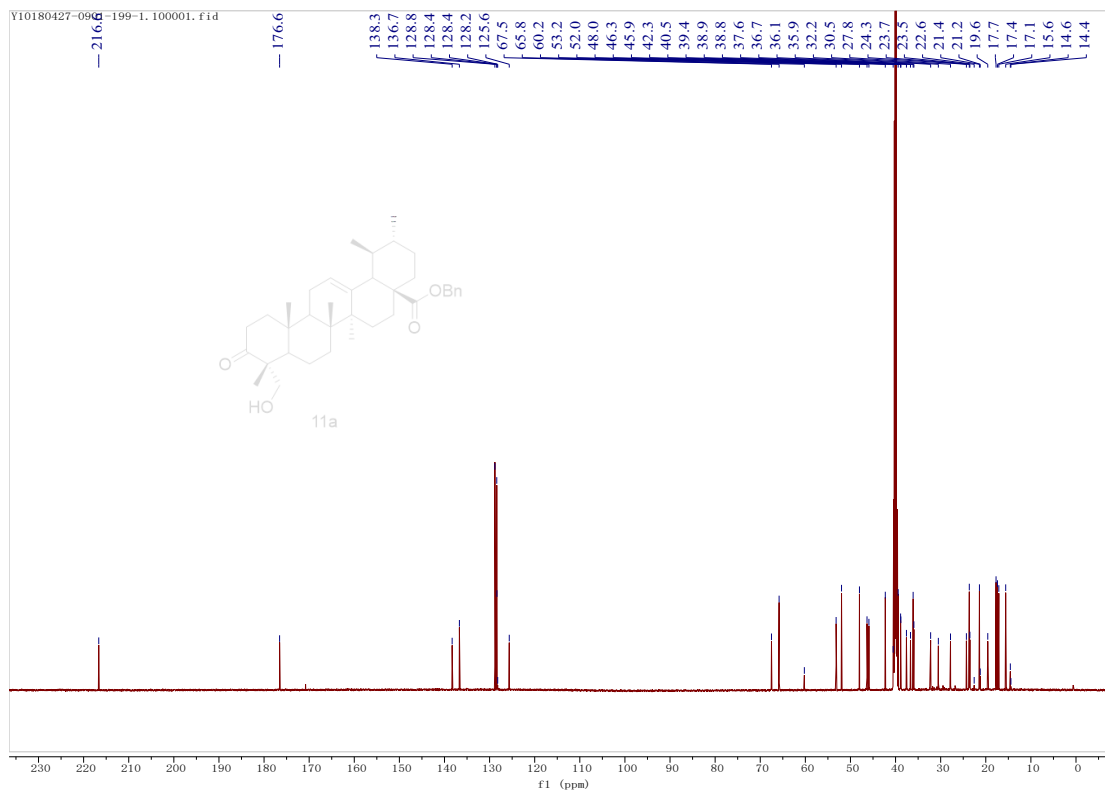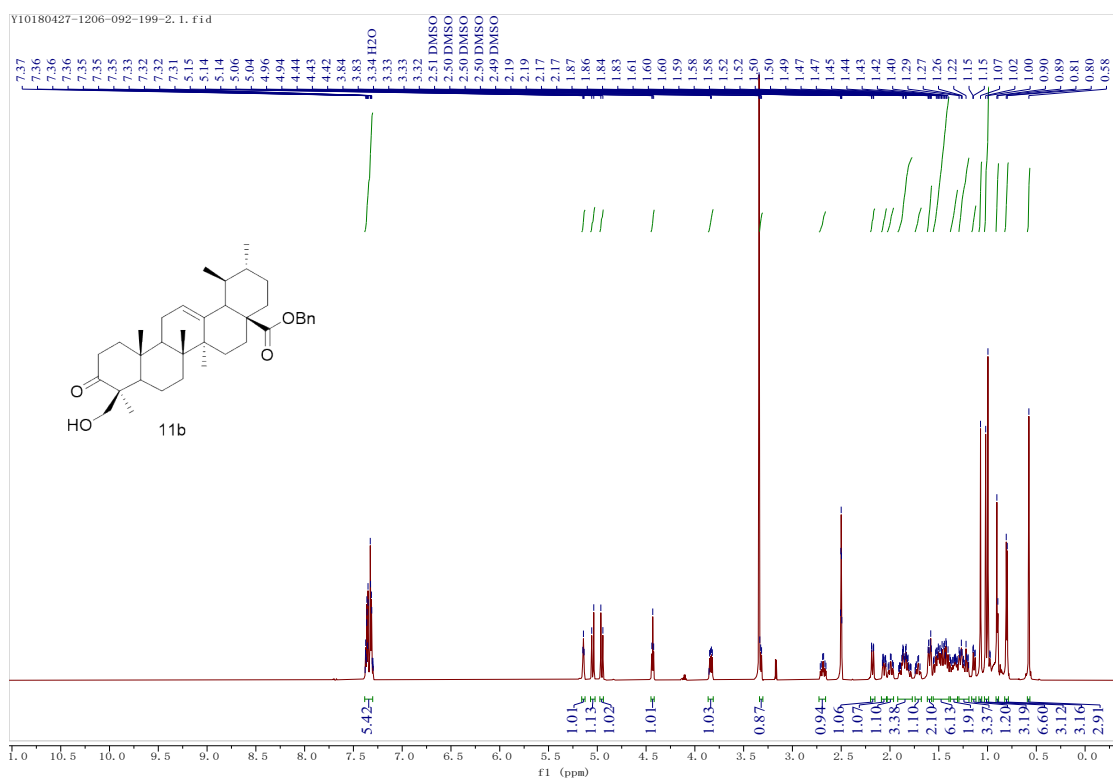

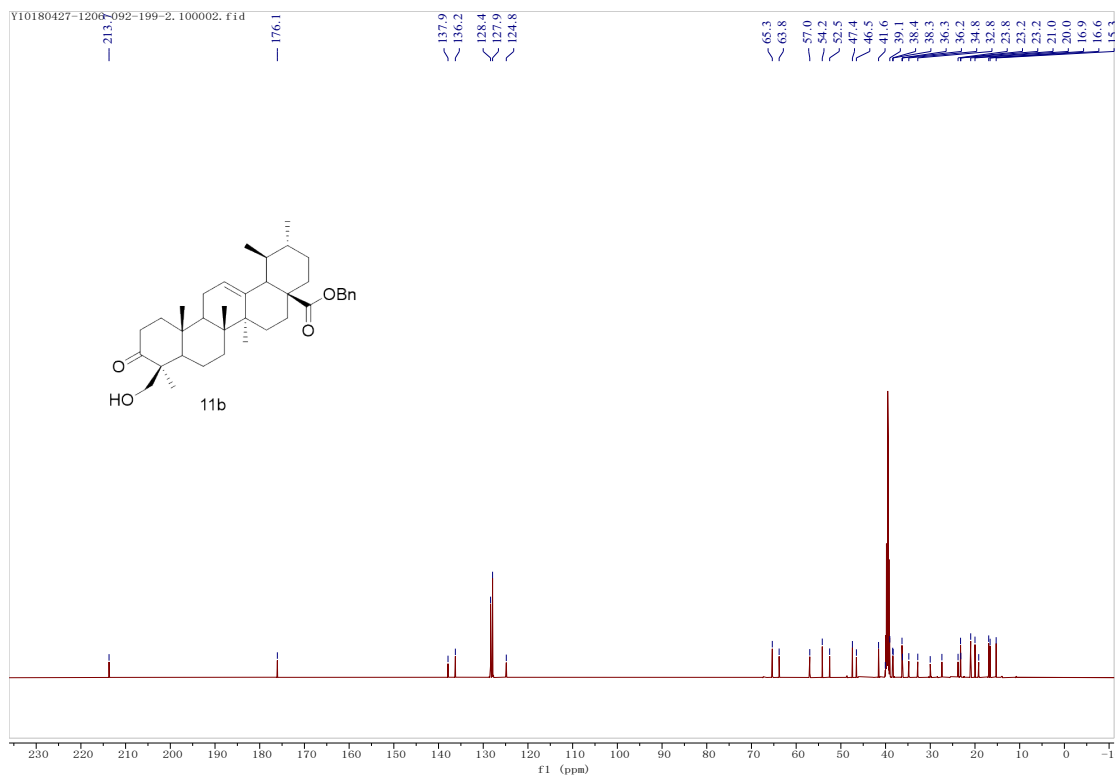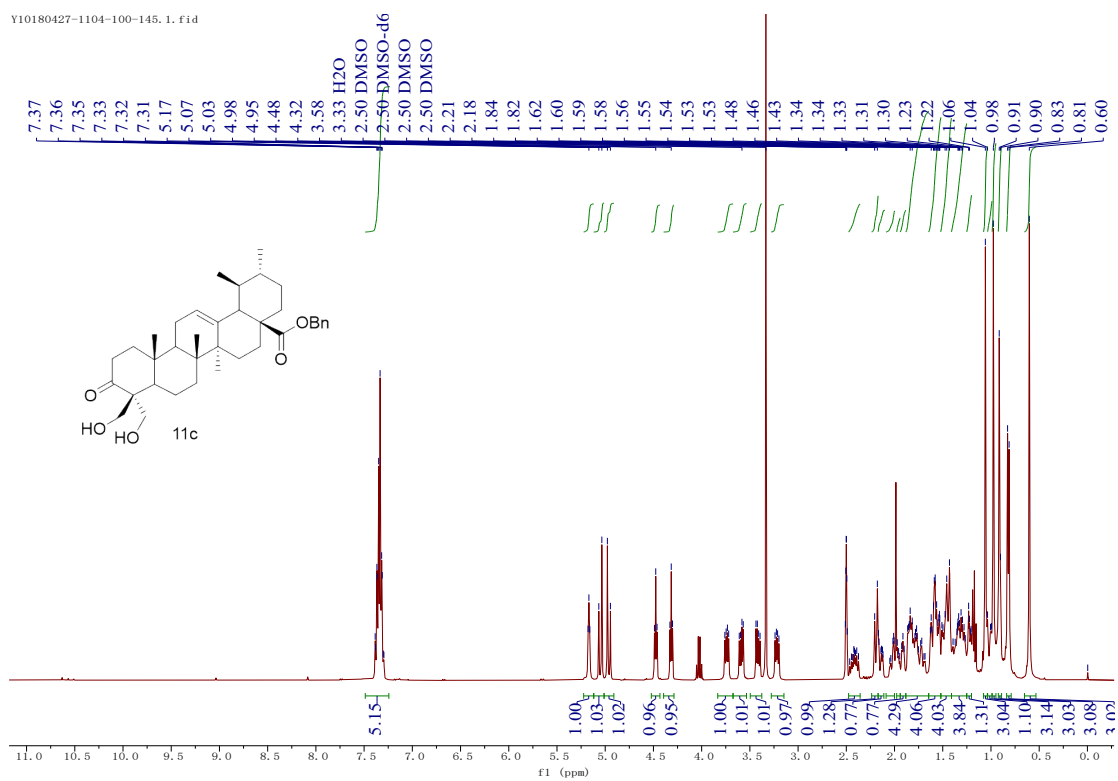

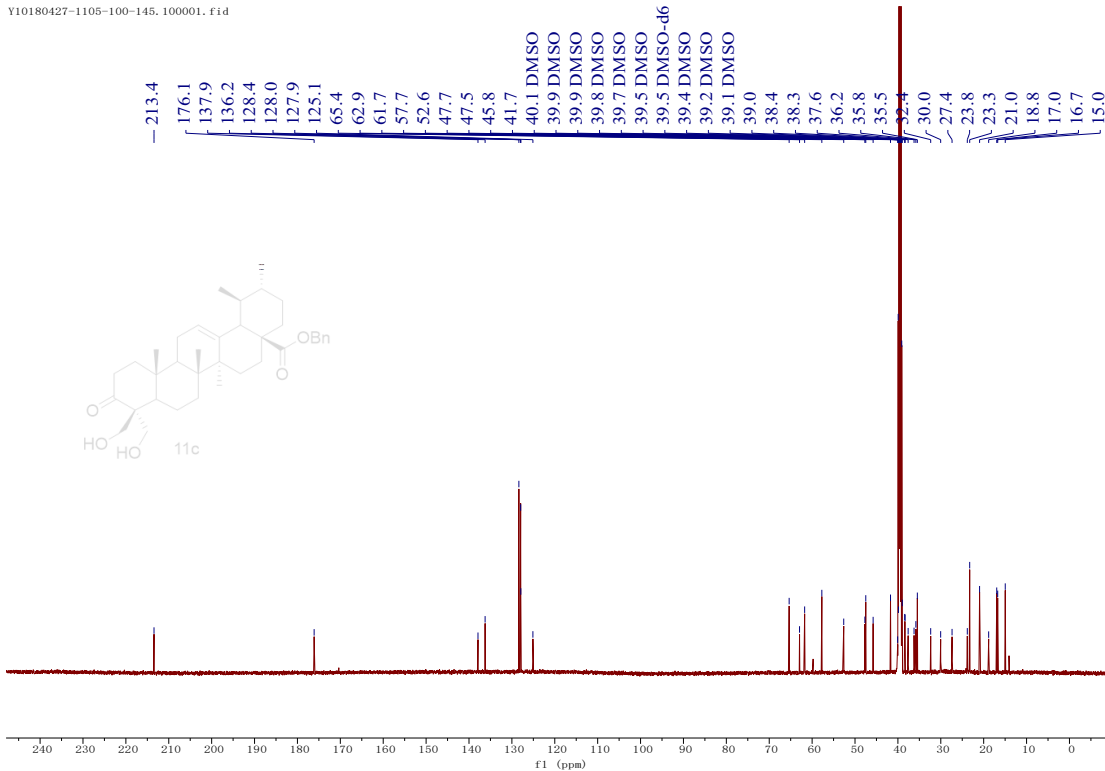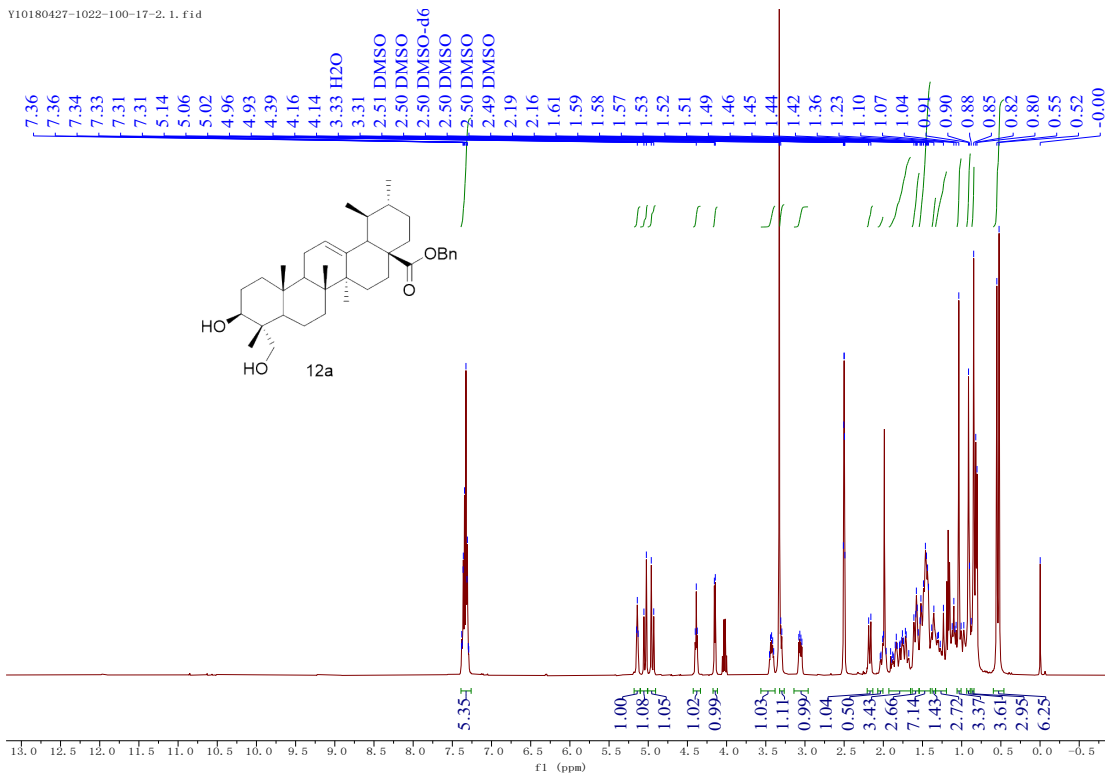

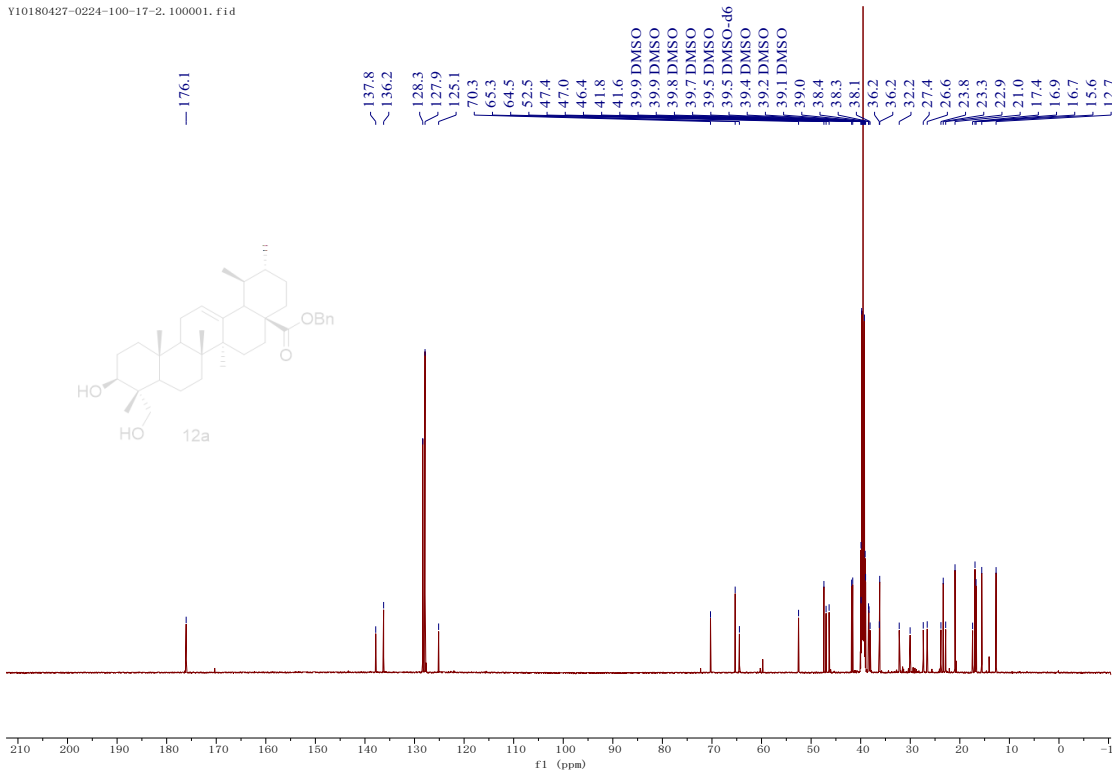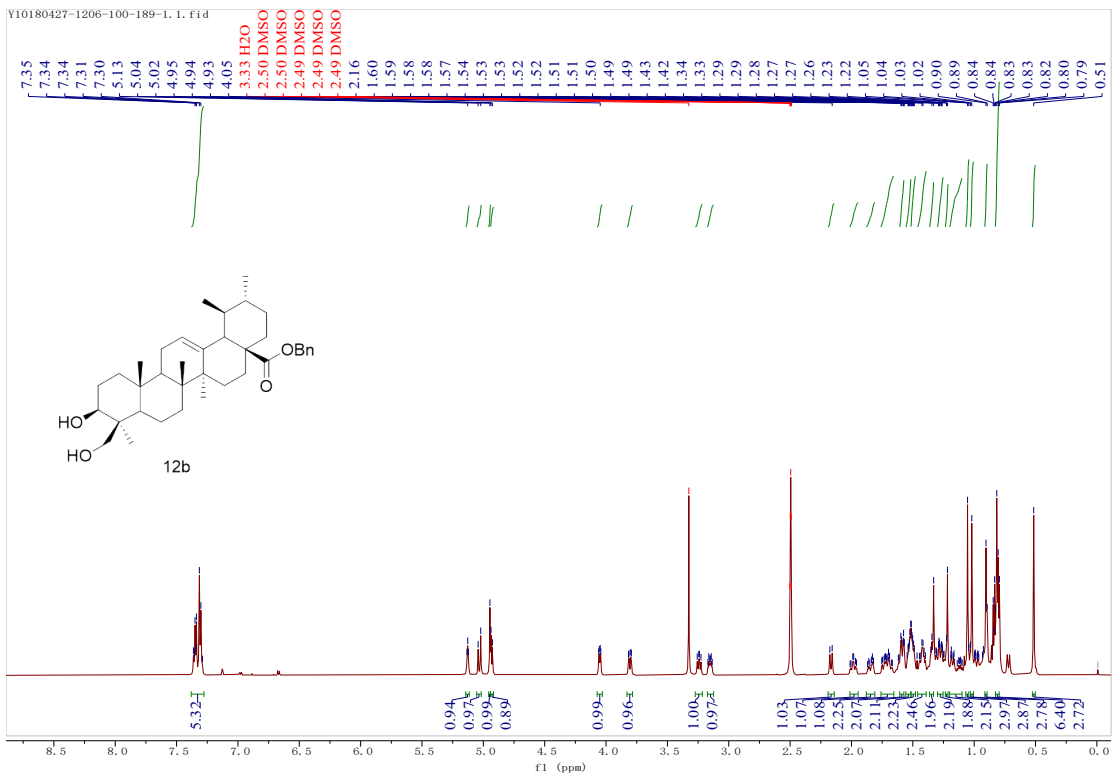



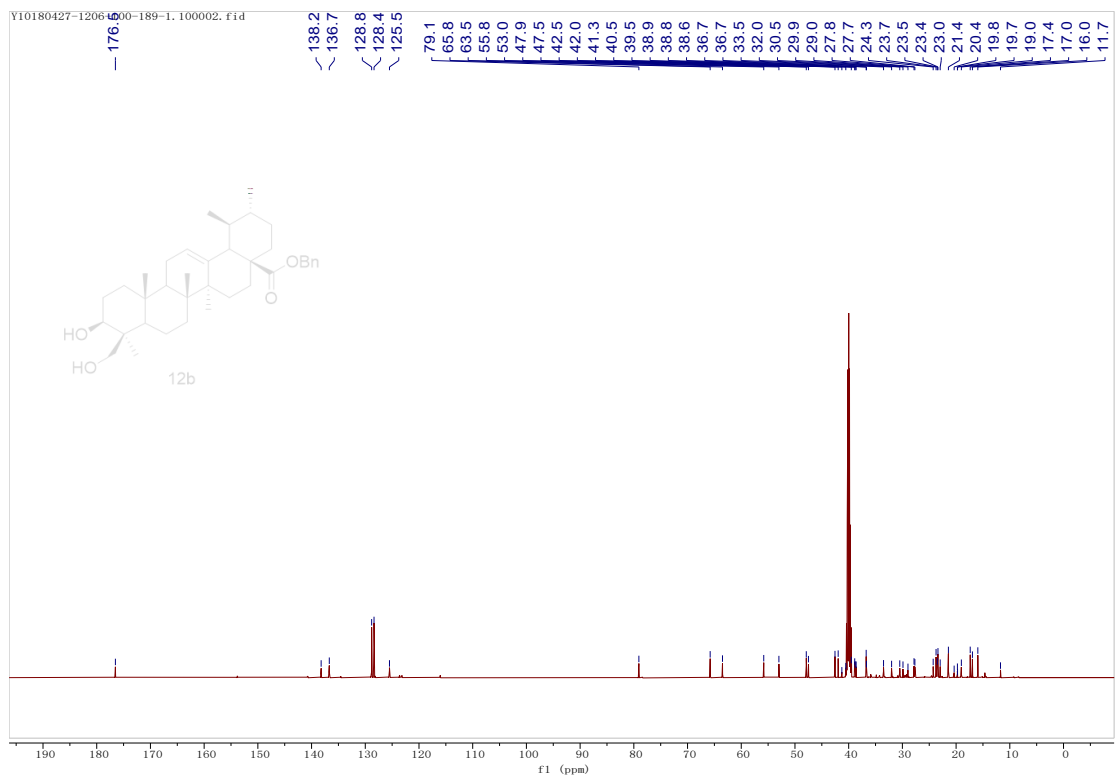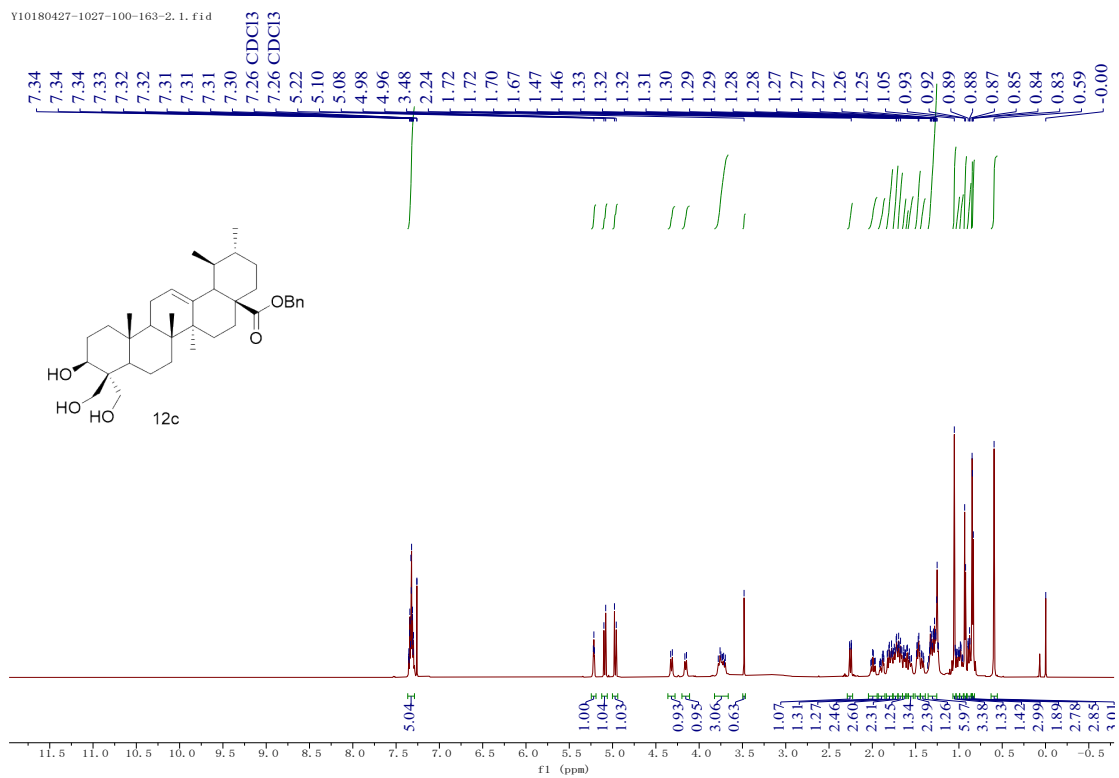

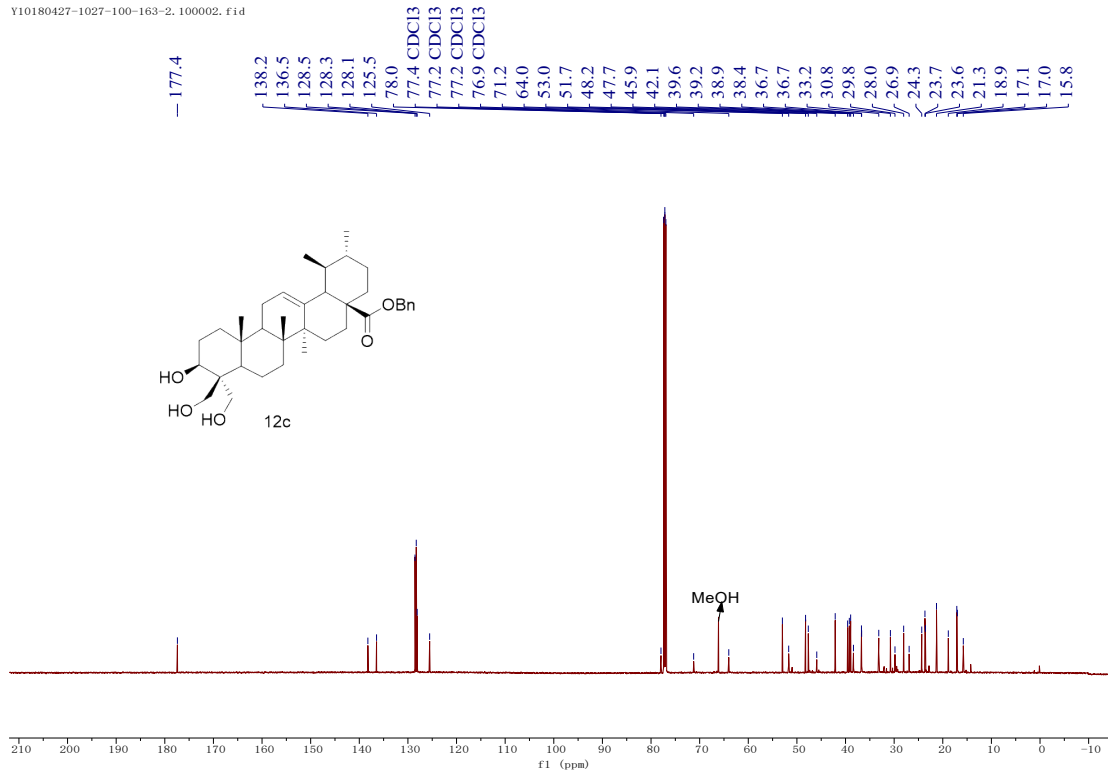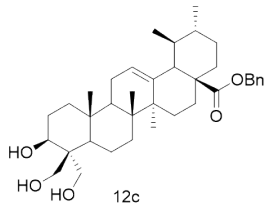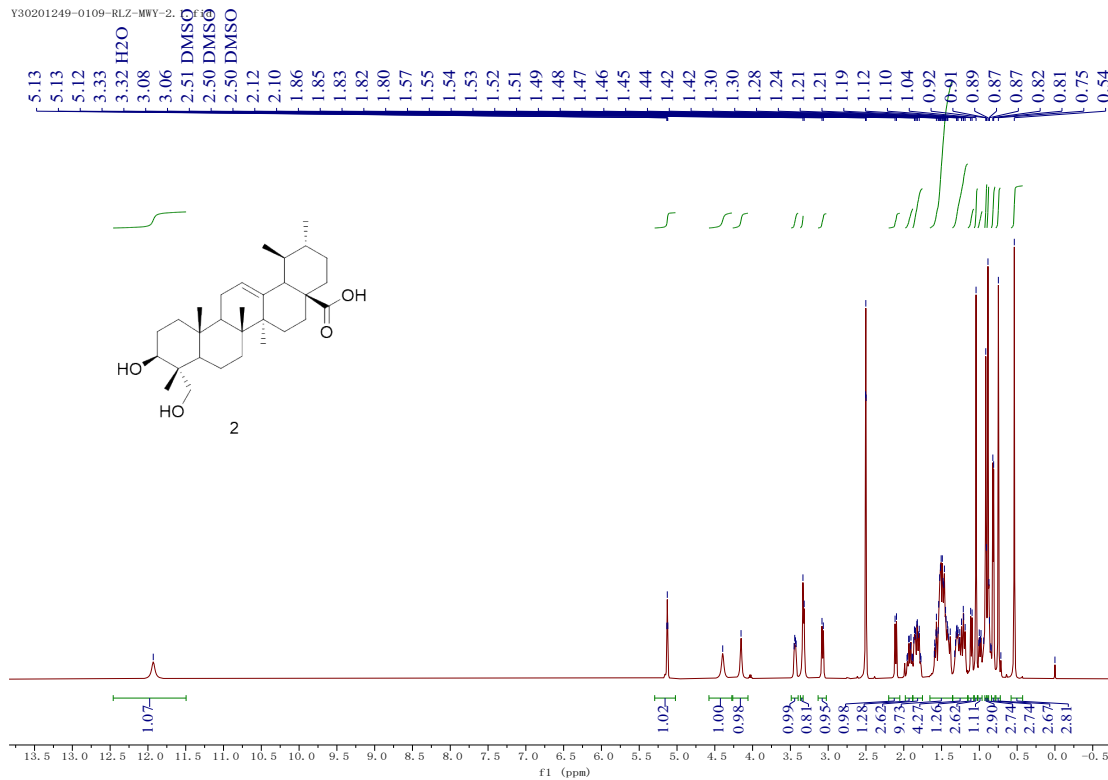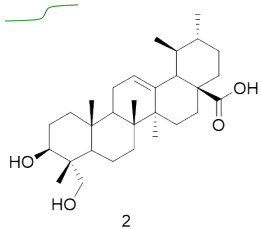

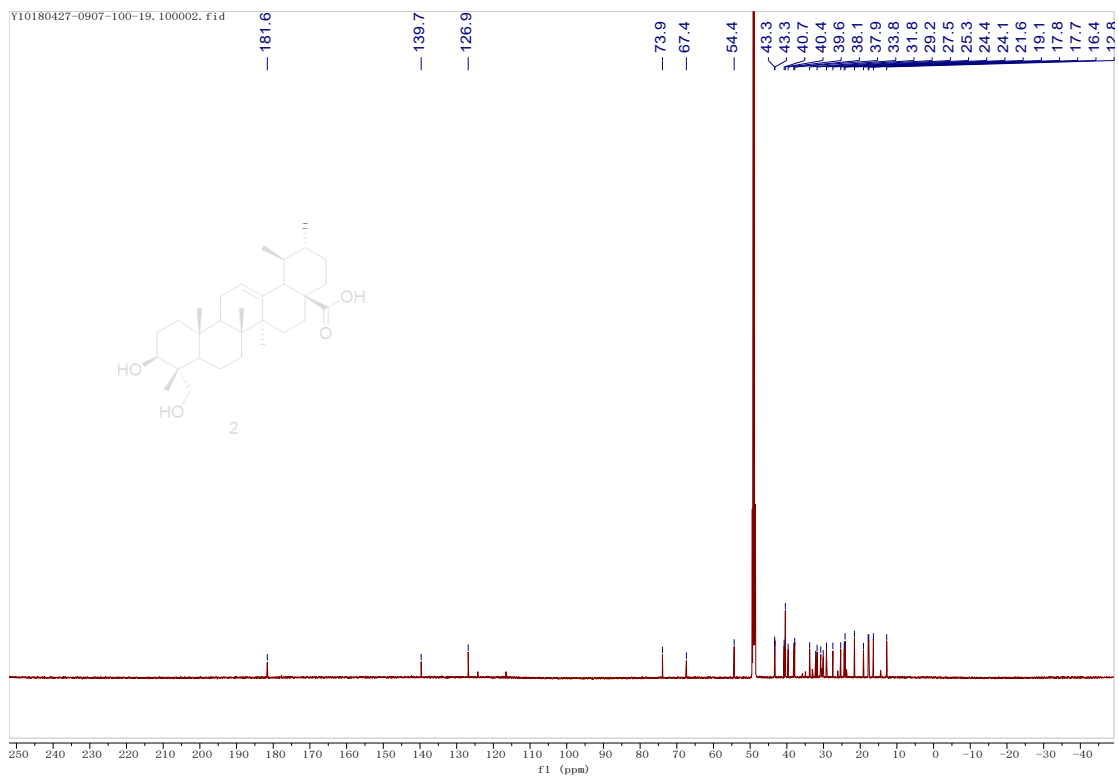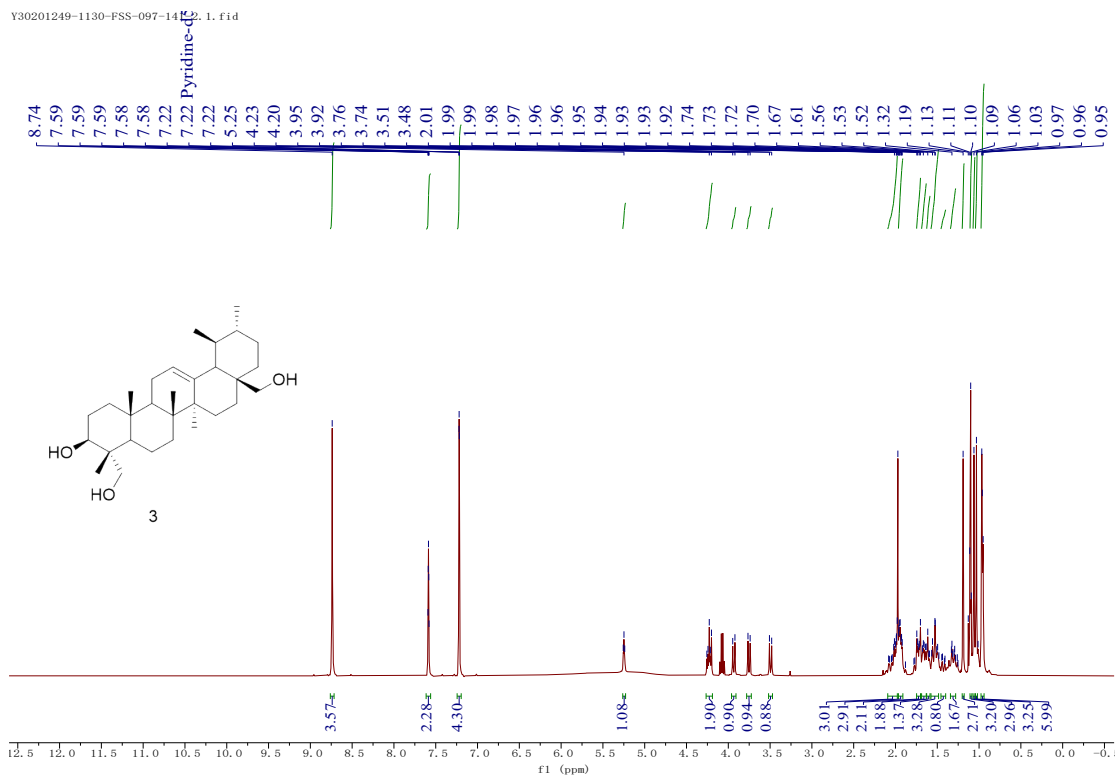

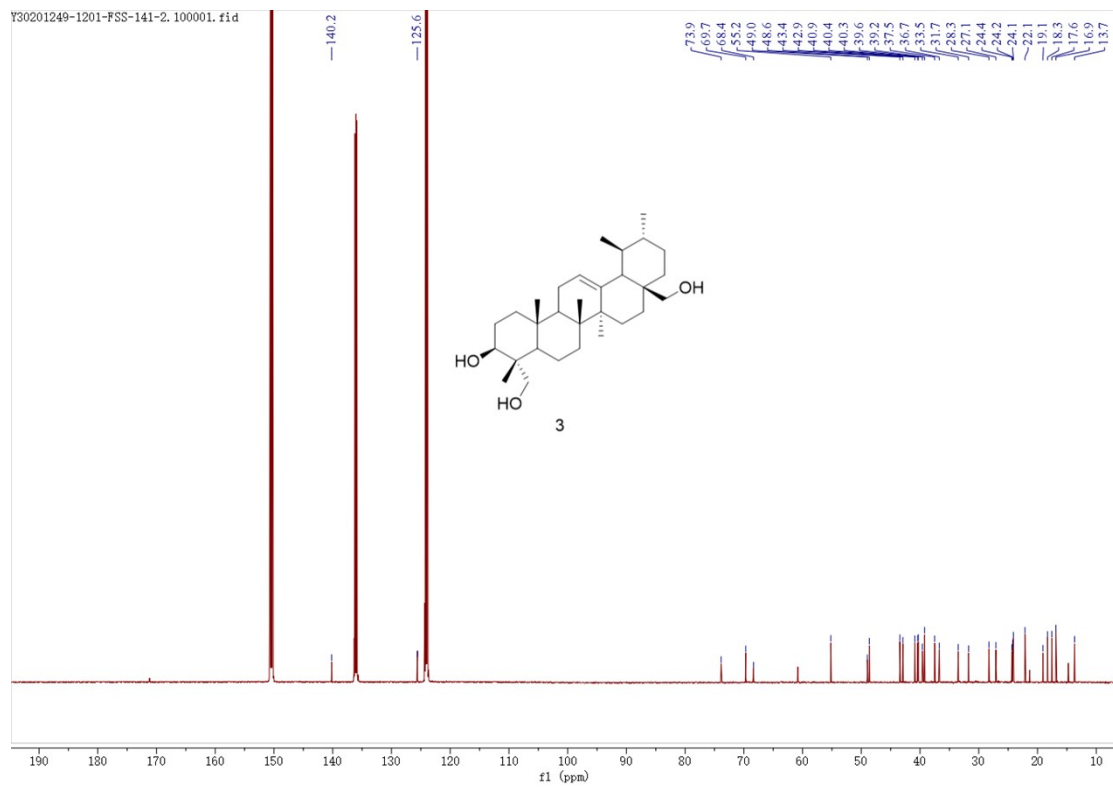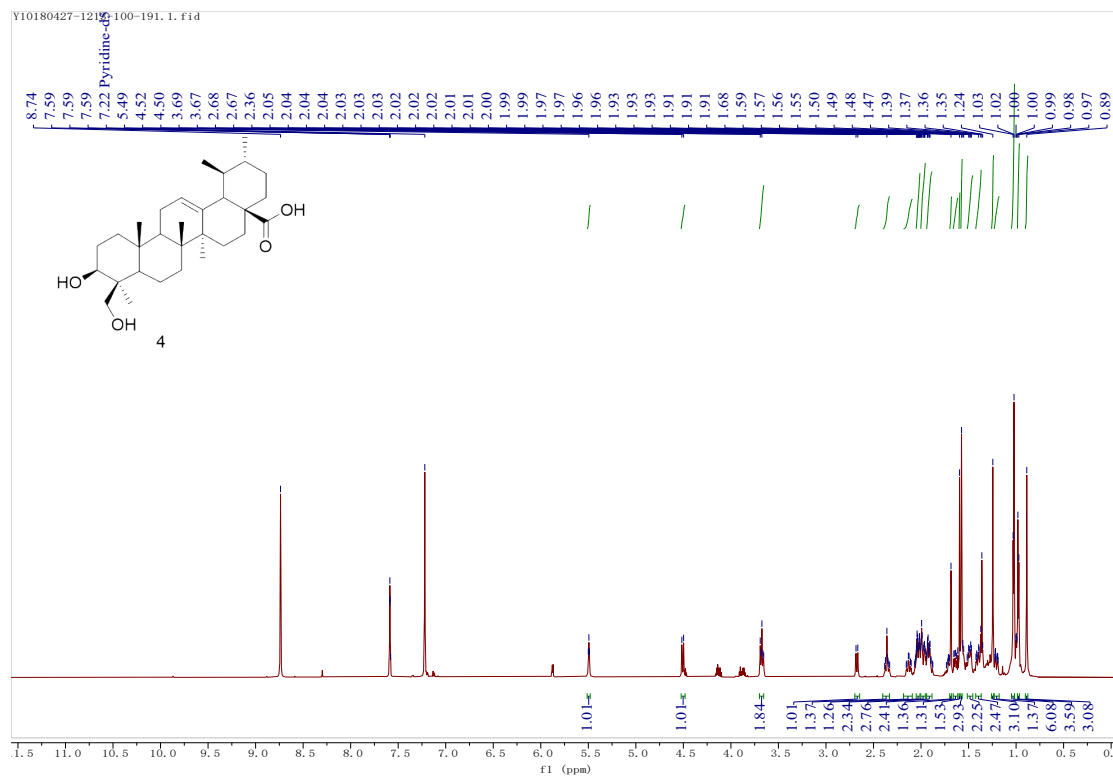

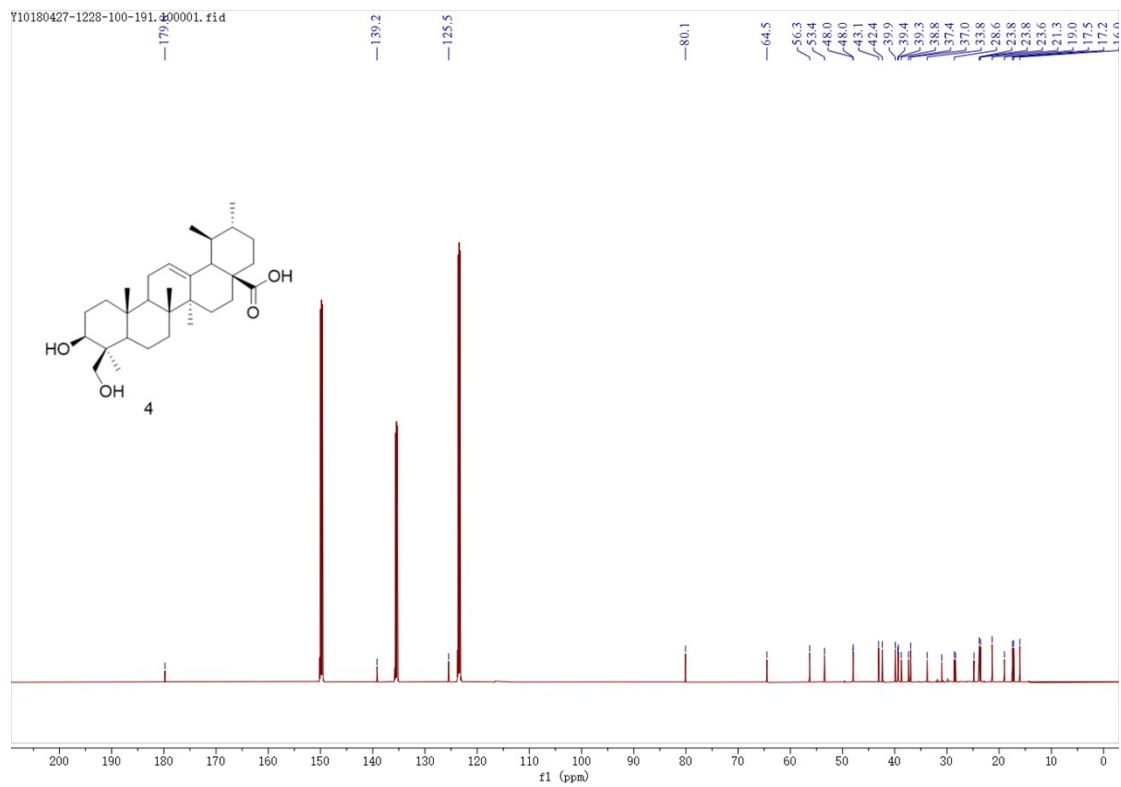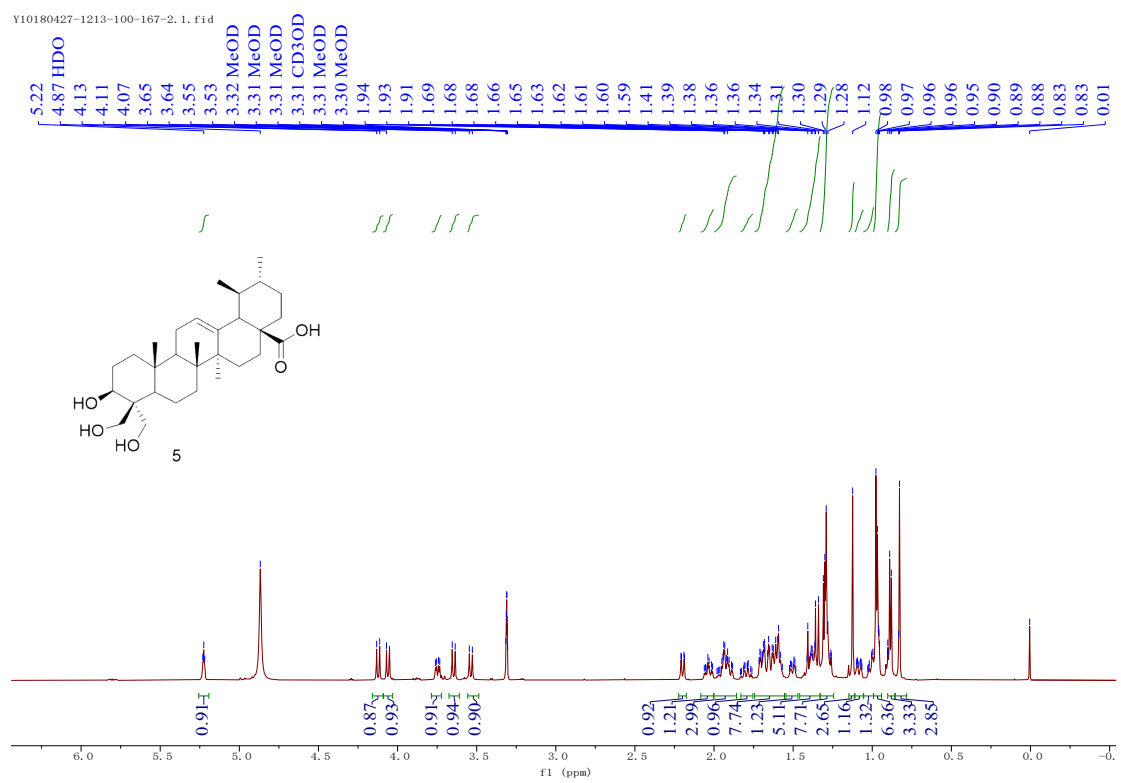

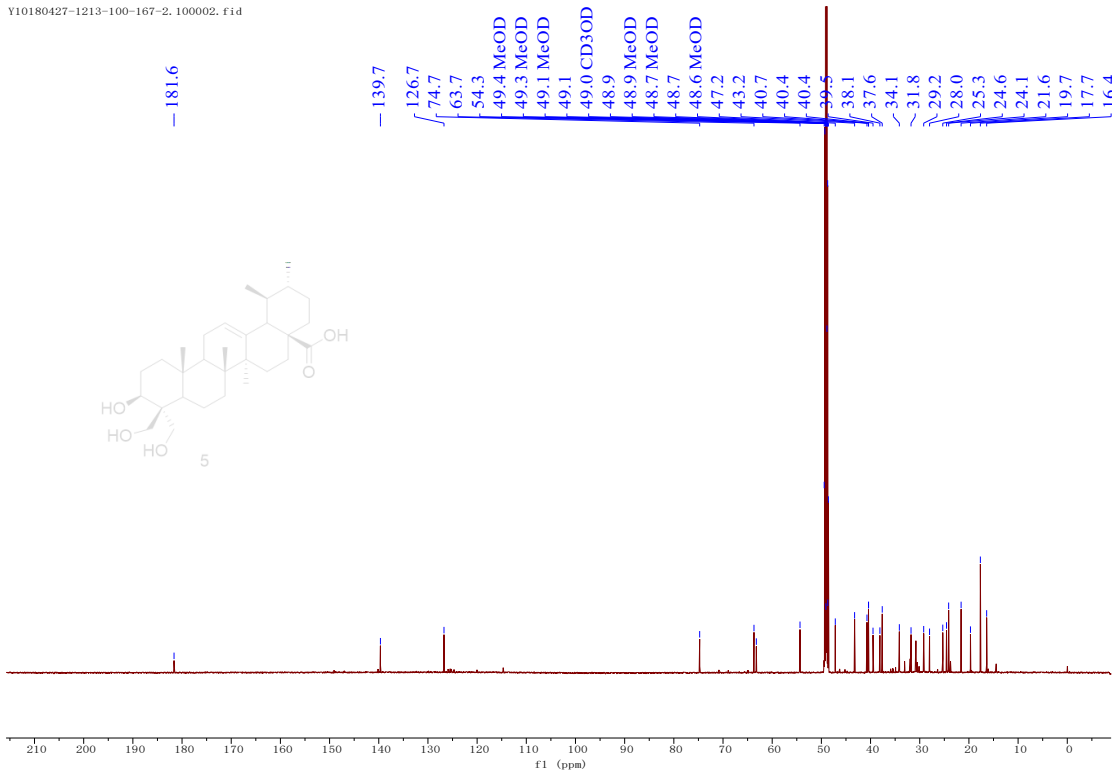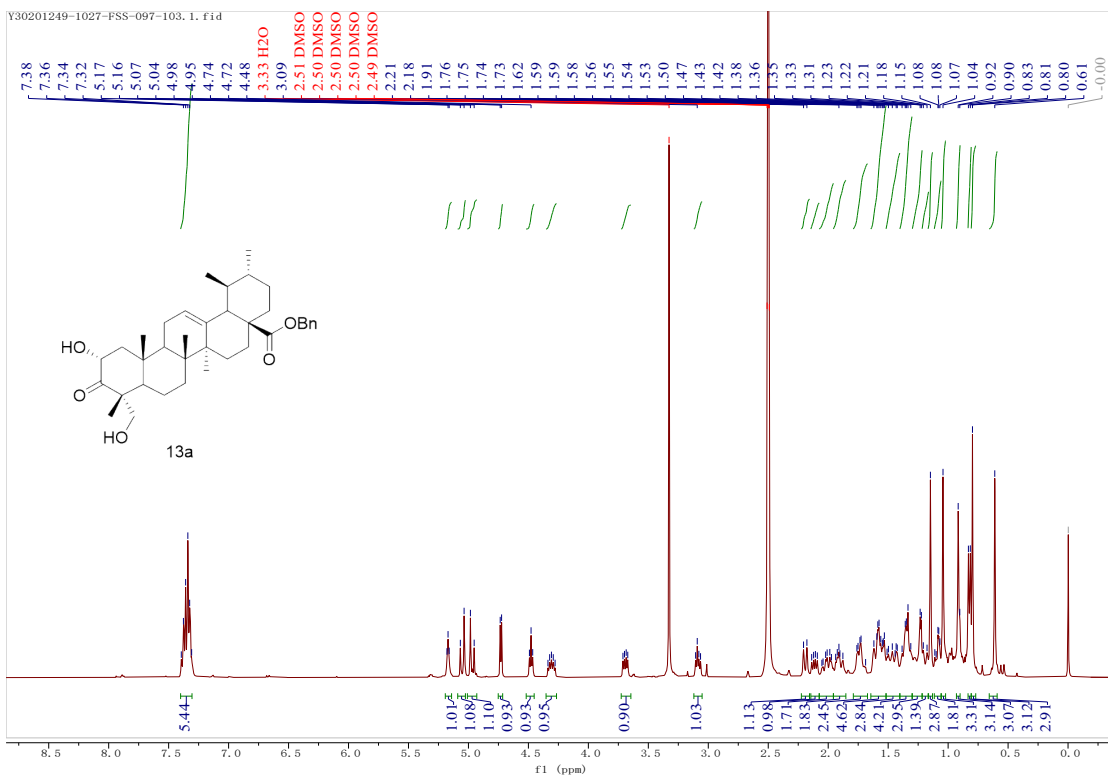

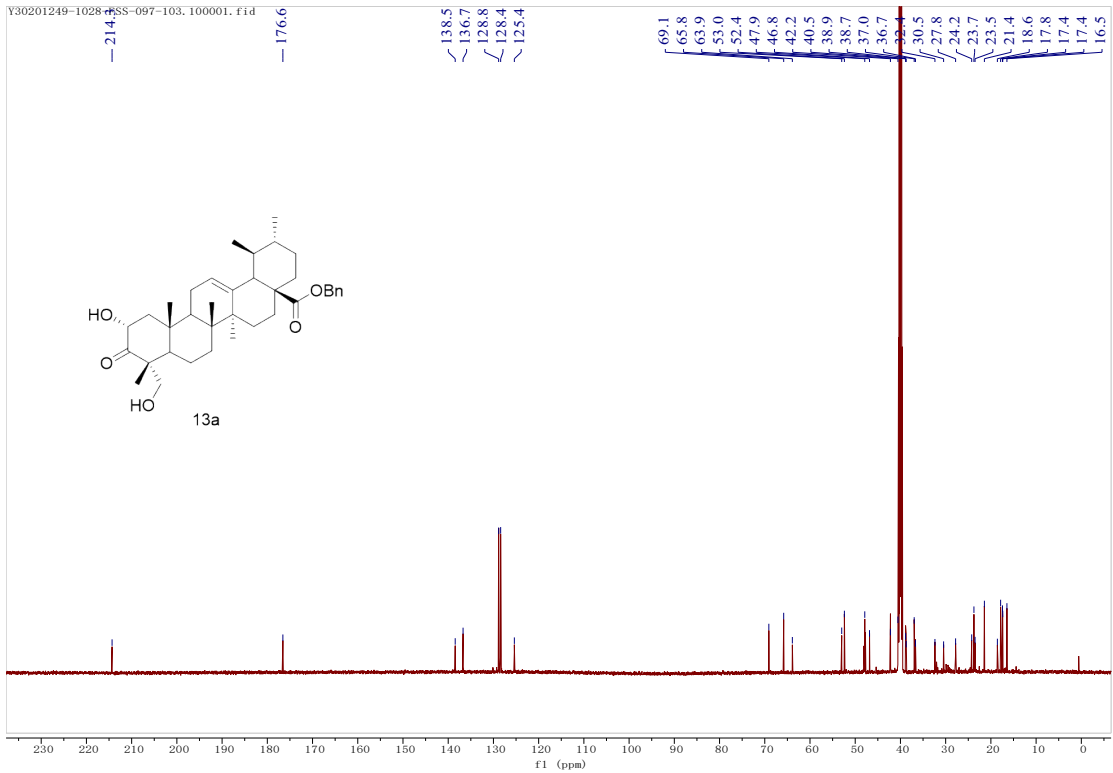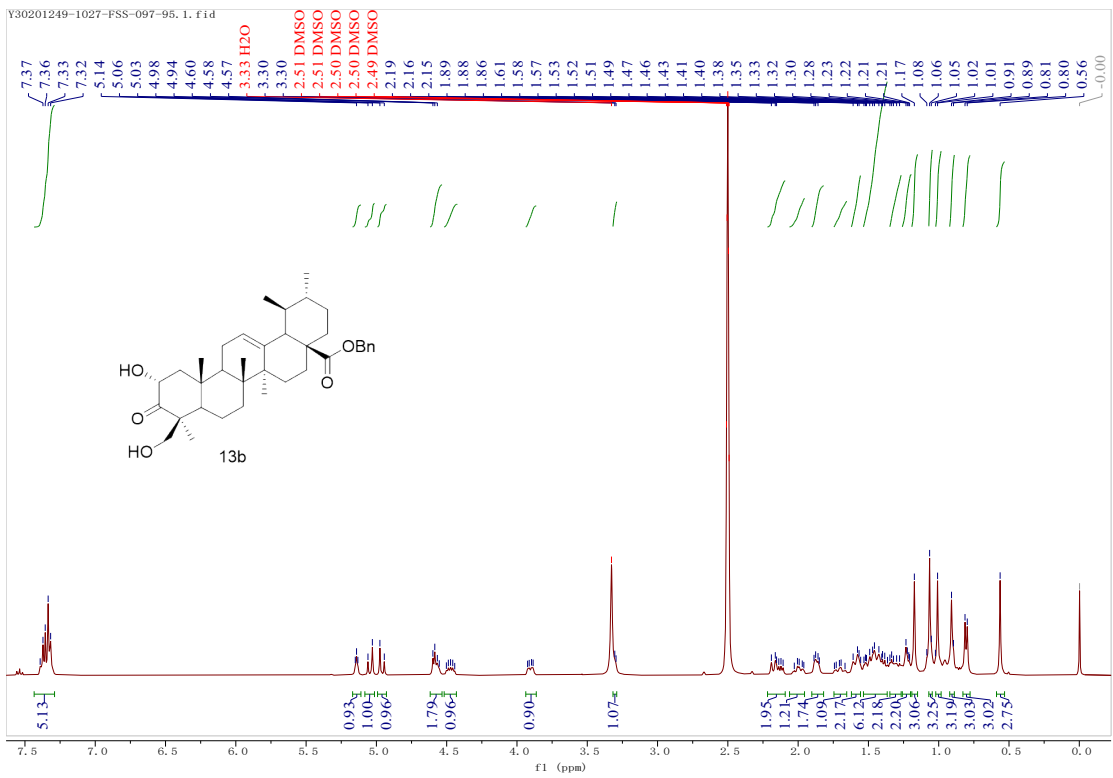

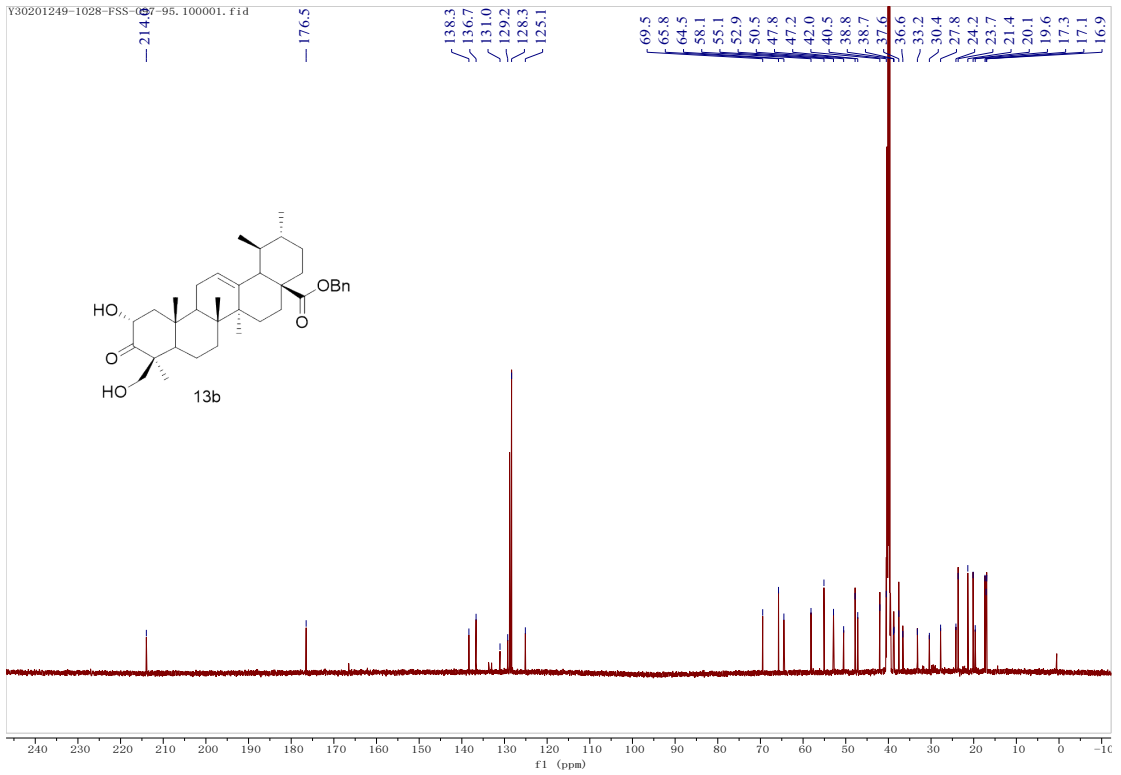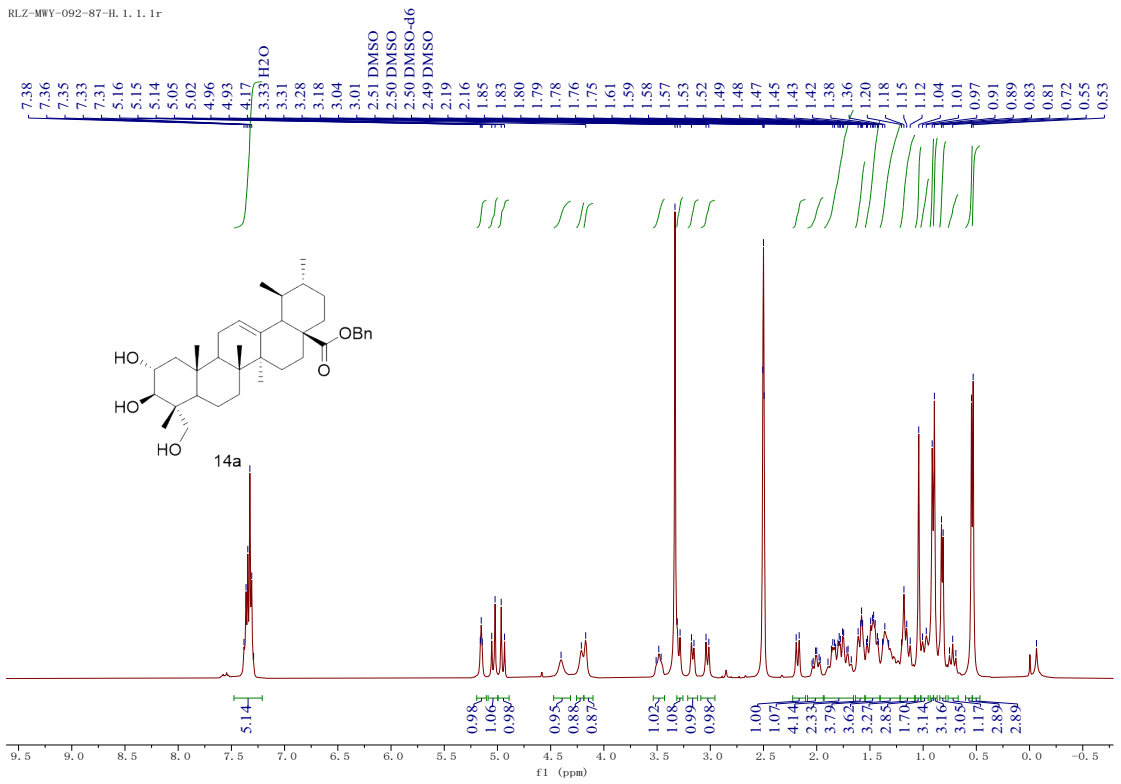



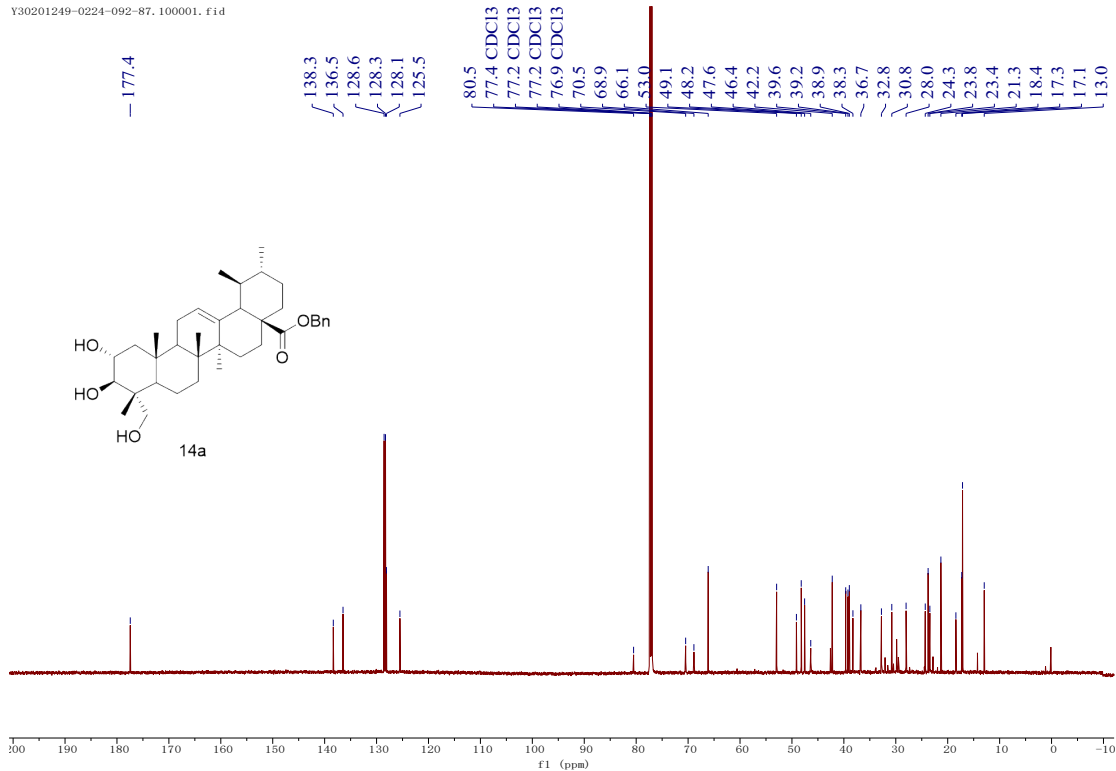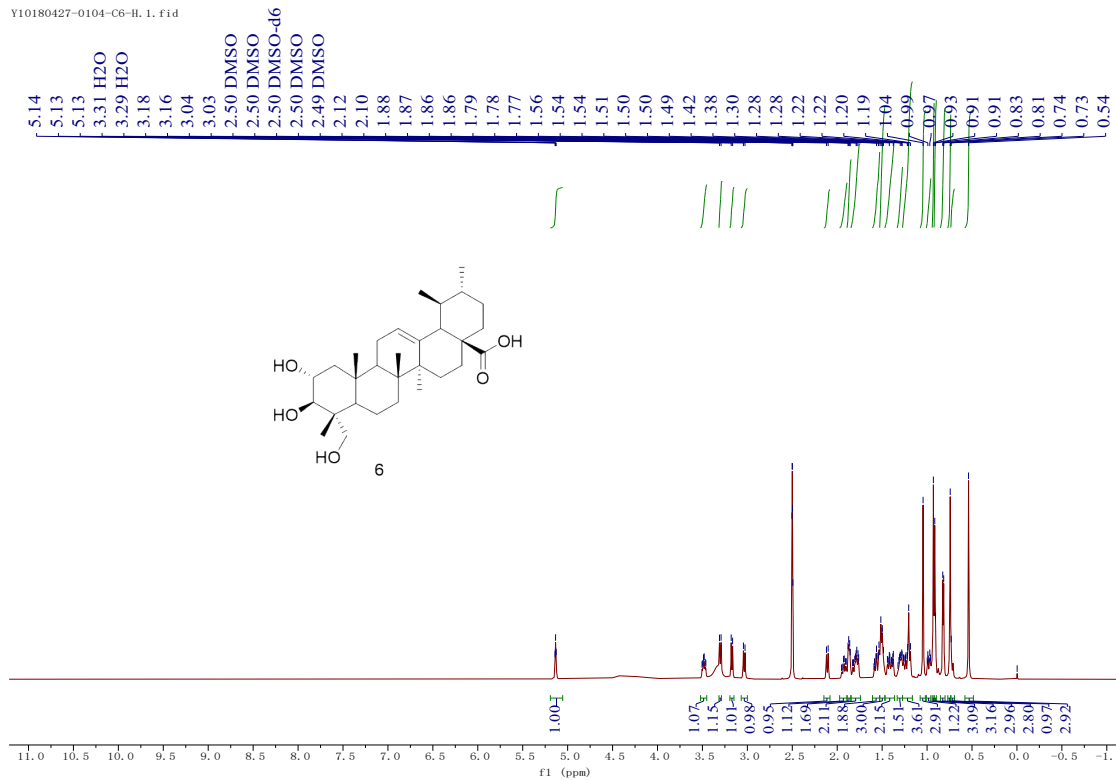

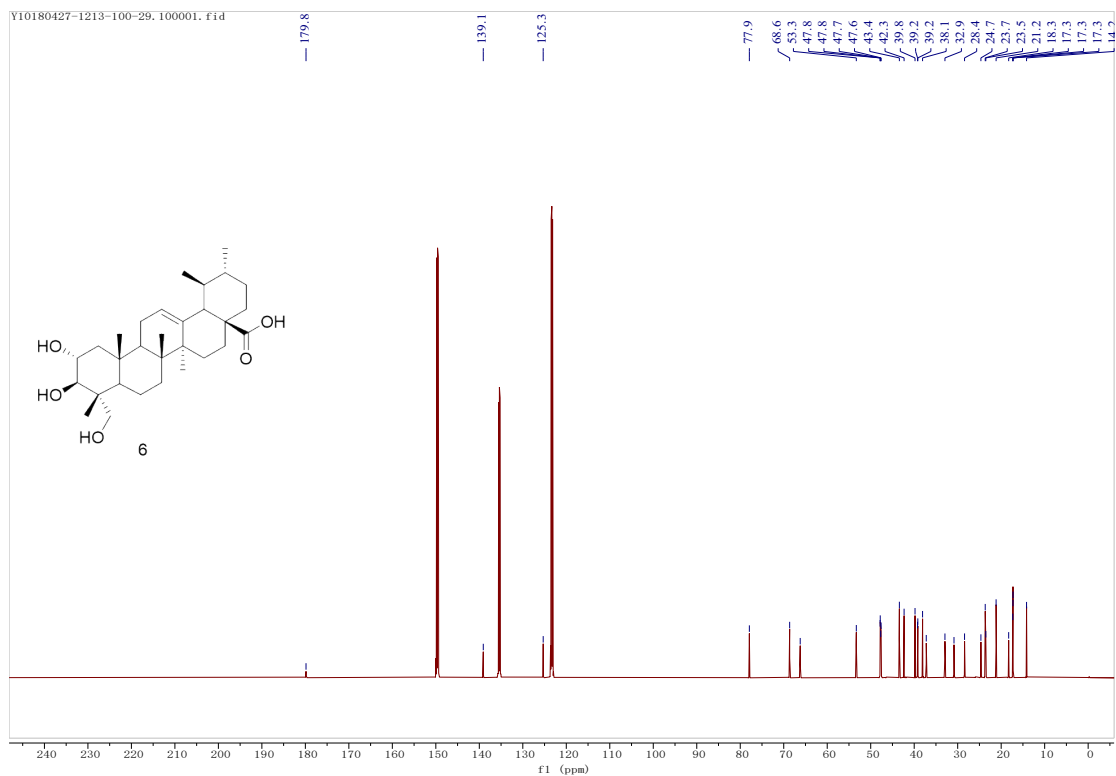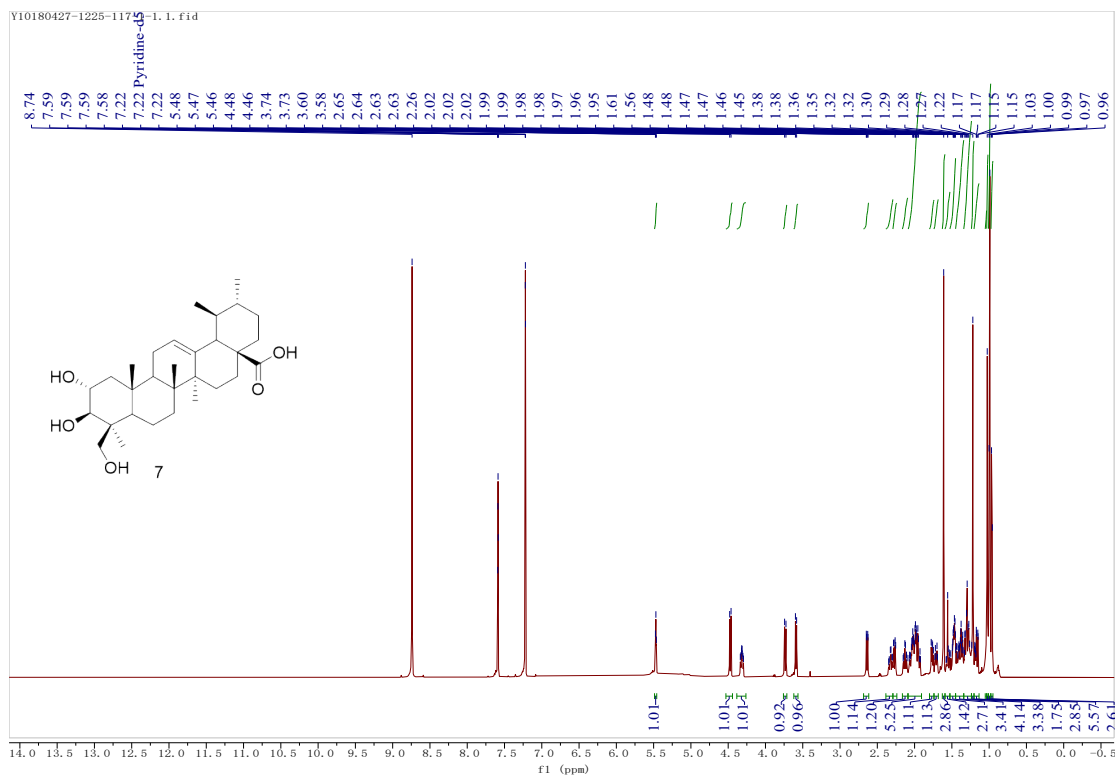

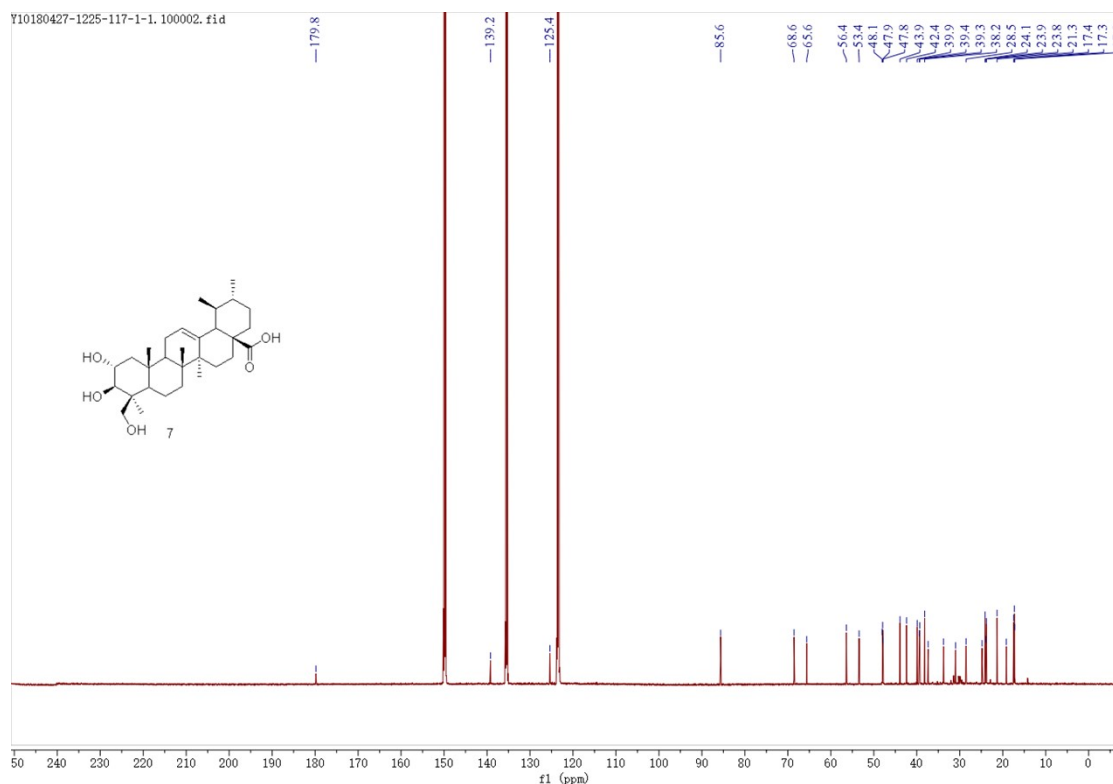

## References

1. A Inada, M. Y., H Murata, M Kobayashi, H Toya, Y Kato, T Nakanishi, Phytochemical studies of seeds of medicinal plants. I. Two sulfated triterpenoid glycosides, sulfapatrinosides I and II, from seeds of *Patrinia scabiosaefolia* FISCHER. *Chemical and Pharmaceutical Bulletin* **1988**, *36* (11), 4269-4274.
2. José A. Guerrero-Analco, L. M., Ammar Saleem, Padma Madiraju, Asim Muhammad, Tony Durst, Pierre Haddad, John Thor Arnason, Bioassay-Guided Isolation of the Antidiabetic Principle from *Sorbus decora* (Rosaceae) Used Traditionally by the Eeyou Istchee Cree First Nations. *J. Nat. Prod.* **2010**, *73* (9), 1519–1523.
3. Yutaka Sashida, K. O., Tsuyoshi Yamanouchi, Hiroyuki Tanaka, Yukihiro Shoyama, Itsuo Nishioka, Triterpenoids from callus tissue of *Actinidia polygama*. *Phytochemistry* **1994**, *35* (2), 377-380.
4. Viet Cuong, L. C.; Anh, L. T.; Huu Dat, T. T.; Anh, T. T. P.; Lien, L. Q.; Kim, Y. H.; Tuan Anh, H. L., Cytotoxic and anti-inflammatory activities of secondary metabolites from *Ophiorrhiza baviensis* growing in Thua Thien Hue, Vietnam. *Nat Prod Res* **2019**, *35* (22), 4218-4224.
5. Sashida, Y. O., Kazunori; Mori, Noriaki; Yamanouchi, Tsuyoshi., Triterpenoids from the fruit galls of *Actinidia polygama*. *Phytochemistry* **1992**, *31* (8), 2801-2804.
